# Supplementary material for: Solving the mystery of Obake rice in Africa: population structure analyses of Oryza longistaminata reveal three genetic groups and evidence of both recent and ancient introgression with O. sativa
Source: Front Plant Sci. 2023 Nov 15;14:1278196. doi: 10.3389/fpls.2023.1278196 (PMC10684938; doi:10.3389/fpls.2023.1278196)
Supplement: Supplementary file 1 [file Table_1.xlsx]

## Sheet: Metadata
Column name	Column Description
BioProject	The NCBI BioProject for the genotype data of the individual
SRA_Accession	The NCBI SRA Accession for the genotype data of the individual
source_institution	The institution which provided the seed or genotype data
genebank_id	The relevant genebank ID of the accession
study_sampleid	The sample ID of the individual used in this study
varietal_names	Any known varietal names which refer to the accession
other_names	Other names which refer to the accession
latitude	Georeference latitude for the accession
longitude	Georeference longitude for the accession
origin_country	Origin country of the accession
dapc_k6_all	DAPC groupings for all individuals in the study at K = 6
structure_k2_qoutgroups	The individual's STRUCTURE Q value for the control outgroup subpopulation, comprising O. sativa, O. glabberima, and O. barthii, for all individuals in the study at K = 2
structure_k2_qlongi	The individual's STRUCTURE Q value for the O. longistaminata subpopulation for all individuals in the study at K = 2
structure_popinfo	The individual's popinfo field for use in the STRUCTURE USEPOPINFO analysis
structure_popinfo_qsativa	The individual's STRUCTURE Q value for the O. sativa subpopulation in the STRUCTURE USEPOPINFO analysis
structure_popinfo_q_glabbarth	The individual's STRUCTURE Q value for the combined O. barthii and O. glabberima subpopulation in the STRUCTURE USEPOPINFO analysis
structure_popinfo_qlongi	The individual's STRUCTURE Q value for the O. longistaminata subpopulation in the STRUCTURE USEPOPINFO analysis
dapc_longi_admixcut045_k6	The DAPC groups for all O. longistaminata individuals less than 4.5% admixed with O. sativa at K = 6.
structure_k3_q_panafrica	The individual's STRUCTURE Q value for the pan-African O. longistaminata group for all O. longistaminata individuals less than 15% admixed with the control outgroups at K = 3
structure_k3_q_northwestern	The individual's STRUCTURE Q value for the northwestern African O. longistaminata group for all O. longistaminata individuals less than 15% admixed with the control outgroups at K = 3
structure_k3_q_southern	The individual's STRUCTURE Q value for the southern African O. longistaminata group for all O. longistaminata individuals less than 15% admixed with the control outgroups at K = 3
gid4	The individual's marker score for the gid4 plastid marker
olc3	The individual's marker score for the olc3 plastid marker
olc5	The individual's marker score for the olc5 plastid marker
olc7	The individual's marker score for the olc6 plastid marker
rct8	The individual's marker score for the rct8 plastid marker
rct9	The individual's marker score for the rct9 plastid marker
rid3	The individual's marker score for the rid3 plastid marker

## Sheet: Supplementary Table 1
BioProject	SRA_Accession	source_institution	genebank_id	study_sampleid	varietal_names	other_names	latitude	longitude	origin_country	dapc_k6_all	structure_k2_qoutgroups	structure_k2_qlongi	structure_popinfo	structure_popinfo_qsativa	structure_popinfo_q_glabbarth	structure_popinfo_qlongi	dapc_longi_admixcut045_k6	structure_k3_q_panafrica	structure_k3_q_northwestern	structure_k3_q_southern	gid4	olc3	olc5	olc7	rct8	rct9	rid3
PRJNA315063	SAMN04549198	United State Department of Agriculture	PI 450453	SRR3231751	NA	TOg7197	7.4	-7.55	Cote d'Ivoire	1	1	0	2	0	1	0	NA	NA	NA	NA	NA	NA	NA	NA	NA	NA	NA
PRJNA315063	SAMN04549196	United State Department of Agriculture	PI 450237	SRR3231749	NA	TOg6203	10.3833	-9.3	Guinea	1	1	0	2	0	1	0	NA	NA	NA	NA	NA	NA	NA	NA	NA	NA	NA
PRJNA315063	SAMN04549195	International Rice Research Institute	IRGC 75729	SRR3231748	Morible founzan		12.7453	-3.76306	Burkina Faso	1	0.999	0.001	0	0	1	0	NA	NA	NA	NA	NA	NA	NA	NA	NA	NA	NA
PRJNA315063	SAMN04549194	International Rice Research Institute	IRGC 75618	SRR3231747	Ipando		12.0164	-2.31639	Burkina Faso	1	0.998	0.002	0	0.003	0.994	0.003	NA	NA	NA	NA	NA	NA	NA	NA	NA	NA	NA
PRJNA315063	SAMN04549193	International Rice Research Institute	IRGC 75546	SRR3231746	Bouroum bouroum		13.6528	-0.550833	Burkina Faso	1	1	0	2	0	1	0	NA	NA	NA	NA	NA	NA	NA	NA	NA	NA	NA
PRJNA315063	SAMN04549191	International Rice Research Institute	IRGC 61457	SRR3231744	Konowobo		6.45222	-9.42833	Liberia	1	1	0	2	0	1	0	NA	NA	NA	NA	NA	NA	NA	NA	NA	NA	NA
PRJNA315063	SAMN04549190	International Rice Research Institute	IRGC 58622	SRR3231743	Pa salkuta		8.46444	-11.7958	Sierra Leone	1	1	0	2	0	1	0	NA	NA	NA	NA	NA	NA	NA	NA	NA	NA	NA
PRJNA315063	SAMN04549189	International Rice Research Institute	IRGC 105052	SRR3231742	Dissi pala		10.1833	-14.0664	Guinea	1	0.999	0.001	0	0.001	0.999	0.001	NA	NA	NA	NA	NA	NA	NA	NA	NA	NA	NA
PRJNA315063	SAMN04549187	International Rice Research Institute	IRGC 105049	SRR3231740	Gbeke 1 (late)		6.98333	-9.58333	Liberia	1	1	0	2	0	1	0	NA	NA	NA	NA	NA	NA	NA	NA	NA	NA	NA
PRJNA315063	SAMN04549186	International Rice Research Institute	IRGC 105048	SRR3231739	Shawhon		6.98333	-9.6	Liberia	1	1	0	2	0.002	0.997	0.001	NA	NA	NA	NA	NA	NA	NA	NA	NA	NA	NA
PRJNA315063	SAMN04549185	International Rice Research Institute	IRGC 105044	SRR3231738	Lunduko sondu		11.3167	-12.2831	Guinea	1	1	0	2	0	1	0	NA	NA	NA	NA	NA	NA	NA	NA	NA	NA	NA
PRJNA315063	SAMN04549184	International Rice Research Institute	IRGC 105043	SRR3231737	Millcciv blanc		11.2167	-11.8164	Guinea	1	1	0	2	0	1	0	NA	NA	NA	NA	NA	NA	NA	NA	NA	NA	NA
PRJNA315063	SAMN04549182	International Rice Research Institute	IRGC 105036	SRR3231735	Saali		10.6661	-14.5997	Guinea	1	1	0	2	0	1	0	NA	NA	NA	NA	NA	NA	NA	NA	NA	NA	NA
PRJNA315063	SAMN04549181	International Rice Research Institute	IRGC 105034	SRR3231734	Bindje fore		10.3497	-14.3664	Guinea	1	1	0	2	0	1	0	NA	NA	NA	NA	NA	NA	NA	NA	NA	NA	NA
PRJNA315063	SAMN04549180	International Rice Research Institute	IRGC 105026	SRR3231733	Salifore		9.43056	-13.0878	Guinea	1	1	0	2	0	1	0	NA	NA	NA	NA	NA	NA	NA	NA	NA	NA	NA
PRJNA315063	SAMN04549179	International Rice Research Institute	IRGC 105021	SRR3231732	Tongbon		10.8497	-10.9333	Guinea	1	1	0	2	0	1	0	NA	NA	NA	NA	NA	NA	NA	NA	NA	NA	NA
PRJNA315063	SAMN04549178	International Rice Research Institute	IRGC 105011	SRR3231731	Molole		11.4333	-9.03306	Guinea	1	1	0	2	0	1	0	NA	NA	NA	NA	NA	NA	NA	NA	NA	NA	NA
PRJNA315063	SAMN04549176	International Rice Research Institute	IRGC 104934	SRR3231729	Ex toussiana		10.8333	-4.58333	Burkina Faso	1	1	0	2	0	1	0	NA	NA	NA	NA	NA	NA	NA	NA	NA	NA	NA
PRJNA315063	SAMN04549172	International Rice Research Institute	IRGC 104571	SRR3231725	CG 86 (3)		14.4994	-14.4456	Senegal	1	1	0	2	0	1	0	NA	NA	NA	NA	NA	NA	NA	NA	NA	NA	NA
PRJNA315063	SAMN04549171	International Rice Research Institute	IRGC 104566	SRR3231724	CG 9 (2)		12.7167	-15.6	Senegal	1	1	0	2	0	1	0	NA	NA	NA	NA	NA	NA	NA	NA	NA	NA	NA
PRJNA315063	SAMN04549169	International Rice Research Institute	IRGC 104561	SRR3231722	Mala		8.26667	-10.4833	Sierra Leone	1	1	0	2	0	1	0	NA	NA	NA	NA	NA	NA	NA	NA	NA	NA	NA
PRJNA315063	SAMN04549168	International Rice Research Institute	IRGC 104545	SRR3231721	Ex wurno		15.8333	5.83333	Nigeria	1	1	0	2	0	1	0	NA	NA	NA	NA	NA	NA	NA	NA	NA	NA	NA
PRJNA315063	SAMN04549167	International Rice Research Institute	IRGC 104533	SRR3231720	Kyanga		12.8333	4.7	Nigeria	1	1	0	2	0	1	0	NA	NA	NA	NA	NA	NA	NA	NA	NA	NA	NA
PRJNA315063	SAMN04549166	International Rice Research Institute	IRGC 104294	SRR3231719	Tog 12446		9.66667	15	Chad	1	1	0	2	0	1	0	NA	NA	NA	NA	NA	NA	NA	NA	NA	NA	NA
PRJNA315063	SAMN04549165	International Rice Research Institute	IRGC 104260	SRR3231718	Sinyarue		7.23333	0.56667	Ghana	1	1	0	2	0	1	0	NA	NA	NA	NA	NA	NA	NA	NA	NA	NA	NA
PRJNA315063	SAMN04549164	International Rice Research Institute	IRGC 104231	SRR3231717	Gbetui 2		7.83333	-10.7667	Sierra Leone	1	1	0	2	0	1	0	NA	NA	NA	NA	NA	NA	NA	NA	NA	NA	NA
PRJNA315063	SAMN04549163	International Rice Research Institute	IRGC 104195	SRR3231716	Ex Santrokof kpandu		6.15	0.26667	Ghana	1	1	0	2	0	1	0	NA	NA	NA	NA	NA	NA	NA	NA	NA	NA	NA
PRJNA315063	SAMN04549162	International Rice Research Institute	IRGC 104194	SRR3231715	Saali		9.27306	-13.0242	Guinea	1	1	0	2	0	1	0	NA	NA	NA	NA	NA	NA	NA	NA	NA	NA	NA
PRJNA315063	SAMN04549161	International Rice Research Institute	IRGC 104190	SRR3231714	Melange		10.5842	-12.5608	Guinea	1	1	0	2	0.013	0.987	0	NA	NA	NA	NA	NA	NA	NA	NA	NA	NA	NA
PRJNA315063	SAMN04549160	International Rice Research Institute	IRGC 104187	SRR3231713	Samande		10.9164	-12.1833	Guinea	1	1	0	2	0	1	0	NA	NA	NA	NA	NA	NA	NA	NA	NA	NA	NA
PRJNA315063	SAMN04549159	International Rice Research Institute	IRGC 104182	SRR3231712	Saali bandje		10.8167	-12.6997	Guinea	1	1	0	2	0	1	0	NA	NA	NA	NA	NA	NA	NA	NA	NA	NA	NA
PRJNA315063	SAMN04549158	International Rice Research Institute	IRGC 104181	SRR3231711	Koutoun kasa		10.8986	-12.5586	Guinea	1	1	0	2	0	1	0	NA	NA	NA	NA	NA	NA	NA	NA	NA	NA	NA
PRJNA315063	SAMN04549157	International Rice Research Institute	IRGC 104180	SRR3231710	Koutou baly		11.1831	-12.2042	Guinea	1	1	0	2	0	1	0	NA	NA	NA	NA	NA	NA	NA	NA	NA	NA	NA
PRJNA315063	SAMN04549156	International Rice Research Institute	IRGC 104178	SRR3231709	Milauge		12.3547	-13.14	Guinea	1	1	0	2	0	1	0	NA	NA	NA	NA	NA	NA	NA	NA	NA	NA	NA
PRJNA315063	SAMN04549155	International Rice Research Institute	IRGC 104177	SRR3231708	Samande		11.0714	-14.4219	Guinea	1	1	0	2	0	1	0	NA	NA	NA	NA	NA	NA	NA	NA	NA	NA	NA
PRJNA315063	SAMN04549154	International Rice Research Institute	IRGC 104173	SRR3231707	Danki		10.0164	-10.8333	Guinea	1	1	0	2	0	1	0	NA	NA	NA	NA	NA	NA	NA	NA	NA	NA	NA
PRJNA315063	SAMN04549151	International Rice Research Institute	IRGC 104044	SRR3231704	TG 34		9.41667	16.3333	Chad	1	1	0	2	0	1	0	NA	NA	NA	NA	NA	NA	NA	NA	NA	NA	NA
PRJNA315063	SAMN04549150	International Rice Research Institute	IRGC 104036	SRR3231703	Cuisson 2		6.58972	-8.24583	Cote d'Ivoire	1	1	0	2	0	1	0	NA	NA	NA	NA	NA	NA	NA	NA	NA	NA	NA
PRJNA315063	SAMN04549149	International Rice Research Institute	IRGC 104035	SRR3231702	M'mleu waha		6.68556	-8.31139	Cote d'Ivoire	1	1	0	2	0	1	0	NA	NA	NA	NA	NA	NA	NA	NA	NA	NA	NA
PRJNA315063	SAMN04549147	International Rice Research Institute	IRGC 104032	SRR3231700	N'Konto		11.3558	-15.1167	Guinea-Bissau	1	1	0	2	0.005	0.993	0.002	NA	NA	NA	NA	NA	NA	NA	NA	NA	NA	NA
PRJNA315063	SAMN04549146	International Rice Research Institute	IRGC 104030	SRR3231699	Kerkimbel		11.6833	-14.7658	Guinea-Bissau	1	0.999667	0.000333333	0	0	1	0	NA	NA	NA	NA	NA	NA	NA	NA	NA	NA	NA
PRJNA315063	SAMN04549144	International Rice Research Institute	IRGC 104028	SRR3231697	Baladian		12.3486	-14.3528	Guinea-Bissau	1	1	0	2	0	1	0	NA	NA	NA	NA	NA	NA	NA	NA	NA	NA	NA
PRJNA315063	SAMN04549142	International Rice Research Institute	IRGC 104024	SRR3231695	N'konto		11.8692	-15.6086	Guinea-Bissau	1	1	0	2	0	1	0	NA	NA	NA	NA	NA	NA	NA	NA	NA	NA	NA
PRJNA315063	SAMN04549141	International Rice Research Institute	IRGC 104023	SRR3231694	BG 76		11.8833	-15.8497	Guinea-Bissau	1	1	0	2	0	1	0	NA	NA	NA	NA	NA	NA	NA	NA	NA	NA	NA
PRJNA315063	SAMN04549140	International Rice Research Institute	IRGC 104022	SRR3231693	BG 71		11.785	-15.9175	Guinea-Bissau	1	1	0	2	0.002	0.996	0.002	NA	NA	NA	NA	NA	NA	NA	NA	NA	NA	NA
PRJNA315063	SAMN04549139	International Rice Research Institute	IRGC 104011	SRR3231692	Ex jalingo		8.88333	11.3833	Nigeria	1	1	0	2	0	1	0	NA	NA	NA	NA	NA	NA	NA	NA	NA	NA	NA
PRJNA315063	SAMN04549138	International Rice Research Institute	IRGC 103995	SRR3231691	Gbalan katan		9.11667	-11.9167	Sierra Leone	1	1	0	2	0	1	0	NA	NA	NA	NA	NA	NA	NA	NA	NA	NA	NA
PRJNA315063	SAMN04549137	International Rice Research Institute	IRGC 103994	SRR3231690	Gbessama 2		9.05	-11.7333	Sierra Leone	1	1	0	2	0	1	0	NA	NA	NA	NA	NA	NA	NA	NA	NA	NA	NA
PRJNA315063	SAMN04549135	International Rice Research Institute	IRGC 103992	SRR3231688	Genekoi		7.28333	-11.3333	Sierra Leone	1	1	0	2	0	1	0	NA	NA	NA	NA	NA	NA	NA	NA	NA	NA	NA
PRJNA315063	SAMN04549134	International Rice Research Institute	IRGC 103991	SRR3231687	Ex pende kailahun		8.13333	-10.8833	Sierra Leone	1	1	0	2	0.002	0.997	0.001	NA	NA	NA	NA	NA	NA	NA	NA	NA	NA	NA
PRJNA315063	SAMN04549133	International Rice Research Institute	IRGC 103989	SRR3231686	Pedikum		8.23333	-10.3667	Sierra Leone	1	1	0	2	0	1	0	NA	NA	NA	NA	NA	NA	NA	NA	NA	NA	NA
PRJNA315063	SAMN04549132	International Rice Research Institute	IRGC 103988	SRR3231685	Gindah		8.28333	-10.5833	Sierra Leone	1	1	0	2	0	1	0	NA	NA	NA	NA	NA	NA	NA	NA	NA	NA	NA
PRJNA315063	SAMN04549131	International Rice Research Institute	IRGC 103982	SRR3231684	Ex danbatta		12.75	8.83333	Nigeria	1	1	0	2	0	1	0	NA	NA	NA	NA	NA	NA	NA	NA	NA	NA	NA
PRJNA315063	SAMN04549130	International Rice Research Institute	IRGC 103981	SRR3231683	NG77E-17		8.91667	4.63333	Nigeria	1	1	0	2	0	1	0	NA	NA	NA	NA	NA	NA	NA	NA	NA	NA	NA
PRJNA315063	SAMN04549129	International Rice Research Institute	IRGC 103967	SRR3231682	Samodje 2		12.5008	-15.5217	Senegal	1	1	0	2	0	1	0	NA	NA	NA	NA	NA	NA	NA	NA	NA	NA	NA
PRJNA315063	SAMN04549128	International Rice Research Institute	IRGC 103963	SRR3231681	Malou nfouma (G)		12.5294	-15.7081	Senegal	1	1	0	2	0	1	0	NA	NA	NA	NA	NA	NA	NA	NA	NA	NA	NA
PRJNA315063	SAMN04549127	International Rice Research Institute	IRGC 103960	SRR3231680	Mano muosso		12.5703	-15.9042	Senegal	1	1	0	2	0	1	0	NA	NA	NA	NA	NA	NA	NA	NA	NA	NA	NA
PRJNA315063	SAMN04549126	International Rice Research Institute	IRGC 103959	SRR3231679	Baladiango		12.5556	-15.8275	Senegal	1	1	0	2	0	1	0	NA	NA	NA	NA	NA	NA	NA	NA	NA	NA	NA
PRJNA315063	SAMN04549125	International Rice Research Institute	IRGC 103958	SRR3231678	Combo tuonkoun		12.6364	-15.4725	Senegal	1	1	0	2	0.001	0.998	0.001	NA	NA	NA	NA	NA	NA	NA	NA	NA	NA	NA
PRJNA315063	SAMN04549124	International Rice Research Institute	IRGC 103957	SRR3231677	Mane mousso ou assaniouniaye		12.6008	-16.0694	Senegal	1	1	0	2	0	1	0	NA	NA	NA	NA	NA	NA	NA	NA	NA	NA	NA
PRJNA315063	SAMN04549123	International Rice Research Institute	IRGC 103956	SRR3231676	Lola coyo (G)		12.5858	-15.5433	Senegal	1	1	0	2	0	1	0	NA	NA	NA	NA	NA	NA	NA	NA	NA	NA	NA
PRJNA315063	SAMN04549122	International Rice Research Institute	IRGC 103955	SRR3231675	Essaniouniaye		12.6297	-16.0167	Senegal	1	1	0	2	0	1	0	NA	NA	NA	NA	NA	NA	NA	NA	NA	NA	NA
PRJNA315063	SAMN04549121	International Rice Research Institute	IRGC 103953	SRR3231674	Makassa		9	-13	Sierra Leone	1	1	0	2	0	1	0	NA	NA	NA	NA	NA	NA	NA	NA	NA	NA	NA
PRJNA315063	SAMN04549120	International Rice Research Institute	IRGC 103949	SRR3231673	Gbagai (Kelei)		8.28333	-10.1	Liberia	1	1	0	2	0	1	0	NA	NA	NA	NA	NA	NA	NA	NA	NA	NA	NA
PRJNA315063	SAMN04549119	International Rice Research Institute	IRGC 103948	SRR3231672	Sokpong (large panicle)		8.18333	-10.2333	Liberia	1	1	0	2	0	1	0	NA	NA	NA	NA	NA	NA	NA	NA	NA	NA	NA
PRJNA315063	SAMN04549118	International Rice Research Institute	IRGC 103946	SRR3231671	Sokpong		8.4	-10.1833	Liberia	1	1	0	2	0	1	0	NA	NA	NA	NA	NA	NA	NA	NA	NA	NA	NA
PRJNA315063	SAMN04549117	International Rice Research Institute	IRGC 103937	SRR3231670	Bah		6.18333	-9.76667	Liberia	1	1	0	2	0	1	0	NA	NA	NA	NA	NA	NA	NA	NA	NA	NA	NA
PRJNA315063	SAMN04549116	International Rice Research Institute	IRGC 103922	SRR3231669	Adankaru		11.1667	4.66667	Nigeria	1	1	0	2	0	1	0	NA	NA	NA	NA	NA	NA	NA	NA	NA	NA	NA
PRJNA315063	SAMN04549115	International Rice Research Institute	IRGC 103599	SRR3231668	Tog 7275		8.7	14.1833	Cameroon	1	1	0	2	0	1	0	NA	NA	NA	NA	NA	NA	NA	NA	NA	NA	NA
PRJNA315063	SAMN04549114	International Rice Research Institute	IRGC 103592	SRR3231667	Marori		10.1667	14.3333	Cameroon	1	1	0	2	0	1	0	NA	NA	NA	NA	NA	NA	NA	NA	NA	NA	NA
PRJNA315063	SAMN04549113	International Rice Research Institute	IRGC 103530	SRR3231666	Tog 7183		14.2333	-3.61667	Mali	1	0.999	0.001	0	0.009	0.99	0.001	NA	NA	NA	NA	NA	NA	NA	NA	NA	NA	NA
PRJNA315063	SAMN04549112	International Rice Research Institute	IRGC 103517	SRR3231665	Tog 7325		14.3333	-4.9	Mali	1	0.999	0.001	0	0.004	0.99	0.006	NA	NA	NA	NA	NA	NA	NA	NA	NA	NA	NA
PRJNA315063	SAMN04549111	International Rice Research Institute	IRGC 103463	SRR3231664	Tog 7176		12.5167	-16.5833	Senegal	1	1	0	2	0	1	0	NA	NA	NA	NA	NA	NA	NA	NA	NA	NA	NA
PRJNA315063	SAMN04549110	International Rice Research Institute	IRGC 103461	SRR3231663	Tog 7172		13.5333	-16.4167	Senegal	1	1	0	2	0	1	0	NA	NA	NA	NA	NA	NA	NA	NA	NA	NA	NA
PRJNA315063	SAMN04549109	International Rice Research Institute	IRGC 103456	SRR3231662	Tog 7357		13.0167	-15.7167	Senegal	1	1	0	2	0	1	0	NA	NA	NA	NA	NA	NA	NA	NA	NA	NA	NA
PRJNA315063	SAMN04549108	International Rice Research Institute	IRGC 103452	SRR3231661	Tog 7153		13.7664	-16.4833	Senegal	1	1	0	2	0	1	0	NA	NA	NA	NA	NA	NA	NA	NA	NA	NA	NA
PRJNA315063	SAMN04549107	International Rice Research Institute	IRGC 103450	SRR3231660	Tog 7149		13.25	-15.8333	Gambia	1	1	0	2	0	1	0	NA	NA	NA	NA	NA	NA	NA	NA	NA	NA	NA
PRJNA315063	SAMN04549106	International Rice Research Institute	IRGC 103442	SRR3231659	Tog 7299		12.65	-15.4667	Senegal	1	1	0	2	0	1	0	NA	NA	NA	NA	NA	NA	NA	NA	NA	NA	NA
PRJNA550398	SAMN12127192	United States Department of Agriculture	PI 419449	Silewah	Silewah		-1	100.5	Indonesia	3	0.994	0.006	0	0.967	0.01	0.0233333	NA	NA	NA	NA	212	320	306	374	150	NA	NA
PRJNA550398	SAMN12127177	Fengyi Hu, Yunnan University	NA	RILs78	NA					2	0.899	0.101	0	0.887	0.001	0.112	NA	NA	NA	NA	NA	NA	NA	NA	NA	NA	NA
PRJNA550398	SAMN12127158	Fengyi Hu, Yunnan University	NA	RILs60	NA					2	0.894667	0.105333	0	0.881	0.001	0.118	NA	NA	NA	NA	NA	NA	NA	NA	NA	NA	NA
PRJNA550398	SAMN12127156	Fengyi Hu, Yunnan University	NA	RILs59	NA					2	0.956	0.044	0	0.948667	0.001	0.051	NA	NA	NA	NA	NA	NA	NA	NA	NA	NA	NA
PRJNA550398	SAMN12127145	Fengyi Hu, Yunnan University	NA	RILs48	NA					2	0.91	0.09	0	0.898333	0.001	0.101	NA	NA	NA	NA	NA	NA	NA	NA	NA	NA	NA
PRJNA550398	SAMN12127144	Fengyi Hu, Yunnan University	NA	RILs47	NA					2	0.848	0.152	0	0.839	0.001	0.16	NA	NA	NA	NA	NA	NA	NA	NA	NA	NA	NA
PRJNA550398	SAMN12127140	Fengyi Hu, Yunnan University	NA	RILs43	NA					2	0.898	0.102	0	0.884	0.001	0.115	NA	NA	NA	NA	NA	NA	NA	NA	NA	NA	NA
PRJNA550398	SAMN12127139	Fengyi Hu, Yunnan University	NA	RILs42	NA					2	0.908	0.092	0	0.901	0.001	0.0983333	NA	NA	NA	NA	NA	NA	NA	NA	NA	NA	NA
PRJNA550398	SAMN12127106	Fengyi Hu, Yunnan University	NA	RILs31	NA					3	0.877	0.123	0	0.861	0.001	0.138	NA	NA	NA	NA	NA	NA	NA	NA	NA	NA	NA
PRJNA550398	SAMN12127094	Fengyi Hu, Yunnan University	NA	RILs3	NA					2	0.893	0.107	0	0.884	0.001	0.115	NA	NA	NA	NA	NA	NA	NA	NA	NA	NA	NA
PRJNA550398	SAMN12127063	Fengyi Hu, Yunnan University	NA	RILs27	NA					2	0.899	0.101	0	0.887	0.001	0.112	NA	NA	NA	NA	NA	NA	NA	NA	NA	NA	NA
PRJNA550398	SAMN12127031	Fengyi Hu, Yunnan University	NA	RILs24	NA					2	0.878	0.122	0	0.864	0.001	0.135	NA	NA	NA	NA	NA	NA	NA	NA	NA	NA	NA
PRJNA550398	SAMN12127020	Fengyi Hu, Yunnan University	NA	RILs23	NA					2	0.893	0.107	0	0.885	0.001	0.114	NA	NA	NA	NA	NA	NA	NA	NA	NA	NA	NA
PRJNA550398	SAMN12126934	Fengyi Hu, Yunnan University	NA	RILs15	NA					2	0.826	0.174	0	0.815	0.001	0.184	NA	NA	NA	NA	NA	NA	NA	NA	NA	NA	NA
PRJNA550398	SAMN12126890	Fengyi Hu, Yunnan University	NA	RILs11	NA					2	0.898	0.102	0	0.888	0.001	0.112	NA	NA	NA	NA	NA	NA	NA	NA	NA	NA	NA
PRJNA550398	SAMN12126868	Seed World	NA	Rex	Rex		NA	NA	United States of America	3	0.992667	0.00733333	0	0.987	0.001	0.012	NA	NA	NA	NA	212	320	306	374	149	163	232
PRJNA550398	SAMN12126867	United States Department of Agriculture	PI 269940	Miragram	Miragram		36.2667	72.3667	Pakistan	3	0.997	0.003	0	0.966	0.02	0.013	NA	NA	NA	NA	212	NA	306	374	150	163	NA
PRJNA550398	SAMN12126866	United States Department of Agriculture	GSOR 300034	Kitaake	Kitaake		NA	NA	Japan	3	0.996	0.004	0	0.973	0.0163333	0.011	NA	NA	NA	NA	212	320	306	374	150	163	232
PRJEB6180	ERS468138	International Rice Research Institute	IRGC 56823	IRIS 313-9989	MELEKE		NA	NA	Ivory Coast	2	1	0	3	1	0	0	NA	NA	NA	NA	NA	NA	NA	NA	NA	NA	NA
PRJEB6180	ERS468137	International Rice Research Institute	IRGC 56751	IRIS 313-9986	SOM DIGUIME		NA	NA	Guinea-Bissau	2	1	0	3	1	0	0	NA	NA	NA	NA	NA	NA	NA	NA	NA	NA	NA
PRJEB6180	ERS468314	International Rice Research Institute	IRGC 55785	IRIS 313-9978	IRAT 118		NA	NA	Madagascar	3	0.996	0.004	0	0.97	0.009	0.022	NA	NA	NA	NA	NA	NA	NA	NA	NA	NA	NA
PRJEB6180	ERS467796	International Rice Research Institute	IRGC 55346	IRIS 313-9969	PUTTU NELLU		NA	NA	Sri Lanka	2	1	0	3	1	0	0	NA	NA	NA	NA	NA	NA	NA	NA	NA	NA	NA
PRJEB6180	ERS468348	International Rice Research Institute	IRGC 51605	IRIS 313-9963	WIR1391		NA	NA	Sri Lanka	2	1	0	3	0.986	0.006	0.008	NA	NA	NA	NA	NA	NA	NA	NA	NA	NA	NA
PRJEB6180	ERS468297	International Rice Research Institute	IRGC 50950	IRIS 313-9944	SOLOMON RED RICE		NA	NA	Solomon Islands	2	1	0	3	1	0	0	NA	NA	NA	NA	NA	NA	NA	NA	NA	NA	NA
PRJEB6180	ERS468130	International Rice Research Institute	IRGC 50155	IRIS 313-9936	SITHAIYAN KOTTAI SAMBA		NA	NA	Sri Lanka	2	1	0	3	1	0	0	NA	NA	NA	NA	NA	NA	NA	NA	NA	NA	NA
PRJEB6180	ERS468125	International Rice Research Institute	IRGC 36420	IRIS 313-9917	CHANDINA		NA	NA	Sri Lanka	2	1	0	3	1	0	0	NA	NA	NA	NA	NA	NA	NA	NA	NA	NA	NA
PRJEB6180	ERS468339	International Rice Research Institute	IRGC 12872	IRIS 313-9838	TEPUKE		NA	NA	New Zealand	3	1	0	3	1	0	0	NA	NA	NA	NA	NA	NA	NA	NA	NA	NA	NA
PRJEB6180	ERS467828	International Rice Research Institute	IRGC 8993	IRIS 313-9809	NALUMOOLAI KARUPAN		NA	NA	Sri Lanka	2	1	0	3	1	0	0	NA	NA	NA	NA	NA	NA	NA	NA	NA	NA	NA
PRJEB6180	ERS468116	International Rice Research Institute	IRGC 5805	IRIS 313-9791	LEAD		NA	NA	Malawi	2	1	0	3	1	0	0	NA	NA	NA	NA	NA	NA	NA	NA	NA	NA	NA
PRJEB6180	ERS468406	International Rice Research Institute	IRGC 69911	IRIS 313-9745	VARY MALADY		NA	NA	Madagascar	3	1	0	3	1	0	0	NA	NA	NA	NA	NA	NA	NA	NA	NA	NA	NA
PRJEB6180	ERS468458	International Rice Research Institute	IRGC 69857	IRIS 313-9742	LOHAMBITRO		NA	NA	Madagascar	3	1	0	3	1	0	0	NA	NA	NA	NA	NA	NA	NA	NA	NA	NA	NA
PRJEB6180	ERS468228	International Rice Research Institute	IRGC 69402	IRIS 313-9740	ROJOFOTSY		NA	NA	Madagascar	2	1	0	3	1	0	0	NA	NA	NA	NA	NA	NA	NA	NA	NA	NA	NA
PRJEB6180	ERS468112	International Rice Research Institute	IRGC 68672	IRIS 313-9732	MAMORIAKA		NA	NA	Madagascar	2	1	0	3	1	0	0	NA	NA	NA	NA	NA	NA	NA	NA	NA	NA	NA
PRJEB6180	ERS468108	International Rice Research Institute	IRGC 376	IRIS 313-9709	MAKALIOKA		NA	NA	Madagascar	2	1	0	3	1	0	0	NA	NA	NA	NA	NA	NA	NA	NA	NA	NA	NA
PRJEB6180	ERS468294	International Rice Research Institute	IRGC 1	IRIS 313-9699	Seraup 27		NA	NA	Malaysia	2	1	0	3	1	0	0	NA	NA	NA	NA	NA	NA	NA	NA	NA	NA	NA
PRJEB6180	ERS468293	International Rice Research Institute	IRGC 71644	IRIS 313-9694	UNGGUL		NA	NA	Malaysia	2	1	0	3	1	0	0	NA	NA	NA	NA	NA	NA	NA	NA	NA	NA	NA
PRJEB6180	ERS468227	International Rice Research Institute	IRGC 58541	IRIS 313-9687	PA KABAKIE		NA	NA	Sierra Leone	2	1	0	3	1	0	0	NA	NA	NA	NA	NA	NA	NA	NA	NA	NA	NA
PRJEB6180	ERS468090	International Rice Research Institute	IRGC 14615	IRIS 313-9590	KETAN SERANG		NA	NA	Indonesia	2	1	0	3	1	0	0	NA	NA	NA	NA	NA	NA	NA	NA	NA	NA	NA
PRJEB6180	ERS468226	International Rice Research Institute	IRGC 13334	IRIS 313-9582	SADOK		NA	NA	Malaysia	2	1	0	3	1	0	0	NA	NA	NA	NA	NA	NA	NA	NA	NA	NA	NA
PRJEB6180	ERS468451	International Rice Research Institute	IRGC 60392	IRIS 313-9568	PAMPANGON(H)		NA	NA	Malaysia	3	1	0	3	1	0	0	NA	NA	NA	NA	NA	NA	NA	NA	NA	NA	NA
PRJEB6180	ERS468082	International Rice Research Institute	IRGC 10976	IRIS 313-9551	BENGALY MORIMO		NA	NA	Madagascar	2	1	0	3	1	0	0	NA	NA	NA	NA	NA	NA	NA	NA	NA	NA	NA
PRJEB6180	ERS468080	International Rice Research Institute	IRGC 44	IRIS 313-9533	DUD KUNING		NA	NA	Indonesia	2	1	0	3	1	0	0	NA	NA	NA	NA	NA	NA	NA	NA	NA	NA	NA
PRJEB6180	ERS468073	International Rice Research Institute	IRGC 157	IRIS 313-9472	H 6		NA	NA	Sri Lanka	2	1	0	3	1	0	0	NA	NA	NA	NA	NA	NA	NA	NA	NA	NA	NA
PRJEB6180	ERS468071	International Rice Research Institute	IRGC 15924	IRIS 313-9461	KARANTABA 1		NA	NA	Senegal	2	1	0	3	1	0	0	NA	NA	NA	NA	NA	NA	NA	NA	NA	NA	NA
PRJEB6180	ERS468225	International Rice Research Institute	IRGC 71524	IRIS 313-9409	GUMPANGAR		NA	NA	Malaysia	2	1	0	3	1	0	0	NA	NA	NA	NA	NA	NA	NA	NA	NA	NA	NA
PRJEB6180	ERS468288	International Rice Research Institute	IRGC 58524	IRIS 313-9402	PA FADAYA		NA	NA	Sierra Leone	2	1	0	3	0.999	0	0	NA	NA	NA	NA	NA	NA	NA	NA	NA	NA	NA
PRJEB6180	ERS467841	International Rice Research Institute	IRGC 51555	IRIS 313-9388	VARY MALADY MENA		NA	NA	Madagascar	2	1	0	3	1	0	0	NA	NA	NA	NA	NA	NA	NA	NA	NA	NA	NA
PRJEB6180	ERS468396	International Rice Research Institute	IRGC 71596	IRIS 313-9375	PULUTAN		NA	NA	Malaysia	3	1	0	3	1	0	0	NA	NA	NA	NA	NA	NA	NA	NA	NA	NA	NA
PRJEB6180	ERS468057	International Rice Research Institute	IRGC 20154	IRIS 313-9320	SIPULUT HITAM PENDEK		NA	NA	Indonesia	2	1	0	3	1	0	0	NA	NA	NA	NA	NA	NA	NA	NA	NA	NA	NA
PRJEB6180	ERS467877	International Rice Research Institute	IRGC 27138	IRIS 313-9314	KAAKARAN		NA	NA	Indonesia	2	1	0	3	1	0	0	NA	NA	NA	NA	NA	NA	NA	NA	NA	NA	NA
PRJEB6180	ERS468284	International Rice Research Institute	IRGC 66614	IRIS 313-9310	PUTEH KACA		NA	NA	Indonesia	2	1	0	3	1	0	0	NA	NA	NA	NA	NA	NA	NA	NA	NA	NA	NA
PRJEB6180	ERS468283	International Rice Research Institute	IRGC 69456	IRIS 313-9294	AUS 78-62		NA	NA	Gambia	2	1	0	3	1	0	0	NA	NA	NA	NA	NA	NA	NA	NA	NA	NA	NA
PRJEB6180	ERS468223	International Rice Research Institute	IRGC 57578	IRIS 313-9273	RADEN SAWO 1		NA	NA	Indonesia	2	1	0	3	1	0	0	NA	NA	NA	NA	NA	NA	NA	NA	NA	NA	NA
PRJEB6180	ERS468043	International Rice Research Institute	IRGC 48552	IRIS 313-9251	JANDA LAOR		NA	NA	Indonesia	2	1	0	3	1	0	0	NA	NA	NA	NA	NA	NA	NA	NA	NA	NA	NA
PRJEB6180	ERS468040	International Rice Research Institute	IRGC 14285	IRIS 313-9210	KUATEK		NA	NA	Malaysia	2	1	0	3	1	0	0	NA	NA	NA	NA	NA	NA	NA	NA	NA	NA	NA
PRJEB6180	ERS468038	International Rice Research Institute	IRGC 35310	IRIS 313-9208	KACIK TARAM		NA	NA	Indonesia	2	1	0	3	1	0	0	NA	NA	NA	NA	NA	NA	NA	NA	NA	NA	NA
PRJEB6180	ERS468281	International Rice Research Institute	IRGC 66681	IRIS 313-9188	TUMBA		NA	NA	Indonesia	2	1	0	3	1	0	0	NA	NA	NA	NA	NA	NA	NA	NA	NA	NA	NA
PRJEB6180	ERS467852	International Rice Research Institute	IRGC 71646	IRIS 313-9187	WANGKOD		NA	NA	Malaysia	2	1	0	3	1	0	0	NA	NA	NA	NA	NA	NA	NA	NA	NA	NA	NA
PRJEB6180	ERS468220	International Rice Research Institute	IRGC 16009	IRIS 313-9160	THIERNO BANDE		NA	NA	Senegal	2	1	0	3	1	0	0	NA	NA	NA	NA	NA	NA	NA	NA	NA	NA	NA
PRJEB6180	ERS468279	International Rice Research Institute	IRGC 17186	IRIS 313-9117	BAJAR KUNING PAHIT		NA	NA	Indonesia	2	1	0	3	1	0	0	NA	NA	NA	NA	NA	NA	NA	NA	NA	NA	NA
PRJEB6180	ERS468278	International Rice Research Institute	IRGC 71570	IRIS 313-9102	MANUS		NA	NA	Malaysia	2	1	0	3	1	0	0	NA	NA	NA	NA	NA	NA	NA	NA	NA	NA	NA
PRJEB6180	ERS467808	International Rice Research Institute	IRGC 71514	IRIS 313-9101	DARAWAL		NA	NA	Malaysia	3	1	0	3	1	0	0	NA	NA	NA	NA	NA	NA	NA	NA	NA	NA	NA
PRJEB6180	ERS468277	International Rice Research Institute	IRGC 66659	IRIS 313-9098	SI MERIA		NA	NA	Indonesia	2	1	0	3	1	0	0	NA	NA	NA	NA	NA	NA	NA	NA	NA	NA	NA
PRJEB6180	ERS468276	International Rice Research Institute	IRGC 66538	IRIS 313-9097	CANTIK PAUN		NA	NA	Indonesia	2	1	0	3	1	0	0	NA	NA	NA	NA	NA	NA	NA	NA	NA	NA	NA
PRJEB6180	ERS468019	International Rice Research Institute	IRGC 14281	IRIS 313-9070	KONTOL 86		NA	NA	Malaysia	2	1	0	3	1	0	0	NA	NA	NA	NA	NA	NA	NA	NA	NA	NA	NA
PRJEB6180	ERS468275	International Rice Research Institute	IRGC 43354	IRIS 313-9054	BIDAPIK		NA	NA	Indonesia	2	1	0	3	1	0	0	NA	NA	NA	NA	NA	NA	NA	NA	NA	NA	NA
PRJEB6180	ERS468448	International Rice Research Institute	IRGC 71493	IRIS 313-9050	ANGKARONG		NA	NA	Malaysia	3	1	0	3	1	0	0	NA	NA	NA	NA	NA	NA	NA	NA	NA	NA	NA
PRJEB6180	ERS468273	International Rice Research Institute	IRGC 16650	IRIS 313-9005	TJERE SUGI		NA	NA	Indonesia	2	1	0	3	1	0	0	NA	NA	NA	NA	NA	NA	NA	NA	NA	NA	NA
PRJEB6180	ERS468391	International Rice Research Institute	IRGC 71615	IRIS 313-8987	SERIBU		NA	NA	Malaysia	2	1	0	3	1	0	0	NA	NA	NA	NA	NA	NA	NA	NA	NA	NA	NA
PRJEB6180	ERS468272	International Rice Research Institute	IRGC 66562	IRIS 313-8978	IE MATA CICEM		NA	NA	Indonesia	2	1	0	3	1	0	0	NA	NA	NA	NA	NA	NA	NA	NA	NA	NA	NA
PRJEB6180	ERS467999	International Rice Research Institute	IRGC 20098	IRIS 313-8956	RADEN KARAMUNTING		NA	NA	Indonesia	2	1	0	3	1	0	0	NA	NA	NA	NA	NA	NA	NA	NA	NA	NA	NA
PRJEB6180	ERS468388	International Rice Research Institute	IRGC 44076	IRIS 313-8955	LASAT PUTIH		NA	NA	Malaysia	3	1	0	3	1	0	0	NA	NA	NA	NA	NA	NA	NA	NA	NA	NA	NA
PRJEB6180	ERS467992	International Rice Research Institute	IRGC 36304	IRIS 313-8925	KURULUTUDU		NA	NA	Sri Lanka	2	1	0	3	1	0	0	NA	NA	NA	NA	NA	NA	NA	NA	NA	NA	NA
PRJEB6180	ERS468271	International Rice Research Institute	IRGC 24532	IRIS 313-8922	AGAI 1		NA	NA	Indonesia	2	1	0	3	1	0	0	NA	NA	NA	NA	NA	NA	NA	NA	NA	NA	NA
PRJEB6180	ERS467987	International Rice Research Institute	IRGC 69653	IRIS 313-8909	FAYA MOSHI		NA	NA	Tanzania	2	1	0	3	1	0	0	NA	NA	NA	NA	NA	NA	NA	NA	NA	NA	NA
PRJEB6180	ERS468387	International Rice Research Institute	IRGC 71554	IRIS 313-8894	LEKATAN		NA	NA	Malaysia	3	1	0	3	1	0	0	NA	NA	NA	NA	NA	NA	NA	NA	NA	NA	NA
PRJEB6180	ERS467979	International Rice Research Institute	IRGC 6129	IRIS 313-8846	BAIANG 6		NA	NA	Indonesia	2	1	0	3	1	0	0	NA	NA	NA	NA	NA	NA	NA	NA	NA	NA	NA
PRJEB6180	ERS468269	International Rice Research Institute	IRGC 25734	IRIS 313-8833	SIMET 2		NA	NA	Indonesia	2	1	0	3	1	0	0	NA	NA	NA	NA	NA	NA	NA	NA	NA	NA	NA
PRJEB6180	ERS468268	International Rice Research Institute	IRGC 48730	IRIS 313-8831	KETAN KUNANG KUNENG		NA	NA	Indonesia	2	1	0	3	1	0	0	NA	NA	NA	NA	NA	NA	NA	NA	NA	NA	NA
PRJEB6180	ERS468267	International Rice Research Institute	IRGC 71536	IRIS 313-8811	KATUNG		NA	NA	Malaysia	2	1	0	3	1	0	0	NA	NA	NA	NA	NA	NA	NA	NA	NA	NA	NA
PRJEB6180	ERS467869	International Rice Research Institute	IRGC 43322	IRIS 313-8791	ARANG		NA	NA	Indonesia	2	1	0	3	1	0	0	NA	NA	NA	NA	NA	NA	NA	NA	NA	NA	NA
PRJEB6180	ERS468264	International Rice Research Institute	IRGC 13361	IRIS 313-8781	TAPANG		NA	NA	Malaysia	2	1	0	3	1	0	0	NA	NA	NA	NA	NA	NA	NA	NA	NA	NA	NA
PRJEB6180	ERS467806	International Rice Research Institute	IRGC 57692	IRIS 313-8769	KOSAGI		NA	NA	Guinea	3	1	0	3	1	0	0	NA	NA	NA	NA	NA	NA	NA	NA	NA	NA	NA
PRJEB6180	ERS468381	International Rice Research Institute	IRGC 56698	IRIS 313-8768	MOROFIN		NA	NA	Ivory Coast	3	1	0	3	1	0	0	NA	NA	NA	NA	NA	NA	NA	NA	NA	NA	NA
PRJEB6180	ERS468263	International Rice Research Institute	IRGC 66643	IRIS 313-8767	SIDIK		NA	NA	Indonesia	2	1	0	3	1	0	0	NA	NA	NA	NA	NA	NA	NA	NA	NA	NA	NA
PRJEB6180	ERS467971	International Rice Research Institute	IRGC 18624	IRIS 313-8744	REMOL		NA	NA	Indonesia	2	1	0	3	1	0	0	NA	NA	NA	NA	NA	NA	NA	NA	NA	NA	NA
PRJEB6180	ERS468380	International Rice Research Institute	IRGC 69058	IRIS 313-8739	TAI 6		NA	NA	Ivory Coast	2	1	0	3	1	0	0	NA	NA	NA	NA	NA	NA	NA	NA	NA	NA	NA
PRJEB6180	ERS468259	International Rice Research Institute	IRGC 27393	IRIS 313-8725	PULUT BARAYA		NA	NA	Indonesia	2	1	0	3	1	0	0	NA	NA	NA	NA	NA	NA	NA	NA	NA	NA	NA
PRJEB6180	ERS468257	International Rice Research Institute	IRGC 66603	IRIS 313-8713	NELI		NA	NA	Indonesia	2	1	0	3	1	0	0	NA	NA	NA	NA	NA	NA	NA	NA	NA	NA	NA
PRJEB6180	ERS468457	International Rice Research Institute	IRGC 56735	IRIS 313-8687	KEREN FENHO		NA	NA	Guinea-Bissau	3	1	0	3	1	0	0	NA	NA	NA	NA	NA	NA	NA	NA	NA	NA	NA
PRJEB6180	ERS468253	International Rice Research Institute	IRGC 66497	IRIS 313-8681	KOLITONDO		NA	NA	Guinea	2	1	0	3	1	0	0	NA	NA	NA	NA	NA	NA	NA	NA	NA	NA	NA
PRJEB6180	ERS467837	International Rice Research Institute	IRGC 47383	IRIS 313-8660	KOTTEYARAN		NA	NA	Sri Lanka	2	1	0	3	1	0	0	NA	NA	NA	NA	NA	NA	NA	NA	NA	NA	NA
PRJEB6180	ERS468252	International Rice Research Institute	IRGC 17440	IRIS 313-8643	DAJA		NA	NA	Indonesia	2	1	0	3	1	0	0	NA	NA	NA	NA	NA	NA	NA	NA	NA	NA	NA
PRJEB6180	ERS468379	International Rice Research Institute	IRGC 44069	IRIS 313-8626	BANJANG		NA	NA	Malaysia	3	1	0	3	1	0	0	NA	NA	NA	NA	NA	NA	NA	NA	NA	NA	NA
PRJEB6180	ERS468251	International Rice Research Institute	IRGC 66649	IRIS 313-8608	SI HAO NDURIA		NA	NA	Indonesia	2	1	0	3	1	0	0	NA	NA	NA	NA	NA	NA	NA	NA	NA	NA	NA
PRJEB6180	ERS468250	International Rice Research Institute	IRGC 12768	IRIS 313-8595	MAKALIOKA STANDARD		NA	NA	Madagascar	2	1	0	3	1	0	0	NA	NA	NA	NA	NA	NA	NA	NA	NA	NA	NA
PRJEB6180	ERS468249	International Rice Research Institute	IRGC 13917	IRIS 313-8591	SIAM ER 32		NA	NA	Malaysia	2	1	0	3	1	0	0	NA	NA	NA	NA	NA	NA	NA	NA	NA	NA	NA
PRJEB6180	ERS468248	International Rice Research Institute	IRGC 56171	IRIS 313-8571	ES021(STRAW)		NA	NA	Tanzania	2	1	0	3	1	0	0	NA	NA	NA	NA	NA	NA	NA	NA	NA	NA	NA
PRJEB6180	ERS468247	International Rice Research Institute	IRGC 13892	IRIS 313-8557	SERENDAH SUNGAI DUA 25		NA	NA	Malaysia	2	1	0	3	1	0	0	NA	NA	NA	NA	NA	NA	NA	NA	NA	NA	NA
PRJEB6180	ERS467950	International Rice Research Institute	IRGC 43489	IRIS 313-8536	NG. KARAN DE		NA	NA	Indonesia	2	1	0	3	1	0	0	NA	NA	NA	NA	NA	NA	NA	NA	NA	NA	NA
PRJEB6180	ERS467890	International Rice Research Institute	IRGC 11335	IRIS 313-8523	OS4		NA	NA	Nigeria	3	1	0	3	1	0	0	NA	NA	NA	NA	NA	NA	NA	NA	NA	NA	NA
PRJEB6180	ERS468246	International Rice Research Institute	IRGC 66597	IRIS 313-8493	MELABOH		NA	NA	Indonesia	2	1	0	3	1	0	0	NA	NA	NA	NA	NA	NA	NA	NA	NA	NA	NA
PRJEB6180	ERS468210	International Rice Research Institute	IRGC 71545	IRIS 313-8492	KUNENG		NA	NA	Malaysia	2	1	0	3	1	0	0	NA	NA	NA	NA	NA	NA	NA	NA	NA	NA	NA
PRJEB6180	ERS468245	International Rice Research Institute	IRGC 14087	IRIS 313-8468	LEONG ORN 4135		NA	NA	Malaysia	2	1	0	3	1	0	0	NA	NA	NA	NA	NA	NA	NA	NA	NA	NA	NA
PRJEB6180	ERS468436	International Rice Research Institute	IRGC 60310	IRIS 313-8439	KENDINGA 5(H)		NA	NA	Malaysia	3	1	0	3	1	0	0	NA	NA	NA	NA	NA	NA	NA	NA	NA	NA	NA
PRJEB6180	ERS468242	International Rice Research Institute	IRGC 14146	IRIS 313-8407	NACHIN ER 12		NA	NA	Malaysia	2	1	0	3	1	0	0	NA	NA	NA	NA	NA	NA	NA	NA	NA	NA	NA
PRJEB6180	ERS468434	International Rice Research Institute	IRGC 71598	IRIS 313-8381	PURAK SIRIBA		NA	NA	Malaysia	3	1	0	3	1	0	0	NA	NA	NA	NA	NA	NA	NA	NA	NA	NA	NA
PRJEB6180	ERS467934	International Rice Research Institute	IRGC 18254	IRIS 313-8368	MENTIK TJERE BELUT		NA	NA	Indonesia	2	1	0	3	1	0	0	NA	NA	NA	NA	NA	NA	NA	NA	NA	NA	NA
PRJEB6180	ERS467911	International Rice Research Institute	IRGC 14487	IRIS 313-8316	RADIN PAHANG		NA	NA	Malaysia	2	1	0	3	1	0	0	NA	NA	NA	NA	NA	NA	NA	NA	NA	NA	NA
PRJEB6180	ERS468239	International Rice Research Institute	IRGC 71508	IRIS 313-8312	BATU		NA	NA	Malaysia	2	1	0	3	1	0	0	NA	NA	NA	NA	NA	NA	NA	NA	NA	NA	NA
PRJEB6180	ERS468237	International Rice Research Institute	IRGC 15801	IRIS 313-8293	SAGNADE		NA	NA	Senegal	2	1	0	3	1	0	0	NA	NA	NA	NA	NA	NA	NA	NA	NA	NA	NA
PRJEB6180	ERS468236	International Rice Research Institute	IRGC 66568	IRIS 313-8291	KEDOT		NA	NA	Indonesia	2	1	0	3	1	0	0	NA	NA	NA	NA	NA	NA	NA	NA	NA	NA	NA
PRJEB6180	ERS467866	International Rice Research Institute	IRGC 11000	IRIS 313-8288	AVO		NA	NA	Madagascar	2	1	0	3	1	0	0	NA	NA	NA	NA	NA	NA	NA	NA	NA	NA	NA
PRJEB6180	ERS468432	International Rice Research Institute	IRGC 71612	IRIS 313-8279	SAWAH		NA	NA	Malaysia	3	1	0	3	1	0	0	NA	NA	NA	NA	NA	NA	NA	NA	NA	NA	NA
PRJEB6180	ERS468682	International Rice Research Institute	NA	IRIS 313-8217	SAKHA 102		NA	NA	Egypt	3	1	0	3	1	0	0	NA	NA	NA	NA	NA	NA	NA	NA	NA	NA	NA
PRJEB6180	ERS468644	International Rice Research Institute	NA	IRIS 313-8212	GIZA 178		NA	NA	Egypt	2	1	0	3	1	0	0	NA	NA	NA	NA	NA	NA	NA	NA	NA	NA	NA
PRJEB6180	ERS468621	International Rice Research Institute	NA	IRIS 313-7994	VARY MADINIKA 3566		NA	NA	Madagascar	3	1	0	3	1	0	0	NA	NA	NA	NA	NA	NA	NA	NA	NA	NA	NA
PRJEB6180	ERS468608	International Rice Research Institute	NA	IRIS 313-7993	VARY LAVA DE BETAFO		NA	NA	Madagascar	3	1	0	3	0.999	0	0.001	NA	NA	NA	NA	NA	NA	NA	NA	NA	NA	NA
PRJEB6180	ERS468618	International Rice Research Institute	NA	IRIS 313-7992	VARY LAVA 90		NA	NA	Madagascar	3	1	0	3	1	0	0	NA	NA	NA	NA	NA	NA	NA	NA	NA	NA	NA
PRJEB6180	ERS468615	International Rice Research Institute	NA	IRIS 313-7959	MITSANGANAHIJERY		NA	NA	Madagascar	3	1	0	3	1	0	0	NA	NA	NA	NA	NA	NA	NA	NA	NA	NA	NA
PRJEB6180	ERS468607	International Rice Research Institute	NA	IRIS 313-7914	IRAT 112		NA	NA	Ivory Coast	3	1	0	3	1	0	0	NA	NA	NA	NA	NA	NA	NA	NA	NA	NA	NA
PRJEB6180	ERS468612	International Rice Research Institute	NA	IRIS 313-7912	IRAT 104		NA	NA	Ivory Coast	3	1	0	3	1	0	0	NA	NA	NA	NA	NA	NA	NA	NA	NA	NA	NA
PRJEB6180	ERS468596	International Rice Research Institute	NA	IRIS 313-7859	CIRAD 358		NA	NA	Ivory Coast	3	0.999	0.001	0	1	0	0	NA	NA	NA	NA	NA	NA	NA	NA	NA	NA	NA
PRJEB6180	ERS468614	International Rice Research Institute	NA	IRIS 313-7850	BODA 148-3		NA	NA	Madagascar	3	1	0	3	1	0	0	NA	NA	NA	NA	NA	NA	NA	NA	NA	NA	NA
PRJEB6180	ERS468599	International Rice Research Institute	NA	IRIS 313-7838	62667		NA	NA	Senegal	3	1	0	3	1	0	0	NA	NA	NA	NA	NA	NA	NA	NA	NA	NA	NA
PRJEB6180	ERS468550	International Rice Research Institute	NA	IRIS 313-7832	WAS 63-22-5-9-10-1		NA	NA	Senegal	2	1	0	3	1	0	0	NA	NA	NA	NA	NA	NA	NA	NA	NA	NA	NA
PRJEB6180	ERS468566	International Rice Research Institute	NA	IRIS 313-7826	WAS 33-B-B-15-1-4-5		NA	NA	Senegal	2	1	0	3	1	0	0	NA	NA	NA	NA	NA	NA	NA	NA	NA	NA	NA
PRJEB6180	ERS468583	International Rice Research Institute	NA	IRIS 313-7824	WAS 21-B-B-20-4-3-3		NA	NA	Senegal	2	1	0	3	1	0	0	NA	NA	NA	NA	NA	NA	NA	NA	NA	NA	NA
PRJEB6180	ERS468588	International Rice Research Institute	NA	IRIS 313-7820	WAS 206-B-B-2-2-1		NA	NA	Senegal	2	1	0	3	1	0	0	NA	NA	NA	NA	NA	NA	NA	NA	NA	NA	NA
PRJEB6180	ERS468558	International Rice Research Institute	NA	IRIS 313-7819	WAS 203-B-B-2-4-1		NA	NA	Senegal	2	1	0	3	1	0	0	NA	NA	NA	NA	NA	NA	NA	NA	NA	NA	NA
PRJEB6180	ERS468567	International Rice Research Institute	NA	IRIS 313-7816	WAS 199-B-1-2-1		NA	NA	Senegal	2	1	0	3	1	0	0	NA	NA	NA	NA	NA	NA	NA	NA	NA	NA	NA
PRJEB6180	ERS468585	International Rice Research Institute	NA	IRIS 313-7815	WAS 198-B-3-1-3		NA	NA	Senegal	2	1	0	3	1	0	0	NA	NA	NA	NA	NA	NA	NA	NA	NA	NA	NA
PRJEB6180	ERS468643	International Rice Research Institute	NA	IRIS 313-7809	WAS 174-B-3-5		NA	NA	Senegal	2	1	0	3	1	0	0	NA	NA	NA	NA	NA	NA	NA	NA	NA	NA	NA
PRJEB6180	ERS468552	International Rice Research Institute	NA	IRIS 313-7808	WAS 173-B-B-6-2-2		NA	NA	Senegal	2	1	0	3	1	0	0	NA	NA	NA	NA	NA	NA	NA	NA	NA	NA	NA
PRJEB6180	ERS468569	International Rice Research Institute	NA	IRIS 313-7807	WAS 170-B-B-1-1		NA	NA	Senegal	2	1	0	3	1	0	0	NA	NA	NA	NA	NA	NA	NA	NA	NA	NA	NA
PRJEB6180	ERS468561	International Rice Research Institute	NA	IRIS 313-7799	VARY LAVA DE MAROVATO		NA	NA	Madagascar	2	1	0	3	1	0	0	NA	NA	NA	NA	NA	NA	NA	NA	NA	NA	NA
PRJEB6180	ERS468616	International Rice Research Institute	NA	IRIS 313-7795	TSIPALA MENA 626		NA	NA	Madagascar	2	1	0	3	1	0	0	NA	NA	NA	NA	NA	NA	NA	NA	NA	NA	NA
PRJEB6180	ERS468563	International Rice Research Institute	NA	IRIS 313-7793	TSIPALA B160		NA	NA	Madagascar	2	1	0	3	1	0	0	NA	NA	NA	NA	NA	NA	NA	NA	NA	NA	NA
PRJEB6180	ERS468587	International Rice Research Institute	NA	IRIS 313-7792	TSIPALA 1231		NA	NA	Madagascar	2	1	0	3	1	0	0	NA	NA	NA	NA	NA	NA	NA	NA	NA	NA	NA
PRJEB6180	ERS468575	International Rice Research Institute	NA	IRIS 313-7773	SEBERANG MR77		NA	NA	Mali	2	1	0	3	1	0	0	NA	NA	NA	NA	NA	NA	NA	NA	NA	NA	NA
PRJEB6180	ERS468580	International Rice Research Institute	NA	IRIS 313-7770	SAMBALA MALO		NA	NA	Mali	2	1	0	3	0.998	0.001	0.001	NA	NA	NA	NA	NA	NA	NA	NA	NA	NA	NA
PRJEB6180	ERS468591	International Rice Research Institute	NA	IRIS 313-7766	SAHEL 108		NA	NA	Senegal	2	1	0	3	1	0	0	NA	NA	NA	NA	NA	NA	NA	NA	NA	NA	NA
PRJEB6180	ERS468593	International Rice Research Institute	NA	IRIS 313-7758	ROJOKELY		NA	NA	Madagascar	2	1	0	3	1	0	0	NA	NA	NA	NA	NA	NA	NA	NA	NA	NA	NA
PRJEB6180	ERS468571	International Rice Research Institute	NA	IRIS 313-7728	MAMORIAKA 114		NA	NA	Madagascar	2	1	0	3	1	0	0	NA	NA	NA	NA	NA	NA	NA	NA	NA	NA	NA
PRJEB6180	ERS468555	International Rice Research Institute	NA	IRIS 313-7725	MADINIKA 1329		NA	NA	Madagascar	2	1	0	3	1	0	0	NA	NA	NA	NA	NA	NA	NA	NA	NA	NA	NA
PRJEB6180	ERS468626	International Rice Research Institute	NA	IRIS 313-7722	LATSIBOZAKA 112-1		NA	NA	Madagascar	3	1	0	3	1	0	0	NA	NA	NA	NA	NA	NA	NA	NA	NA	NA	NA
PRJEB6180	ERS468574	International Rice Research Institute	NA	IRIS 313-7720	LAITRA		NA	NA	Madagascar	2	1	0	3	1	0	0	NA	NA	NA	NA	NA	NA	NA	NA	NA	NA	NA
PRJEB6180	ERS468634	International Rice Research Institute	NA	IRIS 313-7719	KOGONI 91-1		NA	NA	Mali	2	1	0	3	1	0	0	NA	NA	NA	NA	NA	NA	NA	NA	NA	NA	NA
PRJEB6180	ERS468556	International Rice Research Institute	NA	IRIS 313-7681	H15-23-DA		NA	NA	Mali	2	1	0	3	1	0	0	NA	NA	NA	NA	NA	NA	NA	NA	NA	NA	NA
PRJEB6180	ERS468579	International Rice Research Institute	NA	IRIS 313-7654	BOUAKE 189		NA	NA	Ivory Coast	2	1	0	3	1	0	0	NA	NA	NA	NA	NA	NA	NA	NA	NA	NA	NA
PRJEB6180	ERS468577	International Rice Research Institute	NA	IRIS 313-7651	BOTRA MAITSO		NA	NA	Madagascar	2	1	0	3	1	0	0	NA	NA	NA	NA	NA	NA	NA	NA	NA	NA	NA
PRJEB6180	ERS468584	International Rice Research Institute	NA	IRIS 313-7650	BOTOHAVANA 139		NA	NA	Madagascar	2	1	0	3	1	0	0	NA	NA	NA	NA	NA	NA	NA	NA	NA	NA	NA
PRJEB6180	ERS468592	International Rice Research Institute	NA	IRIS 313-7646	BETSILAIZINA		NA	NA	Madagascar	2	1	0	3	1	0	0	NA	NA	NA	NA	NA	NA	NA	NA	NA	NA	NA
PRJEB6180	ERS468589	International Rice Research Institute	NA	IRIS 313-7641	B 6144-MR-6-0-0		NA	NA	Indonesia	2	1	0	3	1	0	0	NA	NA	NA	NA	NA	NA	NA	NA	NA	NA	NA
PRJEB6180	ERS468568	International Rice Research Institute	NA	IRIS 313-7638	ANGIFOTSY 685		NA	NA	Madagascar	2	1	0	3	1	0	0	NA	NA	NA	NA	NA	NA	NA	NA	NA	NA	NA
PRJEB6180	ERS468573	International Rice Research Institute	NA	IRIS 313-7636	ADNY 11		NA	NA	Mali	2	1	0	3	1	0	0	NA	NA	NA	NA	NA	NA	NA	NA	NA	NA	NA
PRJEB6180	ERS467762	International Rice Research Institute	NA	IRIS 313-15905	WAB 56-125		NA	NA	Ivory Coast	3	1	0	3	1	0	0	NA	NA	NA	NA	NA	NA	NA	NA	NA	NA	NA
PRJEB6180	ERS469302	International Rice Research Institute	IRGC 97366	IRIS 313-12285	PADI MIAT (KECIL)		NA	NA	Malaysia	3	1	0	3	1	0	0	NA	NA	NA	NA	NA	NA	NA	NA	NA	NA	NA
PRJEB6180	ERS469301	International Rice Research Institute	IRGC 97308	IRIS 313-12284	VARY GONY		NA	NA	Madagascar	2	1	0	3	1	0	0	NA	NA	NA	NA	NA	NA	NA	NA	NA	NA	NA
PRJEB6180	ERS469300	International Rice Research Institute	IRGC 97235	IRIS 313-12283	VARY 5000 FOTSY		NA	NA	Madagascar	2	1	0	3	1	0	0	NA	NA	NA	NA	NA	NA	NA	NA	NA	NA	NA
PRJEB6180	ERS469299	International Rice Research Institute	IRGC 97233	IRIS 313-12282	TSY MILA RO		NA	NA	Madagascar	2	1	0	3	1	0	0	NA	NA	NA	NA	NA	NA	NA	NA	NA	NA	NA
PRJEB6180	ERS469298	International Rice Research Institute	IRGC 97219	IRIS 313-12281	SALAZANA		NA	NA	Madagascar	3	1	0	3	1	0	0	NA	NA	NA	NA	NA	NA	NA	NA	NA	NA	NA
PRJEB6180	ERS469297	International Rice Research Institute	IRGC 97193	IRIS 313-12280	MAKALIOKA		NA	NA	Madagascar	2	1	0	3	1	0	0	NA	NA	NA	NA	NA	NA	NA	NA	NA	NA	NA
PRJEB6180	ERS469296	International Rice Research Institute	IRGC 97124	IRIS 313-12279	RAMADITRA		NA	NA	Madagascar	3	1	0	3	1	0	0	NA	NA	NA	NA	NA	NA	NA	NA	NA	NA	NA
PRJEB6180	ERS469229	International Rice Research Institute	IRGC 86436	IRIS 313-12135	PERUBAK LUEY		NA	NA	Malaysia	2	1	0	3	1	0	0	NA	NA	NA	NA	NA	NA	NA	NA	NA	NA	NA
PRJEB6180	ERS469218	International Rice Research Institute	IRGC 84756	IRIS 313-12118	OVIBENAMPOTAKA + OVIBE + MAKALIOKA		NA	NA	Madagascar	2	1	0	3	1	0	0	NA	NA	NA	NA	NA	NA	NA	NA	NA	NA	NA
PRJEB6180	ERS469215	International Rice Research Institute	IRGC 84215	IRIS 313-12108	PARAI JALEY MASIK		NA	NA	Malaysia	3	1	0	3	1	0	0	NA	NA	NA	NA	NA	NA	NA	NA	NA	NA	NA
PRJEB6180	ERS469207	International Rice Research Institute	IRGC 83154	IRIS 313-12083	SARIN-TSIPALA		NA	NA	Madagascar	2	1	0	3	1	0	0	NA	NA	NA	NA	NA	NA	NA	NA	NA	NA	NA
PRJEB6180	ERS469206	International Rice Research Institute	IRGC 83137	IRIS 313-12082	MAVOLATSIKA		NA	NA	Madagascar	2	1	0	3	1	0	0	NA	NA	NA	NA	NA	NA	NA	NA	NA	NA	NA
PRJEB6180	ERS469202	International Rice Research Institute	IRGC 82688	IRIS 313-12070	BABELIONG		NA	NA	Malaysia	3	1	0	3	1	0	0	NA	NA	NA	NA	NA	NA	NA	NA	NA	NA	NA
PRJEB6180	ERS469160	International Rice Research Institute	IRGC 80233	IRIS 313-12027	ACEH(SELECTION)		NA	NA	Indonesia	2	1	0	3	1	0	0	NA	NA	NA	NA	NA	NA	NA	NA	NA	NA	NA
PRJEB6180	ERS469158	International Rice Research Institute	IRGC 80025	IRIS 313-12021	ITA 131		NA	NA	Nigeria	3	1	0	3	1	0	0	NA	NA	NA	NA	NA	NA	NA	NA	NA	NA	NA
PRJEB6180	ERS469157	International Rice Research Institute	IRGC 79983	IRIS 313-12018	FRENSI GBOI		NA	NA	Sierra Leone	3	1	0	3	1	0	0	NA	NA	NA	NA	NA	NA	NA	NA	NA	NA	NA
PRJEB6180	ERS469155	International Rice Research Institute	IRGC 79964	IRIS 313-12017	EX SANDEMA		NA	NA	Ghana	2	1	0	3	1	0	0	NA	NA	NA	NA	NA	NA	NA	NA	NA	NA	NA
PRJEB6180	ERS469154	International Rice Research Institute	IRGC 79898	IRIS 313-12016	EX AUBERGE		NA	NA	Egypt	2	1	0	3	1	0	0	NA	NA	NA	NA	NA	NA	NA	NA	NA	NA	NA
PRJEB6180	ERS469153	International Rice Research Institute	IRGC 79882	IRIS 313-12015	DOGON IRI		NA	NA	Nigeria	2	1	0	3	1	0	0	NA	NA	NA	NA	NA	NA	NA	NA	NA	NA	NA
PRJEB6180	ERS469152	International Rice Research Institute	IRGC 79842	IRIS 313-12014	ADANKARU		NA	NA	Nigeria	2	1	0	3	1	0	0	NA	NA	NA	NA	NA	NA	NA	NA	NA	NA	NA
PRJEB6180	ERS469144	International Rice Research Institute	IRGC 79507	IRIS 313-12006	PADI HANGIR		NA	NA	Malaysia	3	1	0	3	1	0	0	NA	NA	NA	NA	NA	NA	NA	NA	NA	NA	NA
PRJEB6180	ERS469143	International Rice Research Institute	IRGC 79480	IRIS 313-12005	CHE MAH		NA	NA	Malaysia	2	1	0	3	1	0	0	NA	NA	NA	NA	NA	NA	NA	NA	NA	NA	NA
PRJEB6180	ERS469126	International Rice Research Institute	IRGC 78677	IRIS 313-11988	POTOQOIN		NA	NA	Sierra Leone	2	1	0	3	1	0	0	NA	NA	NA	NA	NA	NA	NA	NA	NA	NA	NA
PRJEB6180	ERS469123	International Rice Research Institute	IRGC 77867	IRIS 313-11977	MAMORIAKA		NA	NA	Madagascar	2	1	0	3	1	0	0	NA	NA	NA	NA	NA	NA	NA	NA	NA	NA	NA
PRJEB6180	ERS469122	International Rice Research Institute	IRGC 77811	IRIS 313-11976	PA MATIS		NA	NA	Sierra Leone	2	1	0	3	1	0	0	NA	NA	NA	NA	NA	NA	NA	NA	NA	NA	NA
PRJEB6180	ERS469077	International Rice Research Institute	IRGC 75279	IRIS 313-11932	SINDANO3		NA	NA	Kenya	2	1	0	3	1	0	0	NA	NA	NA	NA	NA	NA	NA	NA	NA	NA	NA
PRJEB6180	ERS469075	International Rice Research Institute	IRGC 75235	IRIS 313-11930	ITA 117		NA	NA	Nigeria	2	1	0	3	1	0	0	NA	NA	NA	NA	NA	NA	NA	NA	NA	NA	NA
PRJEB6180	ERS469059	International Rice Research Institute	IRGC 74677	IRIS 313-11915	IB95		NA	NA	Ghana	3	1	0	3	1	0	0	NA	NA	NA	NA	NA	NA	NA	NA	NA	NA	NA
PRJEB6180	ERS469002	International Rice Research Institute	IRGC 71834	IRIS 313-11850	SESAT JADI		NA	NA	Malaysia	2	1	0	3	1	0	0	NA	NA	NA	NA	NA	NA	NA	NA	NA	NA	NA
PRJEB6180	ERS469001	International Rice Research Institute	IRGC 71820	IRIS 313-11849	PULUT SELEMYAM		NA	NA	Malaysia	2	1	0	3	1	0	0	NA	NA	NA	NA	NA	NA	NA	NA	NA	NA	NA
PRJEB6180	ERS469000	International Rice Research Institute	IRGC 71655	IRIS 313-11848	PULUT BURUNG		NA	NA	Malaysia	2	1	0	3	1	0	0	NA	NA	NA	NA	NA	NA	NA	NA	NA	NA	NA
PRJEB6180	ERS468981	International Rice Research Institute	IRGC 70961	IRIS 313-11830	KANDEKE YAIGAITI		NA	NA	Gambia	2	1	0	3	1	0	0	NA	NA	NA	NA	NA	NA	NA	NA	NA	NA	NA
PRJEB6180	ERS468965	International Rice Research Institute	IRGC 70730	IRIS 313-11815	MOSHI		NA	NA	Kenya	2	1	0	3	1	0	0	NA	NA	NA	NA	NA	NA	NA	NA	NA	NA	NA
PRJEB6180	ERS468964	International Rice Research Institute	IRGC 70722	IRIS 313-11814	KIKUBA		NA	NA	Kenya	2	1	0	3	1	0	0	NA	NA	NA	NA	NA	NA	NA	NA	NA	NA	NA
PRJEB6180	ERS468963	International Rice Research Institute	IRGC 70707	IRIS 313-11813	ZERO		NA	NA	Kenya	2	1	0	3	1	0	0	NA	NA	NA	NA	NA	NA	NA	NA	NA	NA	NA
PRJEB6180	ERS468962	International Rice Research Institute	IRGC 70650	IRIS 313-11812	ASFALA		NA	NA	Kenya	2	1	0	3	1	0	0	NA	NA	NA	NA	NA	NA	NA	NA	NA	NA	NA
PRJEB6180	ERS468961	International Rice Research Institute	IRGC 70648	IRIS 313-11811	MOSHI		NA	NA	Kenya	2	1	0	3	1	0	0	NA	NA	NA	NA	NA	NA	NA	NA	NA	NA	NA
PRJEB6180	ERS468959	International Rice Research Institute	IRGC 70647	IRIS 313-11810	PULURE		NA	NA	Kenya	2	1	0	3	1	0	0	NA	NA	NA	NA	NA	NA	NA	NA	NA	NA	NA
PRJEB6180	ERS468958	International Rice Research Institute	IRGC 70612	IRIS 313-11809	MHARAKA		NA	NA	Kenya	2	1	0	3	1	0	0	NA	NA	NA	NA	NA	NA	NA	NA	NA	NA	NA
PRJEB6180	ERS468971	International Rice Research Institute	IRGC 69979	IRIS 313-11794	TSIPALA MENAHAR		NA	NA	Madagascar	2	1	0	3	1	0	0	NA	NA	NA	NA	NA	NA	NA	NA	NA	NA	NA
PRJEB6180	ERS468960	International Rice Research Institute	IRGC 69958	IRIS 313-11793	KOMALIOKO		NA	NA	Madagascar	2	1	0	3	1	0	0	NA	NA	NA	NA	NA	NA	NA	NA	NA	NA	NA
PRJEB6180	ERS468949	International Rice Research Institute	IRGC 69947	IRIS 313-11792	VONBOANGY		NA	NA	Madagascar	3	1	0	3	1	0	0	NA	NA	NA	NA	NA	NA	NA	NA	NA	NA	NA
PRJEB6180	ERS468948	International Rice Research Institute	IRGC 69908	IRIS 313-11791	VARY LAHY		NA	NA	Madagascar	2	1	0	3	1	0	0	NA	NA	NA	NA	NA	NA	NA	NA	NA	NA	NA
PRJEB6180	ERS468947	International Rice Research Institute	IRGC 69897	IRIS 313-11790	VARIRANGAHY		NA	NA	Madagascar	3	1	0	3	1	0	0	NA	NA	NA	NA	NA	NA	NA	NA	NA	NA	NA
PRJEB6180	ERS468946	International Rice Research Institute	IRGC 69875	IRIS 313-11789	SABORAMANDALOAFO		NA	NA	Madagascar	2	1	0	3	1	0	0	NA	NA	NA	NA	NA	NA	NA	NA	NA	NA	NA
PRJEB6180	ERS468943	International Rice Research Institute	IRGC 69793	IRIS 313-11787	TANDAKAY FINGO		NA	NA	Gambia	2	1	0	3	1	0	0	NA	NA	NA	NA	NA	NA	NA	NA	NA	NA	NA
PRJEB6180	ERS468941	International Rice Research Institute	IRGC 69737	IRIS 313-11785	MOSHI		NA	NA	Tanzania	2	1	0	3	1	0	0	NA	NA	NA	NA	NA	NA	NA	NA	NA	NA	NA
PRJEB6180	ERS468940	International Rice Research Institute	IRGC 69730	IRIS 313-11784	MBEIMBEIHUN		NA	NA	Sierra Leone	2	1	0	3	1	0	0	NA	NA	NA	NA	NA	NA	NA	NA	NA	NA	NA
PRJEB6180	ERS468939	International Rice Research Institute	IRGC 69720	IRIS 313-11783	MAMA TABALI		NA	NA	Gambia	2	1	0	3	1	0	0	NA	NA	NA	NA	NA	NA	NA	NA	NA	NA	NA
PRJEB6180	ERS468938	International Rice Research Institute	IRGC 69717	IRIS 313-11782	MALAGASY		NA	NA	Zambia	2	1	0	3	1	0	0	NA	NA	NA	NA	NA	NA	NA	NA	NA	NA	NA
PRJEB6180	ERS468937	International Rice Research Institute	IRGC 69698	IRIS 313-11780	KILOMBERO		NA	NA	Tanzania	2	1	0	3	1	0	0	NA	NA	NA	NA	NA	NA	NA	NA	NA	NA	NA
PRJEB6180	ERS468936	International Rice Research Institute	IRGC 69695	IRIS 313-11779	KATUMANI		NA	NA	Tanzania	2	1	0	3	1	0	0	NA	NA	NA	NA	NA	NA	NA	NA	NA	NA	NA
PRJEB6180	ERS468934	International Rice Research Institute	IRGC 69464	IRIS 313-11773	AUS 78-125		NA	NA	Gambia	2	1	0	3	1	0	0	NA	NA	NA	NA	NA	NA	NA	NA	NA	NA	NA
PRJEB6180	ERS468933	International Rice Research Institute	IRGC 69410	IRIS 313-11772	ROJON'NY NTAOLO		NA	NA	Madagascar	2	1	0	3	1	0	0	NA	NA	NA	NA	NA	NA	NA	NA	NA	NA	NA
PRJEB6180	ERS468931	International Rice Research Institute	IRGC 69101	IRIS 313-11767	VARY LAVA DE BOLOGNE		NA	NA	Madagascar	2	1	0	3	1	0	0	NA	NA	NA	NA	NA	NA	NA	NA	NA	NA	NA
PRJEB6180	ERS468930	International Rice Research Institute	IRGC 69074	IRIS 313-11766	TSIMIAKABIJA		NA	NA	Madagascar	2	1	0	3	1	0	0	NA	NA	NA	NA	NA	NA	NA	NA	NA	NA	NA
PRJEB6180	ERS468926	International Rice Research Institute	IRGC 68947	IRIS 313-11762	NS1515		NA	NA	Madagascar	2	1	0	3	1	0	0	NA	NA	NA	NA	NA	NA	NA	NA	NA	NA	NA
PRJEB6180	ERS468925	International Rice Research Institute	IRGC 68864	IRIS 313-11761	NS199		NA	NA	Ivory Coast	2	1	0	3	1	0	0	NA	NA	NA	NA	NA	NA	NA	NA	NA	NA	NA
PRJEB6180	ERS468924	International Rice Research Institute	IRGC 68709	IRIS 313-11760	MENAHARA 505		NA	NA	Madagascar	2	1	0	3	1	0	0	NA	NA	NA	NA	NA	NA	NA	NA	NA	NA	NA
PRJEB6180	ERS468923	International Rice Research Institute	IRGC 68552	IRIS 313-11759	K 2 C 45		NA	NA	Ivory Coast	3	1	0	3	1	0	0	NA	NA	NA	NA	NA	NA	NA	NA	NA	NA	NA
PRJEB6180	ERS468922	International Rice Research Institute	IRGC 68438	IRIS 313-11758	FOFFI		NA	NA	Ivory Coast	2	1	0	3	1	0	0	NA	NA	NA	NA	NA	NA	NA	NA	NA	NA	NA
PRJEB6180	ERS468920	International Rice Research Institute	IRGC 68382	IRIS 313-11757	BORIZINA 640		NA	NA	Madagascar	2	1	0	3	1	0	0	NA	NA	NA	NA	NA	NA	NA	NA	NA	NA	NA
PRJEB6180	ERS468919	International Rice Research Institute	IRGC 68370	IRIS 313-11756	BENGALI VAKAHANA 1448		NA	NA	Madagascar	3	1	0	3	1	0	0	NA	NA	NA	NA	NA	NA	NA	NA	NA	NA	NA
PRJEB6180	ERS468917	International Rice Research Institute	IRGC 68330	IRIS 313-11754	AMBOHIMANDAY		NA	NA	Madagascar	3	1	0	3	1	0	0	NA	NA	NA	NA	NA	NA	NA	NA	NA	NA	NA
PRJEB6180	ERS468904	International Rice Research Institute	IRGC 67604	IRIS 313-11740	UGAGA		NA	NA	Ghana	2	1	0	3	1	0	0	NA	NA	NA	NA	NA	NA	NA	NA	NA	NA	NA
PRJEB6180	ERS468903	International Rice Research Institute	IRGC 67594	IRIS 313-11739	NAKPUI		NA	NA	Ghana	3	1	0	3	1	0	0	NA	NA	NA	NA	NA	NA	NA	NA	NA	NA	NA
PRJEB6180	ERS468887	International Rice Research Institute	IRGC 66931	IRIS 313-11724	KONYAN		NA	NA	Guinea	2	1	0	3	1	0	0	NA	NA	NA	NA	NA	NA	NA	NA	NA	NA	NA
PRJEB6180	ERS468886	International Rice Research Institute	IRGC 66916	IRIS 313-11723	DISSIGBE		NA	NA	Guinea	2	1	0	3	1	0	0	NA	NA	NA	NA	NA	NA	NA	NA	NA	NA	NA
PRJEB6180	ERS468880	International Rice Research Institute	IRGC 66565	IRIS 313-11717	JATI MANI		NA	NA	Indonesia	2	1	0	3	1	0	0	NA	NA	NA	NA	NA	NA	NA	NA	NA	NA	NA
PRJEB6180	ERS468879	International Rice Research Institute	IRGC 66478	IRIS 313-11716	SOSSOKA		NA	NA	Guinea	2	1	0	3	1	0	0	NA	NA	NA	NA	NA	NA	NA	NA	NA	NA	NA
PRJEB6180	ERS468839	International Rice Research Institute	IRGC 63511	IRIS 313-11663	MARHARORA		NA	NA	Zimbabwe	2	1	0	3	1	0	0	NA	NA	NA	NA	NA	NA	NA	NA	NA	NA	NA
PRJEB6180	ERS468836	International Rice Research Institute	IRGC 63433	IRIS 313-11659	TOBOHUN		NA	NA	Sierra Leone	3	1	0	3	1	0	0	NA	NA	NA	NA	NA	NA	NA	NA	NA	NA	NA
PRJEB6180	ERS468835	International Rice Research Institute	IRGC 63350	IRIS 313-11658	MANYALOJOPOIHUN		NA	NA	Sierra Leone	3	1	0	3	1	0	0	NA	NA	NA	NA	NA	NA	NA	NA	NA	NA	NA
PRJEB6180	ERS468834	International Rice Research Institute	IRGC 63214	IRIS 313-11657	EX WUKARI(WILD)		NA	NA	Nigeria	2	1	0	3	1	0	0	NA	NA	NA	NA	NA	NA	NA	NA	NA	NA	NA
PRJEB6180	ERS468833	International Rice Research Institute	IRGC 63099	IRIS 313-11656	B 3913 B 16-20 ST 28		NA	NA	Indonesia	2	1	0	3	1	0	0	NA	NA	NA	NA	NA	NA	NA	NA	NA	NA	NA
PRJEB6180	ERS468780	International Rice Research Institute	IRGC 60427	IRIS 313-11591	PULUT MERAH 2		NA	NA	Malaysia	2	1	0	3	1	0	0	NA	NA	NA	NA	NA	NA	NA	NA	NA	NA	NA
PRJEB6180	ERS468752	International Rice Research Institute	IRGC 58656	IRIS 313-11555	PA WOON		NA	NA	Sierra Leone	2	1	0	3	1	0	0	NA	NA	NA	NA	NA	NA	NA	NA	NA	NA	NA
PRJEB6180	ERS468751	International Rice Research Institute	IRGC 58609	IRIS 313-11554	PA RABICHINA		NA	NA	Sierra Leone	2	1	0	3	1	0	0	NA	NA	NA	NA	NA	NA	NA	NA	NA	NA	NA
PRJEB6180	ERS468749	International Rice Research Institute	IRGC 58443	IRIS 313-11551	FELEGBASEH		NA	NA	Sierra Leone	2	1	0	3	0.992	0.003	0.005	NA	NA	NA	NA	NA	NA	NA	NA	NA	NA	NA
PRJEB6180	ERS468738	International Rice Research Institute	IRGC 57686	IRIS 313-11540	PATIE ROUGE		NA	NA	Guinea	3	1	0	3	1	0	0	NA	NA	NA	NA	NA	NA	NA	NA	NA	NA	NA
PRJEB6180	ERS468729	International Rice Research Institute	IRGC 56914	IRIS 313-11528	ZO		NA	NA	Ivory Coast	2	1	0	3	1	0	0	NA	NA	NA	NA	NA	NA	NA	NA	NA	NA	NA
PRJEB6180	ERS468728	International Rice Research Institute	IRGC 56856	IRIS 313-11527	GOLO		NA	NA	Ivory Coast	3	1	0	3	1	0	0	NA	NA	NA	NA	NA	NA	NA	NA	NA	NA	NA
PRJEB6180	ERS468727	International Rice Research Institute	IRGC 56767	IRIS 313-11526	FOSSA(GBE)		NA	NA	Ivory Coast	3	1	0	3	1	0	0	NA	NA	NA	NA	NA	NA	NA	NA	NA	NA	NA
PRJEB6180	ERS468725	International Rice Research Institute	IRGC 56663	IRIS 313-11524	KOUINONEPOU		NA	NA	Ivory Coast	3	1	0	3	1	0	0	NA	NA	NA	NA	NA	NA	NA	NA	NA	NA	NA
PRJEB6180	ERS468724	International Rice Research Institute	IRGC 56264	IRIS 313-11523	ADIALLO		NA	NA	Senegal	2	1	0	3	1	0	0	NA	NA	NA	NA	NA	NA	NA	NA	NA	NA	NA
PRJEB6180	ERS468719	International Rice Research Institute	IRGC 55305	IRIS 313-11510	A 69-1		NA	NA	Sri Lanka	2	1	0	3	0.994	0.003	0.003	NA	NA	NA	NA	NA	NA	NA	NA	NA	NA	NA
PRJEB6180	ERS468712	International Rice Research Institute	IRGC 54356	IRIS 313-11500	SKK		NA	NA	Indonesia	2	1	0	3	1	0	0	NA	NA	NA	NA	NA	NA	NA	NA	NA	NA	NA
PRJEB6180	ERS468711	International Rice Research Institute	IRGC 54295	IRIS 313-11499	PADI UDANG		NA	NA	Indonesia	3	1	0	3	1	0	0	NA	NA	NA	NA	NA	NA	NA	NA	NA	NA	NA
PRJEB6180	ERS468707	International Rice Research Institute	IRGC 54158	IRIS 313-11496	BALU PRIA		NA	NA	Indonesia	3	1	0	3	1	0	0	NA	NA	NA	NA	NA	NA	NA	NA	NA	NA	NA
PRJEB6180	ERS468653	International Rice Research Institute	IRGC 50880	IRIS 313-11436	SAKAZELE(538)		NA	NA	Ivory Coast	3	1	0	3	1	0	0	NA	NA	NA	NA	NA	NA	NA	NA	NA	NA	NA
PRJEB6180	ERS468652	International Rice Research Institute	IRGC 50873	IRIS 313-11435	MONMINEUPLEU		NA	NA	Ivory Coast	3	1	0	3	1	0	0	NA	NA	NA	NA	NA	NA	NA	NA	NA	NA	NA
PRJEB6180	ERS470169	International Rice Research Institute	IRGC 46985	IRIS 313-11376	TOS 7536		NA	NA	Ivory Coast	3	1	0	3	1	0	0	NA	NA	NA	NA	NA	NA	NA	NA	NA	NA	NA
PRJEB6180	ERS470122	International Rice Research Institute	IRGC 44084	IRIS 313-11329	PADI JALAI BELA		NA	NA	Malaysia	3	1	0	3	1	0	0	NA	NA	NA	NA	NA	NA	NA	NA	NA	NA	NA
PRJEB6180	ERS470121	International Rice Research Institute	IRGC 44081	IRIS 313-11328	PADI BURIH		NA	NA	Malaysia	3	1	0	3	1	0	0	NA	NA	NA	NA	NA	NA	NA	NA	NA	NA	NA
PRJEB6180	ERS469895	International Rice Research Institute	IRGC 30595	IRIS 313-11099	PECALO		NA	NA	Sierra Leone	2	1	0	3	1	0	0	NA	NA	NA	NA	NA	NA	NA	NA	NA	NA	NA
PRJEB6180	ERS469893	International Rice Research Institute	IRGC 30463	IRIS 313-11098	KOLUBA		NA	NA	Sierra Leone	2	1	0	3	1	0	0	NA	NA	NA	NA	NA	NA	NA	NA	NA	NA	NA
PRJEB6180	ERS469846	International Rice Research Institute	IRGC 28715	IRIS 313-11046	LALANGIT		NA	NA	Malaysia	3	1	0	3	1	0	0	NA	NA	NA	NA	NA	NA	NA	NA	NA	NA	NA
PRJEB6180	ERS469844	International Rice Research Institute	IRGC 28694	IRIS 313-11045	ENGKABANG		NA	NA	Malaysia	3	1	0	3	1	0	0	NA	NA	NA	NA	NA	NA	NA	NA	NA	NA	NA
PRJEB6180	ERS469843	International Rice Research Institute	IRGC 28683	IRIS 313-11044	BUKU		NA	NA	Malaysia	3	1	0	3	1	0	0	NA	NA	NA	NA	NA	NA	NA	NA	NA	NA	NA
PRJEB6180	ERS469842	International Rice Research Institute	IRGC 28666	IRIS 313-11043	BENGKA KERSEK		NA	NA	Malaysia	2	1	0	3	1	0	0	NA	NA	NA	NA	NA	NA	NA	NA	NA	NA	NA
PRJEB6180	ERS469878	International Rice Research Institute	IRGC 26988	IRIS 313-10995	ASE BAKKA LOMPO		NA	NA	Indonesia	2	1	0	3	1	0	0	NA	NA	NA	NA	NA	NA	NA	NA	NA	NA	NA
PRJEB6180	ERS469537	International Rice Research Institute	IRGC 16102	IRIS 313-10730	NANIBRE		NA	NA	Ivory Coast	3	1	0	3	1	0	0	NA	NA	NA	NA	NA	NA	NA	NA	NA	NA	NA
PRJEB6180	ERS469535	International Rice Research Institute	IRGC 16046	IRIS 313-10728	OUSSANTHIABA		NA	NA	Senegal	2	1	0	3	1	0	0	NA	NA	NA	NA	NA	NA	NA	NA	NA	NA	NA
PRJEB6180	ERS469534	International Rice Research Institute	IRGC 16011	IRIS 313-10727	KOUPENEDOU KOUBOURY		NA	NA	Senegal	2	1	0	3	1	0	0	NA	NA	NA	NA	NA	NA	NA	NA	NA	NA	NA
PRJEB6180	ERS469532	International Rice Research Institute	IRGC 15986	IRIS 313-10726	POTO BALA		NA	NA	Senegal	2	1	0	3	1	0	0	NA	NA	NA	NA	NA	NA	NA	NA	NA	NA	NA
PRJEB6180	ERS469531	International Rice Research Institute	IRGC 15884	IRIS 313-10725	ERNEST		NA	NA	Senegal	2	1	0	3	1	0	0	NA	NA	NA	NA	NA	NA	NA	NA	NA	NA	NA
PRJEB6180	ERS469530	International Rice Research Institute	IRGC 15866	IRIS 313-10724	MOUSOIR		NA	NA	Senegal	2	1	0	3	1	0	0	NA	NA	NA	NA	NA	NA	NA	NA	NA	NA	NA
PRJEB6180	ERS469529	International Rice Research Institute	IRGC 15813	IRIS 313-10723	MOND-BA		NA	NA	Senegal	2	1	0	3	1	0	0	NA	NA	NA	NA	NA	NA	NA	NA	NA	NA	NA
PRJEB6180	ERS469566	International Rice Research Institute	IRGC 15155	IRIS 313-10712	KOTO OURA S 5		NA	NA	Ivory Coast	3	1	0	3	1	0	0	NA	NA	NA	NA	NA	NA	NA	NA	NA	NA	NA
PRJEB6180	ERS469522	International Rice Research Institute	IRGC 14491	IRIS 313-10707	ANAK DIDEK		NA	NA	Malaysia	2	1	0	3	1	0	0	NA	NA	NA	NA	NA	NA	NA	NA	NA	NA	NA
PRJEB6180	ERS469521	International Rice Research Institute	IRGC 14479	IRIS 313-10706	ANAK CHINA		NA	NA	Malaysia	2	1	0	3	1	0	0	NA	NA	NA	NA	NA	NA	NA	NA	NA	NA	NA
PRJEB6180	ERS469519	International Rice Research Institute	IRGC 14373	IRIS 313-10704	PADI DARAWAL		NA	NA	Malaysia	3	1	0	3	1	0	0	NA	NA	NA	NA	NA	NA	NA	NA	NA	NA	NA
PRJEB6180	ERS469518	International Rice Research Institute	IRGC 14356	IRIS 313-10703	PADI ADONG DUMARAT		NA	NA	Malaysia	3	1	0	3	1	0	0	NA	NA	NA	NA	NA	NA	NA	NA	NA	NA	NA
PRJEB6180	ERS469517	International Rice Research Institute	IRGC 14272	IRIS 313-10702	JAROM EMAS		NA	NA	Malaysia	2	1	0	3	1	0	0	NA	NA	NA	NA	NA	NA	NA	NA	NA	NA	NA
PRJEB6180	ERS469516	International Rice Research Institute	IRGC 14204	IRIS 313-10701	RADIN EBOS 35		NA	NA	Malaysia	2	1	0	3	1	0	0	NA	NA	NA	NA	NA	NA	NA	NA	NA	NA	NA
PRJEB6180	ERS469515	International Rice Research Institute	IRGC 14045	IRIS 313-10700	CHANTEK 145		NA	NA	Malaysia	2	1	0	3	1	0	0	NA	NA	NA	NA	NA	NA	NA	NA	NA	NA	NA
PRJEB6180	ERS469514	International Rice Research Institute	IRGC 14040	IRIS 313-10699	BUJANG		NA	NA	Malaysia	2	1	0	3	1	0	0	NA	NA	NA	NA	NA	NA	NA	NA	NA	NA	NA
PRJEB6180	ERS469513	International Rice Research Institute	IRGC 13969	IRIS 313-10698	RADIN GOI		NA	NA	Malaysia	2	1	0	3	1	0	0	NA	NA	NA	NA	NA	NA	NA	NA	NA	NA	NA
PRJEB6180	ERS469512	International Rice Research Institute	IRGC 13910	IRIS 313-10697	SIAM ER 16		NA	NA	Malaysia	2	1	0	3	1	0	0	NA	NA	NA	NA	NA	NA	NA	NA	NA	NA	NA
PRJEB6180	ERS469511	International Rice Research Institute	IRGC 13836	IRIS 313-10695	TOLIL 14		NA	NA	Malaysia	2	1	0	3	1	0	0	NA	NA	NA	NA	NA	NA	NA	NA	NA	NA	NA
PRJEB6180	ERS469510	International Rice Research Institute	IRGC 13827	IRIS 313-10694	HAJI HARUN 38		NA	NA	Malaysia	2	1	0	3	1	0	0	NA	NA	NA	NA	NA	NA	NA	NA	NA	NA	NA
PRJEB6180	ERS469505	International Rice Research Institute	IRGC 13451	IRIS 313-10688	PADI TIMBUN		NA	NA	Malaysia	2	1	0	3	1	0	0	NA	NA	NA	NA	NA	NA	NA	NA	NA	NA	NA
PRJEB6180	ERS469504	International Rice Research Institute	IRGC 13444	IRIS 313-10687	PADI PULUT		NA	NA	Malaysia	2	1	0	3	1	0	0	NA	NA	NA	NA	NA	NA	NA	NA	NA	NA	NA
PRJEB6180	ERS469503	International Rice Research Institute	IRGC 13094	IRIS 313-10684	BONGOLON		NA	NA	Malaysia	2	1	0	3	1	0	0	NA	NA	NA	NA	NA	NA	NA	NA	NA	NA	NA
PRJEB6180	ERS469496	International Rice Research Institute	IRGC 12781	IRIS 313-10678	MAKALIOKA		NA	NA	Madagascar	2	1	0	3	1	0	0	NA	NA	NA	NA	NA	NA	NA	NA	NA	NA	NA
PRJEB6180	ERS469434	International Rice Research Institute	IRGC 7928	IRIS 313-10576	BAANYALOJOPOIHUN		NA	NA	Sierra Leone	2	1	0	3	1	0	0	NA	NA	NA	NA	NA	NA	NA	NA	NA	NA	NA
PRJEB6180	ERS469432	International Rice Research Institute	IRGC 7859	IRIS 313-10574	KAILUNDO		NA	NA	Sierra Leone	2	1	0	3	1	0	0	NA	NA	NA	NA	NA	NA	NA	NA	NA	NA	NA
PRJEB6180	ERS469431	International Rice Research Institute	IRGC 7850	IRIS 313-10573	SOSSOKA OULE		NA	NA	Mali	2	1	0	3	1	0	0	NA	NA	NA	NA	NA	NA	NA	NA	NA	NA	NA
PRJEB6180	ERS469430	International Rice Research Institute	IRGC 7842	IRIS 313-10572	KOTHMALLI KARUPPAN		NA	NA	Nigeria	2	1	0	3	1	0	0	NA	NA	NA	NA	NA	NA	NA	NA	NA	NA	NA
PRJEB6180	ERS469424	International Rice Research Institute	IRGC 7600	IRIS 313-10566	221 C-391-1-3-3		NA	NA	Indonesia	2	1	0	3	1	0	0	NA	NA	NA	NA	NA	NA	NA	NA	NA	NA	NA
PRJEB6180	ERS469423	International Rice Research Institute	IRGC 7585	IRIS 313-10565	221 B-36-1-1-1-1		NA	NA	Indonesia	2	1	0	3	1	0	0	NA	NA	NA	NA	NA	NA	NA	NA	NA	NA	NA
PRJEB6180	ERS469409	International Rice Research Institute	IRGC 6865	IRIS 313-10550	221 BC4-1-45-10		NA	NA	Indonesia	2	1	0	3	1	0	0	NA	NA	NA	NA	NA	NA	NA	NA	NA	NA	NA
PRJEB6180	ERS469401	International Rice Research Institute	IRGC 6636	IRIS 313-10541	IACA ESCURO		NA	NA	Guinea-Bissau	3	1	0	3	1	0	0	NA	NA	NA	NA	NA	NA	NA	NA	NA	NA	NA
PRJEB6180	ERS469397	International Rice Research Institute	IRGC 6479	IRIS 313-10536	GAMTI 1-34		NA	NA	Tanzania	2	1	0	3	1	0	0	NA	NA	NA	NA	NA	NA	NA	NA	NA	NA	NA
PRJEB6180	ERS469384	International Rice Research Institute	IRGC 5132	IRIS 313-10509	AMBARIKORI		NA	NA	Africa	2	1	0	3	1	0	0	NA	NA	NA	NA	NA	NA	NA	NA	NA	NA	NA
PRJEB6180	ERS469360	International Rice Research Institute	IRGC 14	IRIS 313-10428	SERAUP 50		NA	NA	Malaysia	2	1	0	3	1	0	0	NA	NA	NA	NA	NA	NA	NA	NA	NA	NA	NA
PRJEB6180	ERS467831	International Rice Research Institute	IRGC 117361	IRIS 313-10421	WAR 72-2-1-1		NA	NA	Sierra Leone	2	1	0	3	1	0	0	NA	NA	NA	NA	NA	NA	NA	NA	NA	NA	NA
PRJEB6180	ERS467919	International Rice Research Institute	IRGC 117314	IRIS 313-10337	B 6149 F-MR-7		NA	NA	Indonesia	2	1	0	3	1	0	0	NA	NA	NA	NA	NA	NA	NA	NA	NA	NA	NA
PRJEB6180	ERS467918	International Rice Research Institute	IRGC 117311	IRIS 313-10334	B 6136 E-3-TB-0-1-5		NA	NA	Indonesia	2	1	0	3	1	0	0	NA	NA	NA	NA	NA	NA	NA	NA	NA	NA	NA
PRJEB6180	ERS467917	International Rice Research Institute	IRGC 117312	IRIS 313-10333	B 6136-3-TB-0-1-5		NA	NA	Indonesia	2	1	0	3	1	0	0	NA	NA	NA	NA	NA	NA	NA	NA	NA	NA	NA
PRJEB6180	ERS468302	International Rice Research Institute	IRGC 117310	IRIS 313-10332	B 4414 F-MR-6-3		NA	NA	Indonesia	2	1	0	3	1	0	0	NA	NA	NA	NA	NA	NA	NA	NA	NA	NA	NA
PRJEB6180	ERS468155	International Rice Research Institute	IRGC 81675	IRIS 313-10113	EX FOILAEIN(NAPUTO)		NA	NA	Mozambique	2	1	0	3	1	0	0	NA	NA	NA	NA	NA	NA	NA	NA	NA	NA	NA
PRJEB6180	ERS468229	International Rice Research Institute	IRGC 79912	IRIS 313-10109	EX EBOKOZURU		NA	NA	Nigeria	2	1	0	3	1	0	0	NA	NA	NA	NA	NA	NA	NA	NA	NA	NA	NA
PRJEB6180	ERS467873	International Rice Research Institute	IRGC 78426	IRIS 313-10102	KELIRENY		NA	NA	Madagascar	2	1	0	3	1	0	0	NA	NA	NA	NA	NA	NA	NA	NA	NA	NA	NA
PRJEB6180	ERS468453	International Rice Research Institute	IRGC 77876	IRIS 313-10099	MANONGAZATO		NA	NA	Madagascar	3	1	0	3	1	0	0	NA	NA	NA	NA	NA	NA	NA	NA	NA	NA	NA
PRJEB6180	ERS468152	International Rice Research Institute	IRGC 69884	IRIS 313-10050	TSIMATAHOPAOSA		NA	NA	Madagascar	2	1	0	3	1	0	0	NA	NA	NA	NA	NA	NA	NA	NA	NA	NA	NA
PRJEB6180	ERS468150	International Rice Research Institute	IRGC 69582	IRIS 313-10047	EX MARABA-GURUKU		NA	NA	Nigeria	2	1	0	3	1	0	0	NA	NA	NA	NA	NA	NA	NA	NA	NA	NA	NA
PRJEB6180	ERS468149	International Rice Research Institute	IRGC 69487	IRIS 313-10046	CHAMA(DWARF)		NA	NA	Zambia	2	1	0	3	1	0	0	NA	NA	NA	NA	NA	NA	NA	NA	NA	NA	NA
PRJEB6180	ERS468148	International Rice Research Institute	IRGC 69474	IRIS 313-10045	BANTA TIMA		NA	NA	Gambia	2	1	0	3	1	0	0	NA	NA	NA	NA	NA	NA	NA	NA	NA	NA	NA
PRJEB6180	ERS467829	International Rice Research Institute	IRGC 69349	IRIS 313-10041	BOTOHAVANA MENA		NA	NA	Madagascar	3	1	0	3	1	0	0	NA	NA	NA	NA	NA	NA	NA	NA	NA	NA	NA
PRJEB6180	ERS468147	International Rice Research Institute	IRGC 69015	IRIS 313-10035	RIZ TYPE SORGHO		NA	NA	Madagascar	2	1	0	3	1	0	0	NA	NA	NA	NA	NA	NA	NA	NA	NA	NA	NA
PRJEB6180	ERS468146	International Rice Research Institute	IRGC 69014	IRIS 313-10034	RIZ INDETERMINE		NA	NA	Niger	2	1	0	3	1	0	0	NA	NA	NA	NA	NA	NA	NA	NA	NA	NA	NA
PRJEB6180	ERS468145	International Rice Research Institute	IRGC 68951	IRIS 313-10032	NS1576		NA	NA	Madagascar	3	0.995	0.005	0	0.966	0.00966667	0.024	NA	NA	NA	NA	NA	NA	NA	NA	NA	NA	NA
PRJEB6180	ERS467872	International Rice Research Institute	IRGC 68878	IRIS 313-10030	NS252		NA	NA	Madagascar	2	1	0	3	1	0	0	NA	NA	NA	NA	NA	NA	NA	NA	NA	NA	NA
PRJEB6180	ERS468144	International Rice Research Institute	IRGC 68517	IRIS 313-10026	KITRANA 1007		NA	NA	Madagascar	2	1	0	3	1	0	0	NA	NA	NA	NA	NA	NA	NA	NA	NA	NA	NA
PRJEB6180	ERS468412	International Rice Research Institute	IRGC 68500	IRIS 313-10025	KALAPATLE		NA	NA	Madagascar	3	1	0	3	0.976	0.00966667	0.014	NA	NA	NA	NA	NA	NA	NA	NA	NA	NA	NA
PRJNA550398	SAMN12126865	International Rice Research Institute	IRIS 251-120448	INPARI26	Inpari 26		NA	NA	Indonesia	2	1	0	3	0.995	0.001	0.004	NA	NA	NA	NA	NA	NA	NA	NA	NA	NA	NA
PRJNA550398	SAMN12126864	United States Department of Agriculture	GSOR 301334	Habiganjboro6	Habiganj boro 6		NA	NA	Bangladesh	3	0.994	0.006	0	0.969	0.008	0.023	NA	NA	NA	NA	212	320	306	374	150	163	232
PRJDB4702	SAMD00049853	National Institute of Genetics (Japan)	W1702	DRR057990	NA		NA	NA	Mali	2	1	0	3	0.975	0.012	0.013	NA	NA	NA	NA	NA	NA	NA	NA	NA	NA	NA
PRJDB4702	SAMD00049852	National Institute of Genetics (Japan)	W1646	DRR057989	NA		NA	NA	Tanzania	1	0.998667	0.00133333	0	0.0986667	0.839	0.063	NA	NA	NA	NA	NA	NA	NA	NA	NA	NA	NA
PRJDB4702	SAMD00049851	National Institute of Genetics (Japan)	W1643	DRR057988	NA		NA	NA	Botswana	1	1	0	2	0.101333	0.841	0.058	NA	NA	NA	NA	NA	NA	NA	NA	NA	NA	NA
PRJDB4702	SAMD00049850	National Institute of Genetics (Japan)	W1642	DRR057987	NA		NA	NA	Botswana	1	0.999	0.001	0	0.108	0.839333	0.052	NA	NA	NA	NA	NA	NA	NA	NA	NA	NA	NA
PRJDB4702	SAMD00049849	National Institute of Genetics (Japan)	W1605	DRR057986	NA		NA	NA	Nigeria	1	1	0	2	0.01	0.984	0.006	NA	NA	NA	NA	NA	NA	NA	NA	NA	NA	NA
PRJDB4702	SAMD00049848	National Institute of Genetics (Japan)	W1588	DRR057985	NA		NA	NA	Cameroon	1	1	0	2	0.057	0.907	0.036	NA	NA	NA	NA	NA	NA	NA	NA	NA	NA	NA
PRJDB4702	SAMD00049847	National Institute of Genetics (Japan)	W1583	DRR057984	NA		NA	NA	Cameroon	1	1	0	2	0.0706667	0.893	0.036	NA	NA	NA	NA	NA	NA	NA	NA	NA	NA	NA
PRJDB4702	SAMD00049846	National Institute of Genetics (Japan)	W1574	DRR057983	NA		NA	NA	Nigeria	1	1	0	2	0.042	0.935	0.024	NA	NA	NA	NA	NA	NA	NA	NA	NA	NA	NA
PRJDB4702	SAMD00049845	National Institute of Genetics (Japan)	W1473	DRR057982	NA		NA	NA	Chad	1	0.999	0.001	0	0.057	0.912	0.031	NA	NA	NA	NA	NA	NA	NA	NA	NA	NA	NA
PRJDB4702	SAMD00049844	National Institute of Genetics (Japan)	W1467	DRR057981	NA		NA	NA	Cameroon	1	1	0	2	0.068	0.896	0.036	NA	NA	NA	NA	NA	NA	NA	NA	NA	NA	NA
PRJDB4702	SAMD00049843	National Institute of Genetics (Japan)	W1443(A)	DRR057980	NA		NA	NA	Mali	1	0.997	0.003	0	0.007	0.984	0.009	NA	NA	NA	NA	NA	NA	NA	NA	NA	NA	NA
PRJDB4702	SAMD00049842	National Institute of Genetics (Japan)	W1416	DRR057979	NA		NA	NA	Sierra Leone	1	0.998	0.002	0	0.085	0.879	0.035	NA	NA	NA	NA	NA	NA	NA	NA	NA	NA	NA
PRJDB4702	SAMD00049841	National Institute of Genetics (Japan)	W1410	DRR057978	NA		NA	NA	Sierra Leone	1	0.999	0.001	0	0.044	0.927	0.029	NA	NA	NA	NA	NA	NA	NA	NA	NA	NA	NA
PRJDB4702	SAMD00049840	National Institute of Genetics (Japan)	W1063	DRR057977	NA		NA	NA	NA	1	1	0	2	0.004	0.991	0.005	NA	NA	NA	NA	NA	NA	NA	NA	NA	NA	NA
PRJDB4702	SAMD00049839	National Institute of Genetics (Japan)	W1050	DRR057976	NA		NA	NA	Gambia	1	0.999	0.001	0	0.017	0.972	0.011	NA	NA	NA	NA	NA	NA	NA	NA	NA	NA	NA
PRJDB4702	SAMD00049838	National Institute of Genetics (Japan)	W0747	DRR057975	NA		NA	NA	Mali	1	0.998	0.002	0	0.074	0.879	0.047	NA	NA	NA	NA	NA	NA	NA	NA	NA	NA	NA
PRJDB4702	SAMD00049837	National Institute of Genetics (Japan)	W0720	DRR057974	NA		NA	NA	Mali	1	1	0	2	0	1	0	NA	NA	NA	NA	NA	NA	NA	NA	NA	NA	NA
PRJDB4702	SAMD00049836	National Institute of Genetics (Japan)	W0698	DRR057973	NA		NA	NA	Guinea	1	1	0	2	0.039	0.946	0.015	NA	NA	NA	NA	NA	NA	NA	NA	NA	NA	NA
PRJDB4702	SAMD00049835	National Institute of Genetics (Japan)	W0652	DRR057972	NA		NA	NA	Sierra Leone	1	1	0	2	0.055	0.91	0.035	NA	NA	NA	NA	NA	NA	NA	NA	NA	NA	NA
PRJDB4702	SAMD00049834	National Institute of Genetics (Japan)	W0049	DRR057971	NA		NA	NA	NA	1	0.999	0.001	0	0.006	0.988	0.006	NA	NA	NA	NA	NA	NA	NA	NA	NA	NA	NA
PRJDB4702	SAMD00049833	National Institute of Genetics (Japan)	W0042	DRR057970	NA		NA	NA	NA	1	1	0	2	0.07	0.885	0.045	NA	NA	NA	NA	NA	NA	NA	NA	NA	NA	NA
PRJNA550398	SAMN12126863	Fengyi Hu, Yunnan University	NA	Bt138	Minghui 63		NA	NA	China	2	1	0	3	0.993	0.001	0.006	NA	NA	NA	NA	212	NA	306	374	149	163	227
PRJNA550398	SAMN12126862	Fengyi Hu, Yunnan University	NA	Bt137	34-31 (PR5)		NA	NA	NA	6	0.488	0.512	0	0.485	0.001	0.514	NA	NA	NA	NA	212	NA	306	374	149	163	232
PRJNA550398	SAMN12126861	Fengyi Hu, Yunnan University	NA	Bt136	22-93 (PR4)		NA	NA	NA	6	0.458	0.542	0	0.457	0.001	0.542	NA	NA	NA	NA	212	NA	306	374	149	163	232
PRJNA550398	SAMN12126860	Fengyi Hu, Yunnan University	NA	Bt135	RD23 x O. longistaminata		NA	NA	Thailand	6	0.467	0.533	0	0.466	0.001	0.533	NA	NA	NA	NA	212	NA	306	374	149	163	232
PRJNA550398	SAMN12126859	Fengyi Hu, Yunnan University	NA	Bt134	RD23		NA	NA	NA	2	0.999	0.001	0	0.992	0.001	0.007	NA	NA	NA	NA	212	NA	307	374	149	163	232
PRJNA550398	SAMN12126858	Fengyi Hu, Yunnan University	NA	Bt133	Oryza longistaminata		NA	NA	Mali	6	0.014	0.986	0	0.016	0.001	0.983	3	0.145333	0.832667	0.021	216	321	307	374	143	164	241
PRJNA550398	SAMN12126857	United States Department of Agriculture	PI 574674	BR18	BR18	Shahjalal	NA	NA	Bangladesh	2	0.996	0.004	0	0.992	0	0.008	NA	NA	NA	NA	212	320	306	374	149	164	227
PRJNA550398	SAMN12126855	United States Department of Agriculture	PI 590399	590399	AC101254		NA	NA	NA	2	1	0	3	0.995	0	0.004	NA	NA	NA	NA	NA	NA	NA	NA	NA	NA	NA
PRJNA550398	SAMN12126854	United States Department of Agriculture	PI 450528	450528	UG 46	Tog 7275	8.7	14.183	Cameroon	1	1	0	2	0.0523333	0.941	0.007	NA	NA	NA	NA	NA	NA	NA	NA	NA	NA	NA
PRJNA550398	SAMN12126853	United States Department of Agriculture	PI 450514	450514	Gourmouloung	Tog 7259	9.083	16.333	Chad	2	1	0	3	1	0	0	NA	NA	NA	NA	NA	NA	NA	NA	NA	NA	NA
PRJNA550398	SAMN12126852	United States Department of Agriculture	PI 450400	450400	CG 27	Tog 7139	12.866	-14.933	Senegal	1	1	0	2	0.066	0.93	0.004	NA	NA	NA	NA	NA	NA	NA	NA	NA	NA	NA
PRJNA550398	SAMN12126851	United States Department of Agriculture	PI 450367	450367	LG 10	TOg 7104	13.983	-5.6	Mali	1	1	0	2	0.058	0.935	0.007	NA	NA	NA	NA	NA	NA	NA	NA	NA	NA	NA
PRJNA550398	SAMN12126850	United States Department of Agriculture	PI 369453	369453	Asankare		6.766	-1.516	Ghana	3	1	0	3	1	0	0	NA	NA	NA	NA	NA	NA	NA	NA	NA	NA	NA
PRJNA550398	SAMN12126849	United States Department of Agriculture	PI 369447	369447	Kwadwo Amoa		6.683	-1.616	Ghana	3	1	0	3	1	0	0	NA	NA	NA	NA	NA	NA	NA	NA	NA	NA	NA
PRJNA550398	SAMN12126848	United States Department of Agriculture	GSOR 311694	311694	HG 24		10.666	-5.166	Burkina Faso	1	0.993	0.007	0	0.053	0.935	0.012	NA	NA	NA	NA	NA	NA	NA	NA	NA	NA	NA
PRJNA550398	SAMN12126847	United States Department of Agriculture	GSOR 311689	311689	LG 9	Tog 7102	14.333	-6	Mali	1	1	0	2	0.062	0.931	0.007	NA	NA	NA	NA	NA	NA	NA	NA	NA	NA	NA
PRJNA550398	SAMN12126846	United States Department of Agriculture	PI 236393	236393	NA		NA	NA	Guinea	1	0.999	0.001	0	0.065	0.921	0.013	NA	NA	NA	NA	NA	NA	NA	NA	NA	NA	NA
PRJNA550398	SAMN12126845	International Rice Research Institute	IRGC 117263	117263	NA		-17.6581	15.4658	Namibia	4	0.001	0.999	0	0.009	0.003	0.988	1	0.419	0.243	0.338	216	321	306	374	143	164	241
PRJNA550398	SAMN12126844	International Rice Research Institute	IRGC 117263	117263	NA		-17.6581	15.4658	Namibia	5	0.018	0.982	0	0.035	0.011	0.953	2	0.075	0.08	0.845	216	321	306	374	143	164	241
PRJNA550398	SAMN12126843	International Rice Research Institute	IRGC 117261	117261	NA		-18.0033	16.1594	Namibia	4	0.001	0.999	0	0.007	0.002	0.99	1	0.581667	0.166667	0.251667	216	321	306	374	143	164	241
PRJNA550398	SAMN12126842	International Rice Research Institute	IRGC 117261	117261	NA		-18.0033	16.1594	Namibia	4	0.003	0.997	0	0.014	0.004	0.982	1	0.634	0.000666667	0.365	216	321	306	374	143	164	241
PRJNA550398	SAMN12126841	International Rice Research Institute	IRGC 115138	115138	NA		-16.2039	39.915	Mozambique	4	0.002	0.998	0	0.017	0.005	0.978	2	0.268	0.193	0.539	216	321	306	374	144	164	232
PRJNA550398	SAMN12126840	International Rice Research Institute	IRGC 115138	115138	NA		-16.2039	39.915	Mozambique	4	0.01	0.99	0	0.025	0.009	0.966	2	0.361	0	0.638667	216	321	306	375	144	164	241
PRJNA550398	SAMN12126839	International Rice Research Institute	IRGC 115136	115136	NA		-15.2097	23.6856	Zambia	4	0.002	0.998	0	0.012	0.004	0.983	2	0.188	0.427667	0.384667	216	321	306	374	144	164	241
PRJNA550398	SAMN12126838	International Rice Research Institute	IRGC 115136	115136	NA		-15.2097	23.6856	Zambia	4	0	1	1	0	0	1	1	0.440333	0.383	0.176667	216	321	307	374	143	164	241
PRJNA550398	SAMN12126837	International Rice Research Institute	IRGC 113664	113664	NA		-6.36806	34.885	Tanzania	4	0.002	0.998	0	0.009	0.003	0.987	1	0.791	0.002	0.207	216	321	307	374	142	163	NA
PRJNA550398	SAMN12126836	International Rice Research Institute	IRGC 113664	113664	NA		-6.36806	34.885	Tanzania	4	0.005	0.995	0	0.012	0.003	0.984	1	0.769667	0.000333333	0.229667	216	321	307	374	143	163	241
PRJNA550398	SAMN12126835	International Rice Research Institute	IRGC 113663	113663	NA		-6.36806	34.885	Tanzania	4	0	1	1	0	0	1	1	0.550333	0.361	0.0886667	216	321	307	374	143	164	241
PRJNA550398	SAMN12126834	International Rice Research Institute	IRGC 113663	113663	NA		-6.36806	34.885	Tanzania	4	0	1	1	0	0	1	1	0.503333	0.396333	0.100667	216	321	307	374	143	164	241
PRJNA550398	SAMN12126833	International Rice Research Institute	IRGC 113659	113659	NA		-18.7772	46.8311	Madagascar	4	0	1	1	0	0	1	1	0.675333	0.16	0.164667	216	321	306	374	143	163	241
PRJNA550398	SAMN12126832	International Rice Research Institute	IRGC 113659	113659	NA		-18.7772	46.8311	Madagascar	4	0	1	1	0	0	1	1	0.858	0.116	0.0256667	216	321	307	374	143	163	241
PRJNA550398	SAMN12126831	International Rice Research Institute	IRGC 110404	110404	NA		21.1278	82.8006	India (Mali)	6	0.434	0.566	0	0.421	0.0166667	0.563	NA	NA	NA	NA	216	321	307	373	143	164	241
PRJNA550398	SAMN12126830	International Rice Research Institute	IRGC 110404	110404	NA		21.1278	82.8006	India (Mali)	6	0	1	1	0	0	1	3	0.202	0.783333	0.0143333	216	321	307	373	143	164	NA
PRJNA550398	SAMN12126829	International Rice Research Institute	IRGC 106456	106456	NA		14.8167	-3.96667	Mali	6	0.329	0.671	0	0.323333	0.012	0.665	NA	NA	NA	NA	216	321	307	375	143	164	241
PRJNA550398	SAMN12126828	International Rice Research Institute	IRGC 106456	106456	NA		14.8167	-3.96667	Mali	6	0	1	1	0	0	1	3	0	1	0	216	321	307	375	143	164	241
PRJNA550398	SAMN12126827	International Rice Research Institute	IRGC 106455	106455	NA		14.7167	-4.1	Mali	6	0	1	1	0	0	1	3	0	1	0	NA	320	306	375	143	164	241
PRJNA550398	SAMN12126826	International Rice Research Institute	IRGC 106455	106455	NA		14.7167	-4.1	Mali	6	0	1	1	0	0	1	3	0	1	0	216	321	307	374	143	164	241
PRJNA550398	SAMN12126825	International Rice Research Institute	IRGC 105563	105563	NA		-6.36806	34.885	Tanzania	4	0	1	1	0	0	1	1	0.894667	0.105333	0	216	321	306	375	143	164	241
PRJNA550398	SAMN12126824	International Rice Research Institute	IRGC 105563	105563	NA		-6.36806	34.885	Tanzania	4	0	1	1	0	0	1	1	0.921667	0.0783333	0	216	321	306	375	143	164	241
PRJNA550398	SAMN12126823	International Rice Research Institute	IRGC 105262	105262	NA		-0.19	34.8697	Kenya	4	0	1	1	0	0	1	1	0.692667	0.122	0.186	216	NA	NA	384	143	164	241
PRJNA550398	SAMN12126822	International Rice Research Institute	IRGC 105262	105262	NA		-0.19	34.8697	Kenya	4	0	1	1	0	0	1	1	0.57	0.414667	0.015	216	321	307	375	143	164	241
PRJNA550398	SAMN12126821	International Rice Research Institute	IRGC 105260	105260	NA		-4.53306	39.1667	Kenya	4	0	1	1	0	0	1	1	0.938	0.062	0	216	321	306	375	143	163	241
PRJNA550398	SAMN12126820	International Rice Research Institute	IRGC 105260	105260	NA		-4.53306	39.1667	Kenya	4	0.009	0.991	0	0.02	0.007	0.973	2	0.503333	0	0.496667	216	321	307	374	143	163	241
PRJNA550398	SAMN12126819	International Rice Research Institute	IRGC 105206	105206	NA		8.25	34.25	Ethiopia	4	0	1	1	0	0	1	1	0.842	0.149	0.00933333	216	320	307	375	143	164	241
PRJNA550398	SAMN12126818	International Rice Research Institute	IRGC 105206	105206	NA		8.25	34.25	Ethiopia	4	0	1	1	0	0	1	1	0.871333	0.128	0.001	216	320	306	375	143	164	241
PRJNA550398	SAMN12126817	International Rice Research Institute	IRGC 105205	105205	NA		11.95	37.6333	Ethiopia	4	0	1	1	0.002	0	0.998	1	0.946	0.001	0.053	216	321	306	374	143	164	241
PRJNA550398	SAMN12126816	International Rice Research Institute	IRGC 105205	105205	NA		11.95	37.6333	Ethiopia	4	0	1	1	0	0	1	1	0.916	0	0.084	216	321	306	374	143	164	241
PRJNA550398	SAMN12126814	International Rice Research Institute	IRGC 105204	105204	NA		11.95	37.6333	Ethiopia	4	0	1	1	0	0	1	1	0.626667	0.266	0.107667	216	321	307	375	143	164	241
PRJNA550398	SAMN12126813	International Rice Research Institute	IRGC 105203	105203	NA		11.95	37.6333	Ethiopia	4	0	1	1	0	0	1	1	0.947	0	0.053	216	321	307	374	143	164	241
PRJNA550398	SAMN12126812	International Rice Research Institute	IRGC 105203	105203	NA		11.95	37.6333	Ethiopia	4	0	1	1	0	0	1	1	0.838	0	0.162	216	321	306	374	143	164	241
PRJNA550398	SAMN12126811	International Rice Research Institute	IRGC 105202	105202	NA		11.8833	37.65	Ethiopia	4	0	1	1	0	0	1	1	0.59	0.366	0.044	216	321	307	375	143	164	241
PRJNA550398	SAMN12126810	International Rice Research Institute	IRGC 105202	105202	NA		11.8833	37.65	Ethiopia	4	0	1	1	0	0	1	1	0.927	0	0.073	216	321	306	374	143	164	241
PRJNA550398	SAMN12126809	International Rice Research Institute	IRGC 105201	105201	NA		11.8833	37.65	Ethiopia	4	0	1	1	0	0	1	1	0.897667	0	0.102	216	321	306	374	143	164	241
PRJNA550398	SAMN12126808	International Rice Research Institute	IRGC 105201	105201	NA		11.8833	37.65	Ethiopia	4	0	1	1	0	0	1	1	0.92	0	0.08	216	321	306	374	143	164	241
PRJNA550398	SAMN12126807	International Rice Research Institute	IRGC 105200	105200	NA		11.95	37.6333	Ethiopia	4	0	1	1	0	0	1	1	0.722	0.171	0.107	216	321	306	374	143	164	241
PRJNA550398	SAMN12126806	International Rice Research Institute	IRGC 105200	105200	NA		11.95	37.6333	Ethiopia	4	0.001	0.999	0	0.006	0.003	0.991	1	0.532667	0.170667	0.296333	216	321	306	374	143	164	241
PRJNA550398	SAMN12126805	International Rice Research Institute	IRGC 105199	105199	NA		11.95	37.6333	Ethiopia	4	0	1	1	0	0	1	1	0.794667	0.146667	0.0583333	216	321	307	374	143	164	NA
PRJNA550398	SAMN12126804	International Rice Research Institute	IRGC 105199	105199	NA		11.95	37.6333	Ethiopia	4	0	1	1	0	0	1	1	0.724333	0.245	0.0306667	216	321	307	374	143	164	241
PRJNA550398	SAMN12126803	International Rice Research Institute	IRGC 105198	105198	NA		11.95	37.6333	Ethiopia	4	0	1	1	0	0	1	1	0.652333	0.347667	0	216	321	307	374	143	164	241
PRJNA550398	SAMN12126802	International Rice Research Institute	IRGC 105198	105198	NA		11.95	37.6333	Ethiopia	4	0	1	1	0	0	1	1	0.561667	0.438333	0	216	321	306	374	143	164	241
PRJNA550398	SAMN12126801	International Rice Research Institute	IRGC 105183	105183	NA		10.8	-1.33333	Ghana	6	0.077	0.923	0	0.08	0.003	0.917	NA	NA	NA	NA	216	321	307	375	143	164	241
PRJNA550398	SAMN12126800	International Rice Research Institute	IRGC 105183	105183	NA		10.8	-1.33333	Ghana	6	0	1	1	0	0	1	3	0.175333	0.660333	0.164333	216	321	307	375	143	164	241
PRJNA550398	SAMN12126799	International Rice Research Institute	IRGC 105078	105078	NA		7.36528	12.3433	Cameroon	6	0	1	1	0	0	1	3	0.410333	0.589667	0	216	321	307	374	143	163	241
PRJNA550398	SAMN12126798	International Rice Research Institute	IRGC 105078	105078	NA		7.36528	12.3433	Cameroon	6	0	1	1	0	0	1	1	0.533	0.467	0	216	321	307	374	143	163	241
PRJNA550398	SAMN12126797	International Rice Research Institute	IRGC 105077	105077	NA		13.15	5.33333	Nigeria	4	0	1	1	0	0	1	1	0.859333	0.0923333	0.048	216	321	307	375	143	164	241
PRJNA550398	SAMN12126796	International Rice Research Institute	IRGC 105077	105077	NA		13.15	5.33333	Nigeria	4	0	1	1	0	0	1	1	0.659333	0.243667	0.097	216	321	307	375	143	164	241
PRJNA550398	SAMN12126795	International Rice Research Institute	IRGC 105076	105076	NA		12.8	4.4	Nigeria	4	0	1	1	0	0	1	1	0.645333	0.344333	0.0103333	216	321	307	375	143	164	241
PRJNA550398	SAMN12126794	International Rice Research Institute	IRGC 105076	105076	NA		12.8	4.4	Nigeria	4	0	1	1	0	0	1	1	0.554333	0.445667	0	NA	321	307	375	143	164	241
PRJNA550398	SAMN12126793	International Rice Research Institute	IRGC 105075	105075	NA		12.7667	4.41667	Nigeria	6	0.449	0.551	0	0.444	0.003	0.554	NA	NA	NA	NA	216	321	307	374	143	164	241
PRJNA550398	SAMN12126792	International Rice Research Institute	IRGC 105075	105075	NA		12.7667	4.41667	Nigeria	6	0	1	1	0	0	1	3	0.198667	0.801333	0	216	321	306	375	143	164	241
PRJNA550398	SAMN12126791	International Rice Research Institute	IRGC 105073	105073	NA		12.4667	8.51667	Nigeria	6	0	1	1	0	0	1	3	0.354667	0.645	0	216	321	307	374	143	163	241
PRJNA550398	SAMN12126790	International Rice Research Institute	IRGC 105073	105073	NA		12.4667	8.51667	Nigeria	6	0	1	1	0	0	1	3	0.364	0.636	0	216	321	307	374	143	163	241
PRJNA550398	SAMN12126789	International Rice Research Institute	IRGC 105067	105067	NA		9.75	-5.16667	Côte D'Ivoire	4	0	1	1	0	0	1	1	0.541333	0.394667	0.064	216	321	307	375	143	164	241
PRJNA550398	SAMN12126788	International Rice Research Institute	IRGC 105067	105067	NA		9.75	-5.16667	Côte D'Ivoire	6	0	1	1	0	0	1	1	0.449667	0.533667	0.0166667	216	321	307	375	143	164	241
PRJNA550398	SAMN12126787	International Rice Research Institute	IRGC 105065	105065	NA		13.5	-5.75	Mali	6	0	1	1	0	0	1	3	0.168667	0.806333	0.0256667	216	321	307	375	143	164	241
PRJNA550398	SAMN12126786	International Rice Research Institute	IRGC 105065	105065	NA		13.5	-5.75	Mali	6	0	1	1	0	0	1	3	0.227	0.759667	0.0136667	216	321	307	375	143	164	241
PRJNA550398	SAMN12126785	International Rice Research Institute	IRGC 105061	105061	NA		9.04972	6.14972	Nigeria	6	0	1	1	0	0	1	1	0.488	0.511667	0	216	321	307	374	143	163	241
PRJNA550398	SAMN12126784	International Rice Research Institute	IRGC 105061	105061	NA		9.04972	6.14972	Nigeria	6	0	1	1	0	0	1	1	0.442333	0.557333	0	216	321	307	374	143	163	241
PRJNA550398	SAMN12126783	International Rice Research Institute	IRGC 105060	105060	NA		7.74972	-0.983333	Ghana	4	0.004	0.996	0	0.006	0.000333333	0.994	1	0.601	0.360333	0.0383333	216	321	NA	375	143	164	241
PRJNA550398	SAMN12126782	International Rice Research Institute	IRGC 105060	105060	NA		7.74972	-0.983333	Ghana	4	0	1	1	0	0	1	1	0.733667	0.214	0.052	216	321	307	375	143	164	241
PRJNA550398	SAMN12126781	International Rice Research Institute	IRGC 105058	105058	NA		9.01111	-12.9519	Sierra Leone	4	0	1	1	0	0	1	1	0.462667	0.443333	0.094	216	321	307	374	143	164	241
PRJNA550398	SAMN12126780	International Rice Research Institute	IRGC 105058	105058	NA		9.01111	-12.9519	Sierra Leone	4	0	1	1	0	0	1	1	0.561	0.368667	0.071	216	321	307	375	143	164	241
PRJNA550398	SAMN12126779	International Rice Research Institute	IRGC 105057	105057	NA		8.485	-13.2372	Sierra Leone	4	0.001	0.999	0	0.006	0.00133333	0.993	1	0.378333	0.416667	0.205	216	321	307	375	143	164	241
PRJNA550398	SAMN12126778	International Rice Research Institute	IRGC 105057	105057	NA		8.485	-13.2372	Sierra Leone	4	0.001	0.999	0	0.007	0.002	0.991	1	0.422333	0.342	0.235	216	321	307	375	143	163	241
PRJNA550398	SAMN12126777	International Rice Research Institute	IRGC 105056	105056	NA		13.4833	-15.5664	Gambia	4	0	1	1	0	0	1	1	0.346333	0.329333	0.324333	216	321	307	374	143	164	241
PRJNA550398	SAMN12126776	International Rice Research Institute	IRGC 105056	105056	NA		13.4833	-15.5664	Gambia	6	0	1	1	0	0	1	3	0.233667	0.747333	0.019	216	321	307	374	143	164	241
PRJNA550398	SAMN12126775	International Rice Research Institute	IRGC 104977	104977	NA		-4.53306	39.1667	Kenya	4	0	1	1	0	0	1	1	1	0	0	216	321	306	374	143	163	241
PRJNA550398	SAMN12126774	International Rice Research Institute	IRGC 104977	104977	NA		-4.53306	39.1667	Kenya	4	0	1	1	0	0	1	1	1	0	0	216	321	306	374	143	163	241
PRJNA550398	SAMN12126773	International Rice Research Institute	IRGC 104976	104976	NA		-4.53306	39.1667	Kenya	4	0	1	1	0	0	1	1	0.784667	0.17	0.0453333	216	321	306	374	143	164	241
PRJNA550398	SAMN12126772	International Rice Research Institute	IRGC 104976	104976	NA		-4.53306	39.1667	Kenya	6	0	1	1	0	0	1	1	0.49	0.51	0	216	321	307	374	143	163	241
PRJNA550398	SAMN12126770	International Rice Research Institute	IRGC 104637	104637	NA		9.11083	40.4931	Ethiopia	4	0	1	1	0	0	1	1	0.921667	0.0746667	0.00333333	216	321	307	374	143	163	241
PRJNA550398	SAMN12126769	International Rice Research Institute	IRGC 104330	104330	NA		11.3333	14.5833	Cameroon	4	0	1	1	0	0	1	1	0.647333	0.352667	0	216	321	307	374	143	163	241
PRJNA550398	SAMN12126768	International Rice Research Institute	IRGC 104330	104330	NA		11.3333	14.5833	Cameroon	4	0	1	1	0	0	1	1	0.64	0.36	0	216	321	307	374	143	163	241
PRJNA550398	SAMN12126767	International Rice Research Institute	IRGC 104329	104329	NA		9.25	16.0833	Chad	4	0	1	1	0	0	1	1	0.821	0.173	0.00566667	216	321	307	374	143	163	241
PRJNA550398	SAMN12126766	International Rice Research Institute	IRGC 104329	104329	NA		9.25	16.0833	Chad	4	0	1	1	0	0	1	1	0.739	0.212	0.0486667	216	321	307	374	143	163	241
PRJNA550398	SAMN12126765	International Rice Research Institute	IRGC 104303	104303	NA		-12.8297	34.1333	Malawi	4	0	1	1	0	0	1	1	0.851	0.0306667	0.118667	216	321	307	374	143	163	241
PRJNA550398	SAMN12126764	International Rice Research Institute	IRGC 104303	104303	NA		-12.8297	34.1333	Malawi	4	0	1	1	0	0	1	1	0.770667	0.122667	0.106	216	321	306	374	143	163	241
PRJNA550398	SAMN12126763	International Rice Research Institute	IRGC 104302	104302	NA		-12.9167	34.2833	Malawi	6	0	1	1	0	0	1	1	0.490333	0.488	0.022	216	321	307	374	143	NA	241
PRJNA550398	SAMN12126762	International Rice Research Institute	IRGC 104302	104302	NA		-12.9167	34.2833	Malawi	6	0	1	1	0	0	1	1	0.419333	0.573333	0.00766667	216	321	306	374	143	164	241
PRJNA550398	SAMN12126761	International Rice Research Institute	IRGC 104301	104301	NA		-12.9167	34.2833	Malawi	4	0	1	1	0	0	1	1	0.775333	0.049	0.175333	216	321	307	374	143	164	232
PRJNA550398	SAMN12126760	International Rice Research Institute	IRGC 104301	104301	NA		-12.9167	34.2833	Malawi	4	0	1	1	0	0	1	1	0.846	0.081	0.0733333	216	NA	307	374	143	164	232
PRJNA550398	SAMN12126759	International Rice Research Institute	IRGC 104300	104300	NA		-12.9167	34.2833	Malawi	4	0.469	0.531	0	0.456	0.016	0.528	NA	NA	NA	NA	216	321	307	375	143	164	241
PRJNA550398	SAMN12126758	International Rice Research Institute	IRGC 104300	104300	NA		-12.9167	34.2833	Malawi	6	0.187	0.813	0	0.189	0.006	0.805	NA	NA	NA	NA	216	321	306	374	143	164	NA
PRJNA550398	SAMN12126757	International Rice Research Institute	IRGC 104298	104298	NA		-15.6167	27.6	Zambia	6	0	1	1	0	0	1	3	0.160667	0.625667	0.214	216	321	307	375	143	164	241
PRJNA550398	SAMN12126756	International Rice Research Institute	IRGC 104298	104298	NA		-15.6167	27.6	Zambia	4	0	1	1	0	0	1	1	0.334	0.296	0.37	216	321	307	374	143	164	241
PRJNA550398	SAMN12126755	International Rice Research Institute	IRGC 104153	104153	NA		11.3333	14.5833	Cameroon	4	0	1	1	0	0	1	1	0.841667	0.158333	0	216	321	307	374	143	163	241
PRJNA550398	SAMN12126754	International Rice Research Institute	IRGC 104153	104153	NA		11.3333	14.5833	Cameroon	4	0	1	1	0	0	1	1	0.917667	0.0823333	0	216	321	307	374	143	164	241
PRJNA550398	SAMN12126753	International Rice Research Institute	IRGC 104152	104152	NA		5.88333	10.5333	Cameroon	4	0	1	1	0	0	1	1	0.638	0.352333	0.009	216	321	307	374	143	163	241
PRJNA550398	SAMN12126752	International Rice Research Institute	IRGC 104152	104152	NA		5.88333	10.5333	Cameroon	4	0	1	1	0	0	1	1	0.664667	0.33	0.00533333	216	321	307	375	143	164	241
PRJNA550398	SAMN12126751	International Rice Research Institute	IRGC 104151	104151	NA		8.66667	14.1833	Cameroon	4	0	1	1	0	0	1	1	0.712	0.123333	0.164333	216	321	307	375	143	164	241
PRJNA550398	SAMN12126750	International Rice Research Institute	IRGC 104151	104151	NA		8.66667	14.1833	Cameroon	4	0	1	1	0	0	1	1	0.452	0.476667	0.071	216	321	307	375	143	164	241
PRJNA550398	SAMN12126749	International Rice Research Institute	IRGC 104149	104149	NA		10.8667	15.05	Cameroon	6	0	1	1	0	0	1	1	0.334333	0.522333	0.143	216	321	307	374	143	163	241
PRJNA550398	SAMN12126748	International Rice Research Institute	IRGC 104149	104149	NA		10.8667	15.05	Cameroon	6	0	1	1	0	0	1	1	0.342667	0.508333	0.149	216	321	307	374	143	163	241
PRJNA550398	SAMN12126747	International Rice Research Institute	IRGC 104147	104147	NA		10.1667	14.3333	Cameroon	4	0	1	1	0	0	1	1	0.808	0.127667	0.064	216	321	307	374	143	163	NA
PRJNA550398	SAMN12126746	International Rice Research Institute	IRGC 104147	104147	NA		10.1667	14.3333	Cameroon	4	0	1	1	0	0	1	1	0.757	0.204333	0.039	216	321	307	374	143	163	241
PRJNA550398	SAMN12126744	International Rice Research Institute	IRGC 104128	104128	NA		12.5833	16.5833	Chad	4	0	1	1	0	0	1	1	0.641333	0.358	0.000333333	216	321	307	374	143	163	241
PRJNA550398	SAMN12126743	International Rice Research Institute	IRGC 104127	104127	NA		10.4744	16.7247	Chad	4	0	1	1	0	0	1	1	0.232	0.413	0.355	216	321	307	375	143	NA	241
PRJNA550398	SAMN12126742	International Rice Research Institute	IRGC 104127	104127	NA		10.4744	16.7247	Chad	4	0.017	0.983	0	0.025	0.001	0.973	2	0.339333	0.258667	0.402	216	321	307	374	143	163	241
PRJNA550398	SAMN12126741	International Rice Research Institute	IRGC 104126	104126	NA		9.66667	15	Chad	4	0	1	1	0	0	1	1	0.714333	0.282	0.00333333	216	321	307	374	143	163	241
PRJNA550398	SAMN12126740	International Rice Research Institute	IRGC 104126	104126	NA		9.66667	15	Chad	4	0	1	1	0	0	1	1	0.541667	0.458	0	216	321	306	374	143	163	241
PRJNA550398	SAMN12126739	International Rice Research Institute	IRGC 104100	104100	NA		-19.9667	23.4167	Botswana	4	0.002	0.998	0	0.015	0.004	0.98	2	0.282333	0.175667	0.542667	216	321	306	374	144	163	241
PRJNA550398	SAMN12126738	International Rice Research Institute	IRGC 104100	104100	NA		-19.9667	23.4167	Botswana	4	0.005	0.995	0	0.02	0.007	0.973	2	0.236667	0.110667	0.653	216	321	307	375	144	NA	241
PRJNA550398	SAMN12126737	International Rice Research Institute	IRGC 104080	104080	NA		12.7167	4.88333	Nigeria	4	0	1	1	0	0	1	1	0.523	0.456333	0.0203333	216	321	307	374	143	163	241
PRJNA550398	SAMN12126736	International Rice Research Institute	IRGC 104080	104080	NA		12.7167	4.88333	Nigeria	4	0	1	1	0	0	1	1	0.692	0.273667	0.035	216	321	307	374	143	163	241
PRJNA550398	SAMN12126735	International Rice Research Institute	IRGC 104079	104079	NA		13.2833	5.46667	Nigeria	6	0	1	1	0	0	1	1	0.449667	0.55	0	216	321	307	375	144	164	241
PRJNA550398	SAMN12126734	International Rice Research Institute	IRGC 104079	104079	NA		13.2833	5.46667	Nigeria	6	0	1	1	0	0	1	3	0.391333	0.608667	0	216	321	307	375	143	164	241
PRJNA550398	SAMN12126733	International Rice Research Institute	IRGC 104075	104075	NA		12.1	14.05	Nigeria	4	0	1	1	0	0	1	1	0.656333	0.100667	0.243	216	321	307	374	143	164	241
PRJNA550398	SAMN12126732	International Rice Research Institute	IRGC 104075	104075	NA		12.1	14.05	Nigeria	4	0	1	1	0	0	1	1	0.548667	0.451	0	216	321	307	374	143	163	241
PRJNA550398	SAMN12126731	International Rice Research Institute	IRGC 103916	103916	NA		-7.3	35.5333	Tanzania	4	0	1	1	0	0	1	1	0.908333	0.047	0.0443333	216	321	306	374	143	164	241
PRJNA550398	SAMN12126730	International Rice Research Institute	IRGC 103916	103916	NA		-7.3	35.5333	Tanzania	4	0	1	1	0	0	1	1	0.861333	0.109667	0.029	216	321	307	374	143	164	241
PRJNA550398	SAMN12126729	International Rice Research Institute	IRGC 103915	103915	NA		-7.78333	35.1667	Tanzania	4	0	1	1	0	0	1	1	0.911	0	0.089	216	321	307	374	143	164	241
PRJNA550398	SAMN12126728	International Rice Research Institute	IRGC 103915	103915	NA		-7.78333	35.1667	Tanzania	4	0	1	1	0	0	1	1	0.891	0	0.109	216	321	307	374	143	164	241
PRJNA550398	SAMN12126727	International Rice Research Institute	IRGC 103913	103913	NA		-8.16667	36.6833	Tanzania	4	0	1	1	0	0	1	1	0.789667	0.21	0	216	321	306	375	143	164	241
PRJNA550398	SAMN12126726	International Rice Research Institute	IRGC 103913	103913	NA		-8.16667	36.6833	Tanzania	4	0	1	1	0	0	1	1	0.826333	0.131667	0.0416667	216	321	306	375	143	164	241
PRJNA550398	SAMN12126725	International Rice Research Institute	IRGC 103905	103905	NA		-6.05	39.2833	Tanzania	4	0	1	1	0	0	1	1	0.814	0.174333	0.0113333	216	320	307	375	143	164	241
PRJNA550398	SAMN12126724	International Rice Research Institute	IRGC 103904	103904	NA		-5.1	30.8333	Tanzania	4	0	1	1	0	0	1	1	0.559667	0.334333	0.106	216	321	307	374	143	165	241
PRJNA550398	SAMN12126723	International Rice Research Institute	IRGC 103904	103904	NA		-5.1	30.8333	Tanzania	4	0	1	1	0	0	1	1	0.628	0.318667	0.053	216	321	306	374	143	165	241
PRJNA550398	SAMN12126722	International Rice Research Institute	IRGC 103902	103902	NA		-5.88333	35.2333	Tanzania	4	0	1	1	0	0	1	1	0.914	0.0586667	0.0276667	216	321	307	374	143	164	241
PRJNA550398	SAMN12126721	International Rice Research Institute	IRGC 103900	103900	NA		-5.38333	35.85	Tanzania	6	0	1	1	0	0	1	1	0.472	0.525	0.003	216	321	306	374	143	163	241
PRJNA550398	SAMN12126720	International Rice Research Institute	IRGC 103900	103900	NA		-5.38333	35.85	Tanzania	4	0	1	1	0	0	1	1	0.607667	0.274667	0.117667	216	321	307	375	143	164	241
PRJNA550398	SAMN12126719	International Rice Research Institute	IRGC 103890	103890	NA		12.5706	-16.1478	Senegal	4	0	1	1	0	0	1	1	0.860333	0.0226667	0.117	216	321	307	374	143	164	241
PRJNA550398	SAMN12126718	International Rice Research Institute	IRGC 103890	103890	NA		12.5706	-16.1478	Senegal	4	0	1	1	0	0	1	1	0.727	0.238	0.035	216	321	307	374	143	164	241
PRJNA550398	SAMN12126717	International Rice Research Institute	IRGC 103886	103886	NA		-2.55	32.55	Tanzania	4	0.186	0.814	0	0.19	0	0.809	NA	NA	NA	NA	216	321	307	375	143	164	241
PRJNA550398	SAMN12126716	International Rice Research Institute	IRGC 103886	103886	NA		-2.55	32.55	Tanzania	6	0.335	0.665	0	0.337	0	0.663	NA	NA	NA	NA	216	321	307	375	143	163	241
PRJNA550398	SAMN12126715	International Rice Research Institute	IRGC 103560	103560	NA		14.8169	-4.26639	Mali	6	0	1	1	0	0	1	3	0.148333	0.696333	0.155667	216	321	307	374	143	163	241
PRJNA550398	SAMN12126714	International Rice Research Institute	IRGC 103560	103560	NA		14.8169	-4.26639	Mali	6	0	1	1	0	0	1	3	0.001	0.999	0.000666667	216	321	307	374	143	163	241
PRJNA550398	SAMN12126713	International Rice Research Institute	IRGC 101776	101776	NA		12.9372	-13.4106	Senegal	6	0	1	1	0	0	1	1	0.448333	0.534333	0.017	216	321	307	375	143	164	241
PRJNA550398	SAMN12126712	International Rice Research Institute	IRGC 101776	101776	NA		12.9372	-13.4106	Senegal	4	0	1	1	0	0	1	1	0.678333	0.233667	0.088	216	321	307	375	143	164	241
PRJNA550398	SAMN12126711	International Rice Research Institute	IRGC 101763	101763	NA		16.4561	-15.6833	Senegal	6	0	1	1	0	0	1	3	0.227	0.773	0	216	321	307	374	143	164	241
PRJNA550398	SAMN12126710	International Rice Research Institute	IRGC 101763	101763	NA		16.4561	-15.6833	Senegal	4	0	1	1	0	0	1	1	0.468	0.512	0.02	216	321	307	374	143	164	241
PRJNA550398	SAMN12126709	International Rice Research Institute	IRGC 101754	101754	NA		16.4561	-15.6833	Senegal	4	0	1	1	0	0	1	1	0.549	0.406	0.045	216	321	307	374	143	164	241
PRJNA550398	SAMN12126708	International Rice Research Institute	IRGC 101754	101754	NA		16.4561	-15.6833	Senegal	6	0	1	1	0	0	1	3	0.393	0.593667	0.014	216	321	307	374	143	164	241
PRJNA550398	SAMN12126707	International Rice Research Institute	IRGC 101741	101741	NA		14.4994	-14.4456	Senegal	2	0.878	0.122	0	0.787	0.036	0.177	NA	NA	NA	NA	212	321	307	374	143	164	241
PRJNA550398	SAMN12126706	International Rice Research Institute	IRGC 101741	101741	NA		14.4994	-14.4456	Senegal	4	0	1	1	0	0	1	1	0.92	0.0353333	0.0446667	212	321	307	374	143	163	232
PRJNA550398	SAMN12126705	International Rice Research Institute	IRGC 101436	101436	NA		-17.4892	48.4258	Madagascar	4	0	1	1	0	0	1	1	0.904333	0.047	0.0486667	216	321	307	375	143	164	241
PRJNA550398	SAMN12126704	International Rice Research Institute	IRGC 101436	101436	NA		-17.4892	48.4258	Madagascar	6	0	1	1	0	0	1	3	0.382333	0.617333	0	216	321	306	375	143	164	241
PRJNA550398	SAMN12126703	International Rice Research Institute	IRGC 101431	101431	NA		-7	37	Tanzania	4	0.022	0.978	0	0.024	0.001	0.975	1	0.847333	0.141	0.012	216	321	306	375	143	164	241
PRJNA550398	SAMN12126702	International Rice Research Institute	IRGC 101431	101431	NA		-7	37	Tanzania	4	0.046	0.954	0	0.05	0.001	0.949	NA	NA	NA	NA	216	321	306	375	143	164	241
PRJNA550398	SAMN12126701	International Rice Research Institute	IRGC 101383	101383	NA		13.8783	-5.69972	Mali	4	0.021	0.979	0	0.032	0.004	0.964	2	0	0.446	0.554	216	321	307	375	143	164	241
PRJNA550398	SAMN12126700	International Rice Research Institute	IRGC 101383	101383	NA		13.8783	-5.69972	Mali	6	0	1	1	0	0	1	3	0.0263333	0.973667	0	216	321	307	375	143	164	241
PRJNA550398	SAMN12126699	International Rice Research Institute	IRGC 101254	101254	NA		12.4467	-1.56222	Burkina Faso	4	0	1	1	0	0	1	1	0.631667	0.344333	0.0243333	216	320	307	375	143	164	241
PRJNA550398	SAMN12126698	International Rice Research Institute	IRGC 101254	101254	NA		12.4467	-1.56222	Burkina Faso	6	0	1	1	0	0	1	3	0.303	0.697	0	216	321	307	375	NA	164	241
PRJNA550398	SAMN12126697	International Rice Research Institute	IRGC 101245	101245	NA		13.8333	-5.65361	Mali	4	0	1	1	0	0	1	1	0.55	0.45	0.000333333	216	321	307	375	143	164	241
PRJNA550398	SAMN12126696	International Rice Research Institute	IRGC 101245	101245	NA		13.8333	-5.65361	Mali	6	0	1	1	0	0	1	1	0.356	0.556	0.088	216	321	307	375	143	164	241
PRJNA550398	SAMN12126695	International Rice Research Institute	IRGC 101230	101230	NA		9.01111	-12.9519	Sierra Leone	6	0	1	1	0	0	1	1	0.431333	0.545667	0.023	216	321	307	375	143	164	241
PRJNA550398	SAMN12126694	International Rice Research Institute	IRGC 101230	101230	NA		9.01111	-12.9519	Sierra Leone	6	0	1	1	0	0	1	3	0.076	0.924	0	216	321	307	373	143	164	241
PRJNA550398	SAMN12126693	International Rice Research Institute	IRGC 101229	101229	NA		NA	NA	Sierra Leone	6	0	1	1	0	0	1	3	0.034	0.966	0	216	321	307	373	143	164	241
PRJNA550398	SAMN12126692	International Rice Research Institute	IRGC 101229	101229	NA		NA	NA	Sierra Leone	4	0.002	0.998	0	0.016	0.004	0.98	2	0.036	0.404333	0.56	216	321	307	373	143	164	241
PRJNA550398	SAMN12126691	International Rice Research Institute	IRGC 101228	101228	NA		9.01111	-12.9519	Sierra Leone	6	0	1	1	0	0	1	3	0.274	0.726	0	216	321	307	374	143	164	241
PRJNA550398	SAMN12126690	International Rice Research Institute	IRGC 101228	101228	NA		9.01111	-12.9519	Sierra Leone	6	0	1	1	0	0	1	3	0.164	0.835667	0	216	321	307	373	143	164	241
PRJNA550398	SAMN12126689	International Rice Research Institute	IRGC 101225	101225	NA		14.5	-4.83333	Mali	6	0	1	1	0	0	1	3	0.234	0.765333	0	216	320	306	375	143	164	241
PRJNA550398	SAMN12126688	International Rice Research Institute	IRGC 101225	101225	NA		14.5	-4.83333	Mali	6	0	1	1	0	0	1	3	0.226	0.773333	0.001	216	320	306	375	143	164	241
PRJNA550398	SAMN12126687	International Rice Research Institute	IRGC 101223	101223	NA		14.5	-4.83333	Mali	4	0	1	1	0	0	1	1	0.491667	0.454	0.054	216	320	307	375	143	164	241
PRJNA550398	SAMN12126686	International Rice Research Institute	IRGC 101223	101223	NA		14.5	-4.83333	Mali	6	0	1	1	0	0	1	3	0.0106667	0.989333	0	216	321	307	375	143	164	241
PRJNA550398	SAMN12126685	International Rice Research Institute	IRGC 101222	101222	NA		13.8333	-4.91667	Mali	6	0.421	0.579	0	0.422	0	0.577667	NA	NA	NA	NA	216	321	307	374	143	163	241
PRJNA550398	SAMN12126684	International Rice Research Institute	IRGC 101222	101222	NA		13.8333	-4.91667	Mali	4	0.239	0.761	0	0.243	0	0.757	NA	NA	NA	NA	216	321	307	374	143	163	241
PRJNA550398	SAMN12126683	International Rice Research Institute	IRGC 101221	101221	NA		13.8333	-4.91667	Mali	6	0	1	1	0	0	1	3	0.318	0.674333	0.008	216	321	307	375	143	164	NA
PRJNA550398	SAMN12126682	International Rice Research Institute	IRGC 101221	101221	NA		13.8333	-4.91667	Mali	4	0	1	1	0	0	1	1	0.561333	0.432333	0.00633333	216	321	307	375	143	164	241
PRJNA550398	SAMN12126681	International Rice Research Institute	IRGC 101220	101220	NA		13.8333	-4.91667	Mali	6	0.005	0.995	0	0.006	0	0.994	3	0.0513333	0.947	0.002	216	321	307	375	143	164	241
PRJNA550398	SAMN12126680	International Rice Research Institute	IRGC 101220	101220	NA		13.8333	-4.91667	Mali	6	0	1	1	0	0	1	3	0.330333	0.668667	0.001	216	321	307	375	143	164	241
PRJNA550398	SAMN12126679	International Rice Research Institute	IRGC 101219	101219	NA		13.5	-5.75	Mali	4	0	1	1	0	0	1	1	0.594	0.332	0.074	216	321	307	374	143	164	241
PRJNA550398	SAMN12126678	International Rice Research Institute	IRGC 101219	101219	NA		13.5	-5.75	Mali	4	0.008	0.992	0	0.02	0.008	0.972	2	0.501	0	0.499	216	321	307	374	143	164	241
PRJNA550398	SAMN12126677	International Rice Research Institute	IRGC 101216	101216	NA		9.75	-6	Côte D'Ivoire	6	0	1	1	0	0	1	3	0.237333	0.745667	0.017	216	320	306	375	143	164	241
PRJNA550398	SAMN12126676	International Rice Research Institute	IRGC 101216	101216	NA		9.75	-6	Côte D'Ivoire	6	0	1	1	0	0	1	3	0.258667	0.741333	0	216	320	306	375	143	164	241
PRJNA550398	SAMN12126675	International Rice Research Institute	IRGC 101215	101215	NA		9.83333	-5.75	Côte D'Ivoire	4	0	1	1	0	0	1	1	0.774667	0.225333	0	216	321	307	375	143	164	241
PRJNA550398	SAMN12126674	International Rice Research Institute	IRGC 101215	101215	NA		9.83333	-5.75	Côte D'Ivoire	4	0	1	1	0	0	1	1	0.881333	0.118333	0	216	321	307	375	143	164	241
PRJNA550398	SAMN12126673	International Rice Research Institute	IRGC 101214	101214	NA		9.8	-5.75	Côte D'Ivoire	6	0.006	0.994	0	0.007	0	0.992	3	0.064	0.934	0.002	216	321	307	375	143	164	241
PRJNA550398	SAMN12126672	International Rice Research Institute	IRGC 101214	101214	NA		9.8	-5.75	Côte D'Ivoire	6	0	1	1	0	0	1	3	0.044	0.955667	0	216	321	307	375	143	164	241
PRJNA550398	SAMN12126671	International Rice Research Institute	IRGC 101213	101213	NA		9.83333	-5.75	Côte D'Ivoire	6	0.008	0.992	0	0.01	0	0.99	3	0.004	0.986667	0.00933333	216	321	307	375	143	164	241
PRJNA550398	SAMN12126670	International Rice Research Institute	IRGC 101213	101213	NA		9.83333	-5.75	Côte D'Ivoire	6	0.022	0.978	0	0.025	0.001	0.975	3	0.205333	0.741	0.0536667	216	321	307	375	143	164	241
PRJNA550398	SAMN12126669	International Rice Research Institute	IRGC 101211	101211	NA		9.75	-5.75	Côte D'Ivoire	6	0.316	0.684	0	0.319	0	0.681	NA	NA	NA	NA	216	321	307	375	143	164	241
PRJNA550398	SAMN12126668	International Rice Research Institute	IRGC 101211	101211	NA		9.75	-5.75	Côte D'Ivoire	2	0.714	0.286	0	0.709667	0.001	0.29	NA	NA	NA	NA	216	321	307	375	144	164	241
PRJNA550398	SAMN12126667	International Rice Research Institute	IRGC 101210	101210	NA		9.75	-5.66667	Côte D'Ivoire	6	0	1	1	0	0	1	3	0.018	0.982	0	216	NA	307	375	143	164	241
PRJNA550398	SAMN12126666	International Rice Research Institute	IRGC 101210	101210	NA		9.75	-5.66667	Côte D'Ivoire	6	0	1	1	0	0	1	3	0.0506667	0.949333	0	216	321	307	375	143	164	241
PRJNA550398	SAMN12126665	International Rice Research Institute	IRGC 101207	101207	NA		9.75	-5.16667	Côte D'Ivoire	6	0	1	1	0	0	1	3	0.220667	0.779333	0	216	321	307	374	142	163	NA
PRJNA550398	SAMN12126664	International Rice Research Institute	IRGC 101207	101207	NA		9.75	-5.16667	Côte D'Ivoire	4	0	1	1	0	0	1	1	0.687333	0.312667	0	216	321	307	374	142	163	NA
PRJNA550398	SAMN12126663	International Rice Research Institute	IRGC 101206	101206	NA		6.58333	2.5	Benin	4	0	1	1	0	0	1	1	0.716	0.283	0.001	216	321	307	375	143	164	241
PRJNA550398	SAMN12126662	International Rice Research Institute	IRGC 101206	101206	NA		6.58333	2.5	Benin	4	0	1	1	0	0	1	1	0.69	0.309667	0	216	321	307	375	143	164	241
PRJNA550398	SAMN12126661	International Rice Research Institute	IRGC 101205	101205	NA		6.5	2.5	Benin	6	0	1	1	0	0	1	1	0.472	0.528	0	216	321	307	375	143	164	241
PRJNA550398	SAMN12126660	International Rice Research Institute	IRGC 101205	101205	NA		6.5	2.5	Benin	4	0	1	1	0	0	1	1	0.723	0.277	0	216	321	307	375	143	164	241
PRJNA550398	SAMN12126659	International Rice Research Institute	IRGC 101204	101204	NA		9.03333	6.16667	Nigeria	4	0	1	1	0	0	1	1	0.535	0.449667	0.015	216	321	306	375	143	164	241
PRJNA550398	SAMN12126658	International Rice Research Institute	IRGC 101204	101204	NA		9.03333	6.16667	Nigeria	4	0.001	0.999	0	0.005	0.001	0.995	1	0.347667	0.452667	0.199333	216	321	307	375	143	164	241
PRJNA550398	SAMN12126657	International Rice Research Institute	IRGC 101203	101203	NA		9.03333	6.16667	Nigeria	6	0	1	1	0	0	1	1	0.424	0.576	0	216	321	307	375	143	164	241
PRJNA550398	SAMN12126656	International Rice Research Institute	IRGC 101203	101203	NA		9.03333	6.16667	Nigeria	6	0	1	1	0	0	1	3	0.304	0.691	0.005	216	321	307	375	143	164	241
PRJNA550398	SAMN12126655	International Rice Research Institute	IRGC 101202	101202	NA		9.03333	6.16667	Nigeria	4	0	1	1	0.002	0	0.998	1	0.592	0.372667	0.0356667	216	321	307	375	143	164	241
PRJNA550398	SAMN12126654	International Rice Research Institute	IRGC 101202	101202	NA		9.03333	6.16667	Nigeria	4	0	1	1	0	0	1	1	0.63	0.350333	0.0193333	216	321	307	375	143	164	241
PRJNA550398	SAMN12126653	International Rice Research Institute	IRGC 101200	101200	NA		12.9986	7.61889	Nigeria	6	0	1	1	0	0	1	3	0.207333	0.792333	0	216	321	307	375	143	164	241
PRJNA550398	SAMN12126652	International Rice Research Institute	IRGC 101200	101200	NA		12.9986	7.61889	Nigeria	6	0	1	1	0	0	1	3	0.230333	0.707	0.0623333	216	321	307	375	143	164	241
PRJNA550398	SAMN12126651	International Rice Research Institute	IRGC 101199	101199	NA		10.8333	15	Cameroon	6	0	1	1	0	0	1	1	0.501	0.498667	0	216	321	307	374	143	163	241
PRJNA550398	SAMN12126650	International Rice Research Institute	IRGC 101199	101199	NA		10.8333	15	Cameroon	6	0	1	1	0	0	1	1	0.477667	0.522333	0	216	321	307	374	143	164	NA
PRJNA550398	SAMN12126649	International Rice Research Institute	IRGC 101198	101198	NA		10.5	15	Cameroon	4	0	1	1	0	0	1	1	0.637333	0.362667	0	216	NA	307	374	143	163	241
PRJNA550398	SAMN12126648	International Rice Research Institute	IRGC 101198	101198	NA		10.5	15	Cameroon	6	0.014	0.986	0	0.015	0	0.984	1	0.421667	0.561333	0.017	216	321	306	374	143	163	NA
PRJNA550398	SAMN12126647	International Rice Research Institute	IRGC 100930	100930	NA		14.7333	-6.03333	Mali	1	0.99	0.01	0	0.042	0.936	0.022	NA	NA	NA	NA	212	321	306	373	143	163	241
PRJNA550398	SAMN12126646	International Rice Research Institute	IRGC 100930	100930	NA		14.7333	-6.03333	Mali	1	0.998	0.002	0	0.039	0.944	0.017	NA	NA	NA	NA	212	321	307	373	143	163	241
PRJNA550398	SAMN12126645	International Rice Research Institute	IRGC 99553	99553	NA		-11.4881	29.6053	Zambia	4	0.018	0.982	0	0.029	0.00666667	0.964	2	0.457333	0.04	0.503	216	321	307	374	143	163	241
PRJNA550398	SAMN12126644	International Rice Research Institute	IRGC 99553	99553	NA		-11.4881	29.6053	Zambia	4	0	1	1	0	0	1	1	0.723	0.247	0.03	216	321	306	374	143	163	NA
PRJNA550398	SAMN12126643	International Rice Research Institute	IRGC 92664	92664	NA		11.5	14.6833	Cameroon	4	0	1	1	0	0	1	1	0.778	0.222	0	216	321	307	375	143	163	241
PRJNA550398	SAMN12126642	International Rice Research Institute	IRGC 92664	92664	NA		11.5	14.6833	Cameroon	4	0	1	1	0	0	1	1	0.732	0.268	0	216	321	307	375	143	163	241
PRJNA550398	SAMN12126641	International Rice Research Institute	IRGC 92662	92662	NA		11.25	14.6667	Cameroon	4	0	1	1	0	0	1	1	0.828	0.171667	0	216	321	307	374	143	164	241
PRJNA550398	SAMN12126640	International Rice Research Institute	IRGC 92662	92662	NA		11.25	14.6667	Cameroon	4	0	1	1	0	0	1	1	0.731667	0.268333	0	216	321	307	375	143	163	241
PRJNA550398	SAMN12126639	International Rice Research Institute	IRGC 92661	92661	NA		11.2667	14.6167	Cameroon	4	0	1	1	0	0	1	1	0.715	0.284333	0	216	321	307	374	143	163	241
PRJNA550398	SAMN12126638	International Rice Research Institute	IRGC 92661	92661	NA		11.2667	14.6167	Cameroon	4	0	1	1	0	0	1	1	0.699	0.301	0	216	321	307	374	143	163	241
PRJNA550398	SAMN12126637	International Rice Research Institute	IRGC 92659	92659	NA		14.05	-4.23333	Mali	6	0	1	1	0	0	1	3	0	1	0	216	NA	307	375	144	164	241
PRJNA550398	SAMN12126636	International Rice Research Institute	IRGC 92659	92659	NA		14.05	-4.23333	Mali	6	0	1	1	0	0	1	3	0.00166667	0.998333	0	216	321	307	375	144	164	241
PRJNA550398	SAMN12126635	International Rice Research Institute	IRGC 92658	92658	NA		14.5167	-4.18333	Mali	6	0	1	1	0	0	1	3	0	1	0	216	321	307	374	143	164	241
PRJNA550398	SAMN12126634	International Rice Research Institute	IRGC 92658	92658	NA		14.5167	-4.18333	Mali	6	0	1	1	0	0	1	3	0.000333333	0.999	0	216	321	307	374	143	164	241
PRJNA550398	SAMN12126633	International Rice Research Institute	IRGC 92657	92657	NA		14.5333	-4.18333	Mali	6	0	1	1	0	0	1	3	0.001	0.999	0	216	321	307	374	143	164	241
PRJNA550398	SAMN12126632	International Rice Research Institute	IRGC 92656	92656	NA		14.3	-4.13333	Mali	6	0	1	1	0	0	1	3	0	1	0	216	321	307	375	143	164	241
PRJNA550398	SAMN12126631	International Rice Research Institute	IRGC 92656	92656	NA		14.3	-4.13333	Mali	6	0	1	1	0	0	1	3	0	1	0	216	321	307	373	143	164	241
PRJNA550398	SAMN12126630	International Rice Research Institute	IRGC 92655	92655	NA		14.3167	-4.1	Mali	4	0	1	1	0	0	1	1	0.347	0.462	0.190333	216	321	307	373	143	164	241
PRJNA550398	SAMN12126629	International Rice Research Institute	IRGC 92655	92655	NA		14.3167	-4.1	Mali	6	0	1	1	0	0	1	3	0	1	0	216	320	306	375	143	164	241
PRJNA550398	SAMN12126628	International Rice Research Institute	IRGC 92654	92654	NA		14.3667	-4.2	Mali	6	0	1	1	0	0	1	3	0	0.999333	0	216	321	307	374	143	164	241
PRJNA550398	SAMN12126627	International Rice Research Institute	IRGC 92654	92654	NA		14.3667	-4.2	Mali	6	0	1	1	0	0	1	3	0	1	0	216	NA	307	374	143	164	241
PRJNA550398	SAMN12126626	International Rice Research Institute	IRGC 92653	92653	NA		14.25	-4.15	Mali	6	0	1	1	0	0	1	3	0.342667	0.641	0.016	216	321	307	374	143	164	241
PRJNA550398	SAMN12126625	International Rice Research Institute	IRGC 92653	92653	NA		14.25	-4.15	Mali	6	0	1	1	0	0	1	3	0	1	0	216	321	307	375	143	164	241
PRJNA550398	SAMN12126624	International Rice Research Institute	IRGC 92652	92652	NA		14.25	-4.15	Mali	6	0	1	1	0	0	1	3	0	1	0	216	321	307	375	143	164	241
PRJNA550398	SAMN12126623	International Rice Research Institute	IRGC 92652	92652	NA		14.25	-4.15	Mali	6	0	1	1	0	0	1	3	0	1	0	216	321	307	375	143	164	241
PRJNA550398	SAMN12126622	International Rice Research Institute	IRGC 92651	92651	NA		13.2333	-4.86667	Mali	6	0	1	1	0	0	1	3	0.038	0.961	0.001	216	321	307	375	143	164	241
PRJNA550398	SAMN12126621	International Rice Research Institute	IRGC 92650	92650	NA		14.2	-5	Mali	6	0.393	0.607	0	0.386	0.00966667	0.605	NA	NA	NA	NA	216	321	307	373	143	164	241
PRJNA550398	SAMN12126620	International Rice Research Institute	IRGC 92650	92650	NA		14.2	-5	Mali	6	0	1	1	0	0	1	3	0.0116667	0.988	0	216	321	307	373	143	164	241
PRJNA550398	SAMN12126619	International Rice Research Institute	IRGC 92649	92649	NA		14.4333	-4.28333	Mali	6	0	1	1	0	0	1	3	0.001	0.999	0	216	321	307	374	143	164	241
PRJNA550398	SAMN12126618	International Rice Research Institute	IRGC 92649	92649	NA		14.4333	-4.28333	Mali	6	0	1	1	0	0	1	3	0.001	0.999	0	216	321	307	374	143	164	241
PRJNA550398	SAMN12126617	International Rice Research Institute	IRGC 92648	92648	NA		14.2	-4.5	Mali	4	0	1	1	0	0	1	1	0.609	0.390667	0	216	321	307	374	143	163	241
PRJNA550398	SAMN12126616	International Rice Research Institute	IRGC 92648	92648	NA		14.2	-4.5	Mali	4	0	1	1	0	0	1	1	0.303667	0.43	0.266333	216	321	307	374	143	164	241
PRJNA550398	SAMN12126615	International Rice Research Institute	IRGC 92647	92647	NA		14.5167	-4.11667	Mali	6	0	1	1	0	0	1	3	0.0113333	0.988667	0	216	321	307	374	143	164	241
PRJNA550398	SAMN12126614	International Rice Research Institute	IRGC 92647	92647	NA		14.5167	-4.11667	Mali	6	0	1	1	0	0	1	3	0.000333333	0.999667	0	216	321	307	374	142	163	241
PRJNA550398	SAMN12126613	International Rice Research Institute	IRGC 92645	92645	NA		14.75	-4.03333	Mali	6	0	1	1	0	0	1	3	0.008	0.992	0	216	321	307	374	143	164	241
PRJNA550398	SAMN12126612	International Rice Research Institute	IRGC 92645	92645	NA		14.75	-4.03333	Mali	6	0	1	1	0	0	1	3	0	1	0	216	321	307	374	143	164	NA
PRJNA550398	SAMN12126611	International Rice Research Institute	IRGC 92644	92644	NA		15.1333	-4.26667	Mali	6	0	1	1	0	0	1	3	0	1	0	216	NA	307	375	143	164	241
PRJNA550398	SAMN12126610	International Rice Research Institute	IRGC 92643	92643	NA		15.1167	-3.9	Mali	6	0.006	0.994	0	0.001	0.007	0.991	3	0	0.982	0.017	216	321	307	375	143	164	241
PRJNA550398	SAMN12126609	International Rice Research Institute	IRGC 92643	92643	NA		15.1167	-3.9	Mali	6	0	1	1	0	0	1	3	0	1	0	216	321	307	375	143	164	241
PRJNA550398	SAMN12126608	International Rice Research Institute	IRGC 92642	92642	NA		14.5167	-4.15	Mali	6	0	1	1	0	0	1	3	0	1	0	216	321	NA	375	143	164	241
PRJNA550398	SAMN12126607	International Rice Research Institute	IRGC 92642	92642	NA		14.5167	-4.15	Mali	6	0	1	1	0	0	1	3	0	1	0	216	321	307	375	143	164	241
PRJNA550398	SAMN12126606	International Rice Research Institute	IRGC 92641	92641	NA		14.5	-4.16667	Mali	6	0	1	1	0	0	1	3	0	1	0	NA	321	307	375	143	164	241
PRJNA550398	SAMN12126605	International Rice Research Institute	IRGC 92641	92641	NA		14.5	-4.16667	Mali	6	0	1	1	0	0	1	3	0	1	0	216	321	307	374	143	NA	NA
PRJNA550398	SAMN12126604	International Rice Research Institute	IRGC 92640	92640	NA		15.4167	-4.28333	Mali	6	0	1	1	0	0	1	3	0	1	0	216	321	307	375	143	164	241
PRJNA550398	SAMN12126603	International Rice Research Institute	IRGC 92640	92640	NA		15.4167	-4.28333	Mali	6	0	1	1	0	0	1	3	0	1	0	216	321	307	374	143	163	241
PRJNA550398	SAMN12126602	International Rice Research Institute	IRGC 92639	92639	NA		15.1333	-4.25	Mali	6	0	1	1	0	0	1	3	0	1	0	216	321	307	375	143	164	241
PRJNA550398	SAMN12126601	International Rice Research Institute	IRGC 92638	92638	NA		14.9667	-4.26667	Mali	6	0	1	1	0	0	1	3	0.000666667	0.999	0	NA	321	307	375	143	164	241
PRJNA550398	SAMN12126600	International Rice Research Institute	IRGC 92637	92637	NA		14.7667	-4	Mali	6	0	1	1	0	0	1	3	0.391667	0.607333	0.001	216	321	307	373	143	164	241
PRJNA550398	SAMN12126599	International Rice Research Institute	IRGC 92637	92637	NA		14.7667	-4	Mali	6	0	1	1	0	0	1	3	0	1	0	216	321	307	375	143	164	241
PRJNA550398	SAMN12126598	International Rice Research Institute	IRGC 92636	92636	NA		14.8333	-3.96667	Mali	6	0	1	1	0	0	1	3	0.00466667	0.995333	0	216	320	307	NA	143	164	241
PRJNA550398	SAMN12126597	International Rice Research Institute	IRGC 92636	92636	NA		14.8333	-3.96667	Mali	6	0	1	1	0	0	1	3	0	1	0	216	320	306	375	143	164	NA
PRJNA550398	SAMN12126596	International Rice Research Institute	IRGC 92635	92635	NA		14.4833	-4.16667	Mali	6	0	1	1	0	0	1	3	0	1	0	216	321	307	374	143	163	241
PRJNA550398	SAMN12126595	International Rice Research Institute	IRGC 92634	92634	NA		14.4833	-4.16667	Mali	6	0	1	1	0	0	1	3	0.317	0.683	0	216	320	306	375	143	164	241
PRJNA550398	SAMN12126594	International Rice Research Institute	IRGC 92634	92634	NA		14.4833	-4.16667	Mali	6	0	1	1	0	0	1	3	0.314333	0.685667	0	216	321	307	375	143	164	241
PRJNA550398	SAMN12126593	International Rice Research Institute	IRGC 92633	92633	NA		14.6167	-4.16667	Mali	6	0	1	1	0	0	1	3	0.001	0.999	0	216	321	307	374	143	164	241
PRJNA550398	SAMN12126592	International Rice Research Institute	IRGC 92633	92633	NA		14.6167	-4.16667	Mali	6	0	1	1	0	0	1	3	0.00933333	0.990333	0	216	320	306	375	143	164	241
PRJNA550398	SAMN12126591	International Rice Research Institute	IRGC 92632	92632	NA		14.5167	-4.2	Mali	6	0	1	1	0	0	1	3	0	1	0	216	321	307	375	143	164	241
PRJNA550398	SAMN12126590	International Rice Research Institute	IRGC 92632	92632	NA		14.5167	-4.2	Mali	6	0	1	1	0	0	1	3	0	1	0	216	321	307	375	143	164	241
PRJNA550398	SAMN12126589	International Rice Research Institute	IRGC 92631	92631	NA		14.4	-4.13333	Mali	6	0	1	1	0	0	1	3	0.003	0.996667	0	216	320	306	375	143	164	241
PRJNA550398	SAMN12126588	International Rice Research Institute	IRGC 92631	92631	NA		14.4	-4.13333	Mali	6	0	1	1	0	0	1	3	0	1	0	NA	321	307	375	143	164	241
PRJNA550398	SAMN12126587	International Rice Research Institute	IRGC 92628	92628	NA		14.4667	-4.15	Mali	6	0	1	1	0	0	1	3	0.00333333	0.996667	0	216	321	307	NA	143	164	241
PRJNA550398	SAMN12126586	International Rice Research Institute	IRGC 92628	92628	NA		14.4667	-4.15	Mali	6	0	1	1	0	0	1	3	0	1	0	216	321	307	375	143	164	241
PRJNA550398	SAMN12126585	International Rice Research Institute	IRGC 92627	92627	NA		15.2667	-3.85	Mali	6	0	1	1	0	0	1	3	0	1	0	216	321	307	375	143	164	241
PRJNA550398	SAMN12126584	International Rice Research Institute	IRGC 92627	92627	NA		15.2667	-3.85	Mali	6	0	1	1	0	0	1	3	0	1	0	216	321	307	375	143	164	241
PRJNA550398	SAMN12126583	International Rice Research Institute	IRGC 92626	92626	NA		15.2667	-3.85	Mali	6	0	1	1	0	0	1	3	0	1	0	216	321	307	374	142	163	241
PRJNA550398	SAMN12126582	International Rice Research Institute	IRGC 92626	92626	NA		15.2667	-3.85	Mali	6	0	1	1	0	0	1	3	0	1	0	216	320	306	375	143	164	241
PRJNA550398	SAMN12126581	International Rice Research Institute	IRGC 92625	92625	NA		14.4167	-4.2	Mali	6	0	1	1	0	0	1	3	0	1	0	216	NA	307	374	142	163	241
PRJNA550398	SAMN12126580	International Rice Research Institute	IRGC 92624	92624	NA		14.35	-4.26667	Mali	6	0	1	1	0	0	1	3	0	1	0	216	321	307	374	143	164	241
PRJNA550398	SAMN12126579	International Rice Research Institute	IRGC 92624	92624	NA		14.35	-4.26667	Mali	6	0	1	1	0	0	1	3	0	1	0	216	321	307	375	143	164	241
PRJNA550398	SAMN12126578	International Rice Research Institute	IRGC 92623	92623	NA		13.8667	-4.6	Mali	6	0	1	1	0	0	1	3	0.01	0.99	0	216	321	307	374	143	164	241
PRJNA550398	SAMN12126577	International Rice Research Institute	IRGC 92623	92623	NA		13.8667	-4.6	Mali	6	0	1	1	0	0	1	3	0.001	0.999	0	216	321	307	375	143	164	241
PRJNA550398	SAMN12126576	International Rice Research Institute	IRGC 92622	92622	NA		13.9833	-4.53333	Mali	6	0	1	1	0	0	1	3	0	1	0	216	320	307	375	143	164	241
PRJNA550398	SAMN12126575	International Rice Research Institute	IRGC 92622	92622	NA		13.9833	-4.53333	Mali	6	0	1	1	0	0	1	3	0	1	0	216	320	306	375	143	164	241
PRJNA550398	SAMN12126574	International Rice Research Institute	IRGC 92621	92621	NA		13.9333	-4.66667	Mali	6	0	1	1	0	0	1	3	0.00933333	0.990667	0	216	321	307	373	143	164	241
PRJNA550398	SAMN12126573	International Rice Research Institute	IRGC 92621	92621	NA		13.9333	-4.66667	Mali	6	0	1	1	0	0	1	3	0.014	0.985667	0	216	321	307	375	143	164	241
PRJNA550398	SAMN12126572	International Rice Research Institute	IRGC 92620	92620	NA		14.2833	-4.15	Mali	6	0	1	1	0	0	1	3	0	1	0	216	321	307	374	143	164	241
PRJNA550398	SAMN12126571	International Rice Research Institute	IRGC 92620	92620	NA		14.2833	-4.15	Mali	6	0	1	1	0	0	1	3	0.001	0.999	0	216	320	306	375	143	164	241
PRJNA550398	SAMN12126570	International Rice Research Institute	IRGC 92619	92619	NA		14.5667	-4.21667	Mali	6	0	1	1	0	0	1	3	0	1	0	216	320	306	375	143	164	241
PRJNA550398	SAMN12126569	International Rice Research Institute	IRGC 92619	92619	NA		14.5667	-4.21667	Mali	6	0	1	1	0	0	1	3	0	1	0	216	321	307	375	143	164	241
PRJNA550398	SAMN12126568	International Rice Research Institute	IRGC 92618	92618	NA		14.7167	-4.18333	Mali	6	0	1	1	0	0	1	3	0	1	0	216	321	307	NA	143	164	241
PRJNA550398	SAMN12126567	International Rice Research Institute	IRGC 92618	92618	NA		14.7167	-4.18333	Mali	6	0	1	1	0	0	1	3	0	1	0	216	321	307	374	143	164	232
PRJNA550398	SAMN12126566	International Rice Research Institute	IRGC 92617	92617	NA		14.75	-4.2	Mali	6	0	1	1	0	0	1	3	0.000333333	0.999667	0	216	321	307	374	143	164	241
PRJNA550398	SAMN12126565	International Rice Research Institute	IRGC 92617	92617	NA		14.75	-4.2	Mali	6	0	1	1	0	0	1	3	0	1	0	216	321	307	374	143	164	241
PRJNA550398	SAMN12126564	International Rice Research Institute	IRGC 92616	92616	NA		14.25	-4.15	Mali	6	0	1	1	0	0	1	3	0	1	0	216	321	307	375	143	164	241
PRJNA550398	SAMN12126563	International Rice Research Institute	IRGC 92616	92616	NA		14.25	-4.15	Mali	6	0	1	1	0	0	1	3	0.001	0.999	0	216	321	307	375	NA	164	241
PRJNA550398	SAMN12126562	International Rice Research Institute	IRGC 92615	92615	NA		14.3167	-4.21667	Mali	6	0	1	1	0	0	1	3	0	1	0	216	321	307	375	143	164	241
PRJNA550398	SAMN12126561	International Rice Research Institute	IRGC 92615	92615	NA		14.3167	-4.21667	Mali	6	0	1	1	0	0	1	3	0	1	0	216	321	307	374	143	164	241
PRJNA550398	SAMN12126560	International Rice Research Institute	IRGC 92614	92614	NA		13.9667	-5.5	Mali	6	0	1	1	0	0	1	3	0.357	0.643	0	216	321	307	374	143	163	241
PRJNA550398	SAMN12126559	International Rice Research Institute	IRGC 92614	92614	NA		13.9667	-5.5	Mali	6	0	1	1	0	0	1	3	0.358333	0.641667	0	216	321	307	374	143	163	241
PRJNA550398	SAMN12126558	International Rice Research Institute	IRGC 92613	92613	NA		14.3667	-4.93333	Mali	6	0	1	1	0	0	1	3	0	1	0	216	321	307	375	143	NA	241
PRJNA550398	SAMN12126557	International Rice Research Institute	IRGC 92613	92613	NA		14.3667	-4.93333	Mali	6	0	1	1	0	0	1	3	0.018	0.982	0	216	321	307	374	143	164	241
PRJNA550398	SAMN12126556	International Rice Research Institute	IRGC 92612	92612	NA		14.45	-4.91667	Mali	6	0	1	1	0	0	1	3	0	1	0	216	321	307	375	143	164	241
PRJNA550398	SAMN12126555	International Rice Research Institute	IRGC 92612	92612	NA		14.45	-4.91667	Mali	6	0	1	1	0	0	1	3	0.043	0.956667	0	216	321	307	375	143	164	241
PRJNA550398	SAMN12126554	International Rice Research Institute	IRGC 92611	92611	NA		13.3	-5.1	Mali	6	0	1	1	0	0	1	3	0	1	0	NA	321	307	375	142	164	241
PRJNA550398	SAMN12126553	International Rice Research Institute	IRGC 92611	92611	NA		13.3	-5.1	Mali	6	0	1	1	0	0	1	3	0	1	0	216	321	307	374	143	164	NA
PRJNA550398	SAMN12126552	International Rice Research Institute	IRGC 92609	92609	NA		14.8333	-4.35	Mali	6	0	1	1	0	0	1	3	0	1	0	216	321	307	374	143	164	241
PRJNA550398	SAMN12126551	International Rice Research Institute	IRGC 92609	92609	NA		14.8333	-4.35	Mali	6	0	1	1	0	0	1	3	0.00233333	0.997667	0	216	321	307	375	143	164	241
PRJNA550398	SAMN12126549	International Rice Research Institute	IRGC 92607	92607	NA		14.9167	-4.31667	Mali	6	0	1	1	0	0	1	3	0	1	0	216	321	307	374	143	164	241
PRJNA550398	SAMN12126548	International Rice Research Institute	IRGC 89161	89161	NA		-17.6436	36.8458	Mozambique	6	0	1	1	0	0	1	1	0.412333	0.565	0.023	216	321	NA	374	143	163	NA
PRJNA550398	SAMN12126547	International Rice Research Institute	IRGC 89161	89161	NA		-17.6436	36.8458	Mozambique	4	0	1	1	0	0	1	1	0.759333	0.230667	0.01	216	321	307	374	143	164	241
PRJNA550398	SAMN12126546	International Rice Research Institute	IRGC 89160	89160	NA		-16.5269	39.3367	Mozambique	4	0	1	1	0	0	1	1	0.804333	0	0.195667	216	321	306	374	143	165	NA
PRJNA550398	SAMN12126545	International Rice Research Institute	IRGC 89160	89160	NA		-16.5269	39.3367	Mozambique	4	0	1	1	0	0	1	1	0.942	0.039	0.0183333	216	321	306	374	143	165	241
PRJNA550398	SAMN12126544	International Rice Research Institute	IRGC 89159	89159	NA		-15.2383	40.0978	Mozambique	4	0.378	0.622	0	0.368	0.014	0.619	NA	NA	NA	NA	216	321	306	375	143	164	241
PRJNA550398	SAMN12126543	International Rice Research Institute	IRGC 89159	89159	NA		-15.2383	40.0978	Mozambique	4	0	1	1	0	0	1	1	0.733667	0.225	0.0416667	216	321	NA	374	143	165	241
PRJNA550398	SAMN12126542	International Rice Research Institute	IRGC 89158	89158	NA		-15.0581	40.2144	Mozambique	4	0	1	1	0	0	1	1	1	0	0	216	321	307	374	143	163	241
PRJNA550398	SAMN12126541	International Rice Research Institute	IRGC 89158	89158	NA		-15.0581	40.2144	Mozambique	4	0	1	1	0	0	1	1	1	0	0	216	321	307	374	143	163	241
PRJNA550398	SAMN12126540	International Rice Research Institute	IRGC 89157	89157	NA		-15.0033	40.5094	Mozambique	4	0	1	1	0	0	1	1	0.999667	0	0	NA	321	306	374	143	163	241
PRJNA550398	SAMN12126539	International Rice Research Institute	IRGC 89157	89157	NA		-15.0033	40.5094	Mozambique	4	0	1	1	0	0	1	1	0.999	0	0.001	216	321	307	374	143	163	241
PRJNA550398	SAMN12126538	International Rice Research Institute	IRGC 89156	89156	NA		-14.9178	40.3919	Mozambique	4	0	1	1	0	0	1	1	0.921	0	0.079	216	321	306	375	143	164	241
PRJNA550398	SAMN12126537	International Rice Research Institute	IRGC 89156	89156	NA		-14.9178	40.3919	Mozambique	4	0.002	0.998	0	0.007	0.003	0.991	1	0.837	0.000333333	0.162333	216	321	306	374	143	164	241
PRJNA550398	SAMN12126536	International Rice Research Institute	IRGC 89155	89155	NA		-14.8983	40.905	Mozambique	4	0	1	1	0	0	1	1	0.965	0.015	0.02	216	321	307	375	143	165	241
PRJNA550398	SAMN12126535	International Rice Research Institute	IRGC 89155	89155	NA		-14.8983	40.905	Mozambique	4	0.247	0.753	0	0.244	0.01	0.746	NA	NA	NA	NA	216	321	NA	374	143	165	241
PRJNA550398	SAMN12126534	International Rice Research Institute	IRGC 89154	89154	NA		-8.9	29.45	Zambia	4	0.001	0.999	0	0.006	0.001	0.993	1	0.749333	0.084	0.166667	216	321	307	374	143	164	241
PRJNA550398	SAMN12126533	International Rice Research Institute	IRGC 89154	89154	NA		-8.9	29.45	Zambia	4	0	1	1	0.006	0.003	0.99	1	0.756333	0	0.243333	216	321	307	374	143	164	241
PRJNA550398	SAMN12126532	International Rice Research Institute	IRGC 89153	89153	NA		-8.76667	31.1	Zambia	4	0	1	1	0	0	1	1	0.651	0.143	0.206	216	321	306	374	143	164	241
PRJNA550398	SAMN12126531	International Rice Research Institute	IRGC 89153	89153	NA		-8.76667	31.1	Zambia	4	0	1	1	0	0	1	1	0.681333	0.203	0.115667	216	321	306	374	143	NA	241
PRJNA550398	SAMN12126530	International Rice Research Institute	IRGC 89152	89152	NA		-17.5	24.8	Zambia	5	0.035	0.965	0	0.052	0.019	0.929	2	0	0	1	216	321	306	374	143	164	241
PRJNA550398	SAMN12126529	International Rice Research Institute	IRGC 89152	89152	NA		-17.5	24.8	Zambia	5	0.031	0.969	0	0.0493333	0.0176667	0.933	2	0.000333333	0	0.999	216	321	306	374	144	164	241
PRJNA550398	SAMN12126528	International Rice Research Institute	IRGC 89151	89151	NA		-17.4833	24.4667	Zambia	5	0.033	0.967	0	0.0526667	0.0156667	0.932	2	0	0	1	216	321	306	374	143	164	241
PRJNA550398	SAMN12126527	International Rice Research Institute	IRGC 89151	89151	NA		-17.4833	24.4667	Zambia	5	0.031	0.969	0	0.0473333	0.02	0.933	2	0	0	1	216	321	306	374	144	164	241
PRJNA550398	SAMN12126526	International Rice Research Institute	IRGC 89149	89149	NA		-8.95	31.3667	Zambia	4	0.025	0.975	0	0.038	0.015	0.946667	2	0.228333	0	0.771667	216	321	307	374	143	164	241
PRJNA550398	SAMN12126525	International Rice Research Institute	IRGC 89149	89149	NA		-8.95	31.3667	Zambia	4	0.022	0.978	0	0.036	0.014	0.95	2	0.3	0	0.699667	216	321	306	374	143	164	241
PRJNA550398	SAMN12126524	International Rice Research Institute	IRGC 89147	89147	NA		-11.1667	29.5333	Zambia	4	0.011	0.989	0	0.027	0.008	0.965	2	0.468667	0	0.531333	216	321	306	374	143	164	NA
PRJNA550398	SAMN12126523	International Rice Research Institute	IRGC 89147	89147	NA		-11.1667	29.5333	Zambia	4	0.007	0.993	0	0.022	0.007	0.972	2	0.54	0	0.46	216	321	307	374	143	164	241
PRJNA550398	SAMN12126522	International Rice Research Institute	IRGC 89144	89144	NA		-13.1333	31.8333	Zambia	4	0	1	1	0	0	1	1	0.969	0.024	0.00666667	216	321	306	374	143	164	241
PRJNA550398	SAMN12126521	International Rice Research Institute	IRGC 89144	89144	NA		-13.1333	31.8333	Zambia	4	0	1	1	0	0	1	1	0.963333	0.0293333	0.00733333	216	321	307	374	143	164	241
PRJNA550398	SAMN12126520	International Rice Research Institute	IRGC 88822	88822	NA		-18.7772	46.8311	Madagascar	4	0	1	1	0	0	1	1	0.779	0.103333	0.118	216	321	306	374	143	163	241
PRJNA550398	SAMN12126519	International Rice Research Institute	IRGC 88822	88822	NA		-18.7772	46.8311	Madagascar	4	0	1	1	0	0	1	1	0.873667	0	0.126	216	321	307	375	143	163	241
PRJNA550398	SAMN12126518	International Rice Research Institute	IRGC 86485	86485	NA		-19.1744	23.7514	Botswana	5	0.023	0.977	0	0.041	0.016	0.942	2	0	0	1	216	321	307	375	143	164	241
PRJNA550398	SAMN12126517	International Rice Research Institute	IRGC 86485	86485	NA		-19.1744	23.7514	Botswana	5	0.02	0.98	0	0.038	0.015	0.947	2	0.0296667	0	0.97	216	321	307	374	143	164	241
PRJNA550398	SAMN12126516	International Rice Research Institute	IRGC 86484	86484	NA		-15.895	27.2394	Zambia	5	0.023	0.977	0	0.042	0.015	0.943	2	0.001	0	0.999	216	321	307	374	143	164	241
PRJNA550398	SAMN12126515	International Rice Research Institute	IRGC 86484	86484	NA		-15.895	27.2394	Zambia	5	0.02	0.98	0	0.04	0.013	0.947	2	0	0	0.999333	216	321	306	374	143	164	241
PRJNA550398	SAMN12126514	International Rice Research Institute	IRGC 86483	86483	NA		-11.4531	29.5617	Zambia	4	0.005	0.995	0	0.015	0.005	0.98	2	0.165667	0.447333	0.386667	216	321	306	375	143	164	NA
PRJNA550398	SAMN12126513	International Rice Research Institute	IRGC 86483	86483	NA		-11.4531	29.5617	Zambia	4	0.013	0.987	0	0.025	0.006	0.968	2	0.163333	0.376333	0.460667	216	321	306	375	143	164	241
PRJNA550398	SAMN12126512	International Rice Research Institute	IRGC 86480	86480	NA		-8.77167	31.1144	Zambia	4	0.194	0.806	0	0.199	0.001	0.8	NA	NA	NA	NA	216	321	306	374	143	164	241
PRJNA550398	SAMN12126511	International Rice Research Institute	IRGC 86480	86480	NA		-8.77167	31.1144	Zambia	4	0.145	0.855	0	0.151	0.001	0.848	NA	NA	NA	NA	216	321	306	374	143	164	241
PRJNA550398	SAMN12126510	International Rice Research Institute	IRGC 83826	83826	NA		17.5797	-3.99861	Mali	1	0.994	0.006	0	0.085	0.863	0.052	NA	NA	NA	NA	212	320	307	373	143	163	241
PRJNA550398	SAMN12126509	International Rice Research Institute	IRGC 83826	83826	NA		17.5797	-3.99861	Mali	1	0.992	0.008	0	0.0863333	0.860667	0.053	NA	NA	NA	NA	212	320	307	373	143	NA	241
PRJNA550398	SAMN12126508	International Rice Research Institute	IRGC 83801	83801	NA		15.4456	18.7381	Chad	4	0	1	1	0	0	1	1	0.712	0.218	0.07	216	321	307	375	143	164	241
PRJNA550398	SAMN12126507	International Rice Research Institute	IRGC 83801	83801	NA		15.4456	18.7381	Chad	6	0	1	1	0	0	1	3	0.313	0.636	0.051	216	321	307	375	143	164	241
PRJNA550398	SAMN12126506	International Rice Research Institute	IRGC 83800	83800	NA		15.4456	18.7381	Chad	4	0	1	1	0	0	1	1	0.908333	0.0646667	0.027	216	321	307	374	143	164	241
PRJNA550398	SAMN12126505	International Rice Research Institute	IRGC 83800	83800	NA		15.4456	18.7381	Chad	4	0	1	1	0	0	1	1	0.773333	0.226	0.001	216	321	307	374	143	164	241
PRJNA550398	SAMN12126504	International Rice Research Institute	IRGC 82987	82987	NA		-12.55	30.2833	Zambia	4	0.005	0.995	0	0.017	0.005	0.978	1	0.55	0	0.449667	216	321	306	374	143	164	241
PRJNA550398	SAMN12126503	International Rice Research Institute	IRGC 82987	82987	NA		-12.55	30.2833	Zambia	4	0.002	0.998	0	0.011	0.004	0.985	1	0.626	0	0.374	216	321	306	374	143	164	241
PRJNA550398	SAMN12126502	International Rice Research Institute	IRGC 81968	81968	NA		-19.1194	23.9881	Botswana	5	0.009	0.991	0	0.025	0.009	0.966	2	0.242	0.000666667	0.757667	216	321	307	374	143	164	241
PRJNA550398	SAMN12126501	International Rice Research Institute	IRGC 81968	81968	NA		-19.1194	23.9881	Botswana	5	0.01	0.99	0	0.024	0.011	0.965	2	0.256333	0.015	0.728667	216	321	307	375	143	164	241
PRJNA550398	SAMN12126500	International Rice Research Institute	IRGC 81966	81966	NA		-15.8575	27.2439	Zambia	4	0.01	0.99	0	0.026	0.01	0.964	2	0.352667	0.00433333	0.643	216	321	307	374	143	164	232
PRJNA550398	SAMN12126499	International Rice Research Institute	IRGC 81966	81966	NA		-15.8575	27.2439	Zambia	4	0	1	1	0	0	1	1	0.455667	0.159667	0.385	216	321	306	374	143	164	232
PRJNA550398	SAMN12126498	International Rice Research Institute	IRGC 81965	81965	NA		-15.75	27.9	Zambia	4	0.002	0.998	0	0.011	0.004	0.985	2	0.366	0.18	0.454	216	321	307	375	143	164	241
PRJNA550398	SAMN12126496	International Rice Research Institute	IRGC 81964	81964	NA		-15.9533	27.6511	Zambia	5	0.013	0.987	0	0.03	0.011	0.959	2	0.094	0	0.905667	216	NA	NA	374	143	164	241
PRJNA550398	SAMN12126495	International Rice Research Institute	IRGC 81964	81964	NA		-15.9533	27.6511	Zambia	5	0.015	0.985	0	0.034	0.01	0.956	2	0.106667	0	0.893333	216	321	306	374	143	164	241
PRJNA550398	SAMN12126494	International Rice Research Institute	IRGC 81963	81963	NA		-15.75	27.75	Zambia	5	0.01	0.99	0	0.028	0.00866667	0.963333	2	0.15	0	0.85	216	321	307	374	143	164	241
PRJNA550398	SAMN12126493	International Rice Research Institute	IRGC 81963	81963	NA		-15.75	27.75	Zambia	5	0.015	0.985	0	0.031	0.0116667	0.957	2	0.147333	0	0.852667	216	321	307	374	143	164	241
PRJNA550398	SAMN12126492	International Rice Research Institute	IRGC 81962	81962	NA		-15.7572	27.8353	Zambia	5	0.013	0.987	0	0.033	0.01	0.956	2	0.072	0	0.927667	216	321	306	374	143	164	241
PRJNA550398	SAMN12126491	International Rice Research Institute	IRGC 81962	81962	NA		-15.7572	27.8353	Zambia	5	0.019	0.981	0	0.038	0.011	0.951	2	0.046	0	0.954	216	321	307	374	143	164	241
PRJNA550398	SAMN12126490	International Rice Research Institute	IRGC 81961	81961	NA		-15.8406	28.2422	Zambia	5	0.012	0.988	0	0.03	0.00966667	0.96	2	0.165	0	0.835	216	321	307	374	143	164	241
PRJNA550398	SAMN12126489	International Rice Research Institute	IRGC 81961	81961	NA		-15.8406	28.2422	Zambia	4	0.002	0.998	0	0.011	0.004	0.985	1	0.613667	0.001	0.385667	216	321	307	374	143	164	241
PRJNA550398	SAMN12126488	International Rice Research Institute	IRGC 81960	81960	NA		-13.2075	31.9131	Zambia	4	0.003	0.997	0	0.0123333	0.004	0.984	1	0.584333	0.002	0.413667	216	321	306	374	143	163	241
PRJNA550398	SAMN12126487	International Rice Research Institute	IRGC 81960	81960	NA		-13.2075	31.9131	Zambia	4	0.003	0.997	0	0.014	0.005	0.981	2	0.531667	0	0.468333	216	321	306	374	143	163	241
PRJNA550398	SAMN12126486	International Rice Research Institute	IRGC 81959	81959	NA		-13.1383	31.8556	Zambia	4	0	1	1	0	0	1	1	0.778	0	0.221667	216	321	307	375	143	164	241
PRJNA550398	SAMN12126485	International Rice Research Institute	IRGC 81959	81959	NA		-13.1383	31.8556	Zambia	4	0	1	1	0	0	1	1	0.882333	0.011	0.106	216	321	307	374	143	164	241
PRJNA550398	SAMN12126484	International Rice Research Institute	IRGC 81958	81958	NA		-13.2239	31.9256	Zambia	4	0	1	1	0	0	1	1	0.922667	0.0626667	0.0146667	NA	321	306	374	143	164	241
PRJNA550398	SAMN12126483	International Rice Research Institute	IRGC 81958	81958	NA		-13.2239	31.9256	Zambia	4	0.005	0.995	0	0.018	0.006	0.976	2	0.499667	0.00266667	0.497667	216	321	307	375	143	163	241
PRJNA550398	SAMN12126482	International Rice Research Institute	IRGC 81957	81957	NA		-13.225	31.9375	Zambia	4	0	1	1	0.011	0.004	0.986	1	0.624667	0	0.375	216	321	306	375	143	164	NA
PRJNA550398	SAMN12126481	International Rice Research Institute	IRGC 81957	81957	NA		-13.225	31.9375	Zambia	4	0	1	1	0	0	1	1	0.594333	0.279667	0.126	216	321	306	374	143	164	241
PRJNA550398	SAMN12126480	International Rice Research Institute	IRGC 81956	81956	NA		-11.2678	29.5356	Zambia	4	0.006	0.994	0	0.02	0.007	0.972	2	0.452667	0.000666667	0.546667	216	321	306	374	143	164	241
PRJNA550398	SAMN12126479	International Rice Research Institute	IRGC 81956	81956	NA		-11.2678	29.5356	Zambia	4	0	1	1	0	0	1	1	0.756333	0.00166667	0.242	216	321	306	374	143	164	241
PRJNA550398	SAMN12126478	International Rice Research Institute	IRGC 81955	81955	NA		-11.2678	29.5356	Zambia	4	0	1	1	0.008	0.003	0.99	1	0.361	0.385333	0.254	216	321	307	374	143	164	241
PRJNA550398	SAMN12126477	International Rice Research Institute	IRGC 81955	81955	NA		-11.2678	29.5356	Zambia	4	0.015	0.985	0	0.027	0.006	0.967	2	0.503	0.00733333	0.489667	216	321	306	374	143	163	241
PRJNA550398	SAMN12126476	International Rice Research Institute	IRGC 81954	81954	NA		-10.2	31.1997	Zambia	4	0	1	1	0	0	1	1	0.866	0.0193333	0.114667	216	321	307	375	143	163	241
PRJNA550398	SAMN12126475	International Rice Research Institute	IRGC 81954	81954	NA		-10.2	31.1997	Zambia	4	0.009	0.991	0	0.021	0.007	0.972	2	0.304	0.220667	0.475667	216	321	306	374	143	164	241
PRJNA550398	SAMN12126474	International Rice Research Institute	IRGC 81952	81952	NA		-15.2428	23.0114	Zambia	4	0.008	0.992	0	0.0243333	0.008	0.968	2	0.365333	0	0.634333	216	321	307	374	144	164	241
PRJNA550398	SAMN12126473	International Rice Research Institute	IRGC 81952	81952	NA		-15.2428	23.0114	Zambia	4	0	1	1	0	0	1	1	0.335667	0.413333	0.250667	216	321	306	374	144	164	241
									1	108	glabbarth	108
									2	247	sativa	234
									3	78	sativa	77	309
									4	187	longi	187
									5	18	longi	18
									6	161	longi	158	365
												782
												799
