# Supplementary material for: Solving the mystery of Obake rice in Africa: population structure analyses of Oryza longistaminata reveal three genetic groups and evidence of both recent and ancient introgression with O. sativa
Source: Front Plant Sci. 2023 Nov 15;14:1278196. doi: 10.3389/fpls.2023.1278196 (PMC10684938; doi:10.3389/fpls.2023.1278196)
Supplement: Supplementary file 2 [file Table_2.xlsx]

## Sheet: Sheet1
Marker ID	Forward Primer	Reverse Primer
gid4	TGTAAAACGACGGCCAGTTGGCGGCAGTCTCGAAAAAG	CAAGTTCACGAACTAATAAGG
olc3	TGTAAAACGACGGCCAGTCAGCCAACGATGACACTATGA	CTCAACTCAGCAACGTGAAGTA
olc5	TGTAAAACGACGGCCAGTCCAGCACGGGTCCAATAATTTG	GACTCATTCCATGAGTAAACG
olc7	TGTAAAACGACGGCCAGTTCGGGACGCTCTTTGTTATTC	TTGCTTCGTATTGTCGAGATCC
RCt8	TGTAAAACGACGGCCAGTATAGTCAAGAAAGAGGATCTAGAAT	ACCGCGATTCAATAAGAGTA
RCt9	TGTAAAACGACGGCCAGTATAAGGTTATTCCCCGCTTACC	AAATTGGGGGAATTCGTACC
rid3	TGTAAAACGACGGCCAGTAATTGCTCTCACCGCTCTTTC	TAGTCGAATTGTTGTATCAACTC
